# Supplementary material
Source: PubMed Central journal article supplement (PMC9126186)
Supplement: NIHMS1734943-supplement-Supplement1.pdf [file NIHMS1734943-supplement-Supplement1.pdf]

## Supplementary Appendix

This appendix has been provided by the authors to give readers additional information about their work.

Supplement to: Tutt ANJ, Garber JE, Kaufman B, et al. Adjuvant olaparib for patients with *BRCA1*- or *BRCA2*-mutated breast cancer. *N Engl J Med* 2021;384:2394-405. DOI: 10.1056/NEJMoa2105215

---

## TABLE OF CONTENTS

|                                                                                                                                                                                      |           |
|--------------------------------------------------------------------------------------------------------------------------------------------------------------------------------------|-----------|
| <b>1. OLYMPIA COLLABORATORS</b> .....                                                                                                                                                | <b>3</b>  |
| THE OLYMPIA STEERING COMMITTEE.....                                                                                                                                                  | 3         |
| THE OLYMPIA GENETICS ADVISORY COMMITTEE .....                                                                                                                                        | 4         |
| OLYMPIA TRANSLATIONAL ADVISORY COMMITTEE.....                                                                                                                                        | 5         |
| THE OLYMPIA INDEPENDENT DATA MONITORING COMMITTEE .....                                                                                                                              | 5         |
| <b>2. OLYMPIA SITES AND INVESTIGATORS</b> .....                                                                                                                                      | <b>6</b>  |
| ABCSG: AUSTRIAN BREAST & COLORECTAL CANCER STUDY GROUP .....                                                                                                                         | 6         |
| AGO-B: ARBEITSGEMEINSCHAFT GYNÄKOLOGISCHE ONKOLOGIE BREAST STUDY GROUP .....                                                                                                         | 6         |
| BCT-ANZ: BREAST CANCER TRIALS - AUSTRALIA & NEW ZEALAND .....                                                                                                                        | 7         |
| BOOG: BORSTKANKER ONDERZOEK GROEP .....                                                                                                                                              | 7         |
| CCTG: CANADIAN CANCER TRIALS GROUP .....                                                                                                                                             | 7         |
| CEEQG: CENTRAL AND EAST EUROPEAN ONCOLOGY GROUP .....                                                                                                                                | 7         |
| EORTC: EUROPEAN ORGANISATION FOR RESEARCH AND TREATMENT OF CANCER .....                                                                                                              | 8         |
| GAICO: GRUPO ARGENTINO DE INVESTIGACIÓN CLINICA EN ONCOLOGIA .....                                                                                                                   | 8         |
| GBG: GERMAN BREAST GROUP .....                                                                                                                                                       | 8         |
| GEICAM: SPANISH BREAST CANCER GROUP.....                                                                                                                                             | 9         |
| GOIRC: ITALIAN ONCOLOGY GROUP FOR CLINICAL RESEARCH .....                                                                                                                            | 10        |
| IBCG: ICELANDIC BREAST CANCER GROUP .....                                                                                                                                            | 10        |
| IBCSG: INTERNATIONAL BREAST CANCER STUDY GROUP .....                                                                                                                                 | 10        |
| ICR CTSU: INSTITUTE OF CANCER RESEARCH – CLINICAL TRIALS & STATISTICS UNIT.....                                                                                                      | 10        |
| JBCRG: JAPAN BREAST CANCER RESEARCH GROUP .....                                                                                                                                      | 11        |
| NCI NATIONAL CLINICAL TRIALS NETWORK: COMPRISED OF NRG ONCOLOGY, ALLIANCE FOR<br>CLINICAL TRIALS IN ONCOLOGY, ECOG-ACRIN CANCER RESEARCH GROUP AND<br>SOUTHWEST ONCOLOGY GROUP ..... | 12        |
| SABO: SWEDISH ASSOCIATION OF BREAST ONCOLOGISTS .....                                                                                                                                | 16        |
| SOLTI.....                                                                                                                                                                           | 16        |
| SUCCESS.....                                                                                                                                                                         | 17        |
| TCOG: TAIWAN COOPERATIVE ONCOLOGY GROUP .....                                                                                                                                        | 17        |
| UCBG: UNICANCER BREAST GROUP .....                                                                                                                                                   | 18        |
| INDEPENDENT SITES .....                                                                                                                                                              | 18        |
| <b>3. SUPPLEMENTARY METHODS</b> .....                                                                                                                                                | <b>20</b> |
| 3.1 DUAL PLATFORM MODEL USED TO CONDUCT THE OLYMPIA TRIAL.....                                                                                                                       | 20        |
| 3.2 ELIGIBILITY CRITERIA.....                                                                                                                                                        | 21        |
| 3.3 CALCULATION FOR THE CPS&EG STAGING SYSTEM .....                                                                                                                                  | 26        |
| 3.4 POOLING STRATEGY FOR STRATIFICATION FACTORS .....                                                                                                                                | 28        |
| 3.5 SENSITIVITY ANALYSES.....                                                                                                                                                        | 29        |
| <b>4. SUPPLEMENTARY FIGURES</b> .....                                                                                                                                                | <b>32</b> |

---

|                                                                                                                                                                                                        |           |
|--------------------------------------------------------------------------------------------------------------------------------------------------------------------------------------------------------|-----------|
| FIGURE S1: OLYMPIA TRIAL SCHEMA .....                                                                                                                                                                  | 32        |
| FIGURE S2: AVAILABILITY OF BRCA TESTING RESULTS: LOCALLY (INCLUDING BGI GENOMICS FOR ALL PATIENTS IN CHINA) AND CENTRALLY BY MYRIAD GENETICS [1] .....                                                 | 33        |
| FIGURE S3: MULTIPLE TESTING PROCEDURE AT THE INTERIM ANALYSIS .....                                                                                                                                    | 35        |
| FIGURE S4: CONSORT DIAGRAM FOR THE OLYMPIA TRIAL - PATIENT POPULATION AND DISPOSITION .....                                                                                                            | 36        |
| FIGURE S5: EORTC QLQ-C30 GHQ SCORE .....                                                                                                                                                               | 38        |
| FIGURE S6: KM PLOTS FOR IDFS IN THE MATURE COHORT .....                                                                                                                                                | 40        |
| <b>5. SUPPLEMENTARY TABLES .....</b>                                                                                                                                                                   | <b>41</b> |
| TABLE S1: PATIENTS RANDOMIZED IN OLYMPIA, BY COUNTRY .....                                                                                                                                             | 41        |
| TABLE S2A: <i>BRCA1/2</i> VARIANT STATUS ANALYSED LOCALLY AND/OR CENTRALLY AT MYRIAD GENETICS [1].....                                                                                                 | 42        |
| TABLE S2B: P/LP <i>BRCA1/2</i> VARIANTS FOR >1 PATIENT [1] .....                                                                                                                                       | 44        |
| TABLE S3: DISCORDANT LOCAL <i>BRCA1/2</i> STATUS VS CENTRAL MYRIAD <i>BRCA1/2</i> STATUS FOR 22 (2.0%) PATIENTS AMONG THE 1090 PATIENTS WITH BOTH LOCAL AND CENTRAL MYRIAD RESULTS AVAILABLE [1] ..... | 47        |
| TABLE S4: CENTRAL RECEPTOR STATUS EXCLUDING CHINESE PATIENTS.....                                                                                                                                      | 48        |
| TABLE S5: LOCAL VS CENTRAL LABORATORY RESULTS: HORMONE RECEPTOR STATUS .....                                                                                                                           | 49        |
| TABLE S6: DEMOGRAPHIC AND BASELINE DISEASE CHARACTERISTICS OF THE PATIENTS.....                                                                                                                        | 50        |
| TABLE S7: TYPE OF FIRST IDFS EVENT [1].....                                                                                                                                                            | 55        |
| TABLE S8: ALL DEATHS.....                                                                                                                                                                              | 56        |
| TABLE S9: RESULTS OF SENSITIVITY ANALYSES.....                                                                                                                                                         | 57        |
| TABLE S10: INVASIVE DISEASE FREE SURVIVAL SUBGROUP ANALYSIS.....                                                                                                                                       | 59        |
| TABLE S11: EXPOSURE TO STUDY TREATMENT (SAFETY ANALYSIS SET) .....                                                                                                                                     | 63        |
| TABLE S12: DOSE INTENSITY (SAFETY ANALYSIS SET) .....                                                                                                                                                  | 64        |
| TABLE S13 OF CUMULATIVE EXPOSURE OVER TIME IN MONTHS (SAFETY ANALYSIS SET) .....                                                                                                                       | 65        |
| TABLE S14A: BLOOD TRANSFUSIONS (SAFETY ANALYSIS SET).....                                                                                                                                              | 66        |
| TABLE S14B: BLOOD TRANSFUSIONS OVER TIME (SAFETY ANALYSIS SET).....                                                                                                                                    | 66        |
| TABLE S15: TREATMENT DOSE REDUCTIONS (SAFETY ANALYSIS SET)[1] .....                                                                                                                                    | 67        |
| TABLE S16: MOST COMMON AES LEADING TO PERMANENT DISCONTINUATION OF TREATMENT (SAFETY ANALYSIS SET).....                                                                                                | 68        |
| TABLE S17: ANY CONCURRENT HORMONE THERAPY FOR PRIMARY BREAST CANCER IN THE HR+/HER2- SUBGROUP.....                                                                                                     | 69        |
| TABLE S18: IMPORTANT PROTOCOL DEVIATIONS.....                                                                                                                                                          | 70        |
| TABLE S19: SUMMARY OF ADVERSE EVENTS IN THE SAFETY ANALYSIS SET [1].....                                                                                                                               | 72        |
| <b>6. REFERENCE.....</b>                                                                                                                                                                               | <b>74</b> |

---

## 1. OLYMPIA COLLABORATORS

We would like to thank the following individuals for their most valuable contribution to the conduct of the OlympiA study.

### THE OLYMPIA STEERING COMMITTEE

#### *Voting members*

|                                                   |                |
|---------------------------------------------------|----------------|
| Andrew Tutt, BIG, Chair                           | United Kingdom |
| Charles Geyer, NRG Oncology PI, Co-Chair          | United States  |
| Judy Garber, Alliance, Co-Chair                   | United States  |
| Bella Kaufman, BIG, Co-Chair                      | Israel         |
| Christine Campbell, FS, Study Statistician        | United Kingdom |
| Gregory Yothers, NRG Oncology, Study Statistician | United States  |
| Nigel Baker, AstraZeneca, Study Statistician      | United Kingdom |
| Robin McConnell, FS                               | United Kingdom |
| Martine Piccart, BIG                              | Belgium        |
| Richard D Gelber, BIG                             | United States  |
| Priya Rastogi, NRG Oncology                       | United States  |
| Simon Hollingsworth, AstraZeneca                  | United Kingdom |
| Anitra Fielding, AstraZeneca                      | United States  |
| Larissa Korde, NCI                                | United States  |
| Giuseppe Viale, IEO, Lead Pathologist             | Italy          |
| Sunil Lakhani, BCT ANZ, Study Pathologist         | Australia      |
| Peter Lucas, NRG Oncology, Study Pathologist      | United States  |
| Giovanna Rossi, BIG HQ                            | Belgium        |
| Christian Singer, ABCSG                           | Austria        |
| Elmar Stickeler, AGO-B                            | Germany        |
| Kelly-Anne Phillips, BCT ANZ                      | Australia      |
| Agnes Jager, BOOG                                 | Netherlands    |
| Elzbieta Senkus, CEEOG                            | Poland         |
| Monica Arnedos, EORTC                             | Portugal       |
| Luis Fein, GAICO                                  | Argentina      |
| Eduardo-M De Dueñas, GEICAM                       | Spain          |
| Frederik Marmé, GBG                               | Germany        |
| Gabriele Zoppoli, GOIRC                           | Italy          |
| Óskar Jóhannsson, IBCG                            | Iceland        |
| Lorenzo Gianni, IBCSG                             | Italy          |
| Judith Bliss, ICR-CTSU                            | United Kingdom |
| Masakazu Toi, JBCRG                               | Japan          |
| Andrea Eisen, CCTG                                | Canada         |
| Anne Armstrong, NCRI-BCSG                         | United Kingdom |
| Niklas Loman, SABO                                | Sweden         |
| Judith Balmaña, SOLTI                             | Spain          |
| Wolfgang Janni, SUCCESS St G                      | Germany        |

---

Jonas Bergh, SweBCG  
Tsang-Wu Liu, TCOG  
Suzette Delalogue, UCBG  
James Ford, ECOG/ACRIN  
Priyanka Sharma, SWOG  
Tiffany Traina, Alliance  
Seock-Ah Im  
Sue Friedman, Patient Advocate  
Tanja Spanic, Patient Advocate  
Susan Domchek  
Rita Schmutzler  
Karen Gelmon  
Guenther G. Steger  
Barbro Linderholm  
Sibylle Loibl  
Shao Zhmin  
Kevin Murray, AstraZeneca  
Gursel Aktan, Merck

Sweden  
Taiwan  
France  
United States  
United States  
United States  
South Korea  
United States  
Slovenia  
United States  
Germany  
Canada  
Austria  
Sweden  
Germany  
China  
United Kingdom  
United States

***Non-voting members***

Eleanor Mcfadden, FS  
Olga Andriienko, AstraZeneca  
Karen Cui, AstraZeneca  
Vassiliki Karantza, Merck  
Konstantinos Tryfonidis, Merck  
Amal Arahmani, BIG HQ  
Evandro de Azambuja, BrEAST  
Liesbet De Vos, BIG HQ

United Kingdom  
Poland  
United States  
United States  
United States  
Belgium  
Belgium  
Belgium

**THE OLYMPIA GENETICS ADVISORY COMMITTEE**

Judy Garber, Chair  
Judith Balmaña, Deputy Chair  
Rebecca Dent  
Susan Domchek  
James Ford  
William Foulkes  
Bella Kaufman  
Edith Olah  
Maria Orr  
Kelly-Anne Phillips  
Rita Schmutzler  
Andrew Tutt

United States  
Spain  
Singapore  
United States  
United States  
Canada  
Israel  
Hungary  
AstraZeneca  
Australia  
Germany  
United Kingdom

---

## OLYMPIA TRANSLATIONAL ADVISORY COMMITTEE

|                                                          |                |
|----------------------------------------------------------|----------------|
| Susan Domchek, Chair                                     | United States  |
| Andrew Tutt, Co-Chair                                    | United Kingdom |
| Judy Garber, BRCA1/2 Genetics Advisory Committee Chair   | United States  |
| Larissa Korde, NCI                                       | United States  |
| Dan Hayes, Chair of USA co-op grps biobank               | United States  |
| Giuseppe Viale, Lead Study Pathologist,                  | Italy          |
| Sunil Lakhani, Molecular/BRCA Pathologist                | Australia      |
| Andrea Richardson, Molecular/BRCA Pathologist            | United States  |
| Chris Lord, Translational Science                        | United Kingdom |
| Jos Jonkers, Translational Science                       | Netherlands    |
| Suzette Delalogue, Translational Science                 | France         |
| Jan Hoejmakers, Translational Science                    | Netherlands    |
| Carl Barrett, Translational Science, AstraZeneca         | United Kingdom |
| Elizabeth Harrington, AstraZeneca                        | United Kingdom |
| Anitra Fielding, AstraZeneca                             | United States  |
| Natasha Lukashchuk, Translational scientist, AstraZeneca | United Kingdom |
| Peter Lucas, Vice Chair NRG Oncology Pathology Committee | United States  |

## THE OLYMPIA INDEPENDENT DATA MONITORING COMMITTEE

William E. Barlow, Chair  
Nancy Berliner  
Elizabeth Eisenhauer  
Hakan Olsson  
Sandra Swain

---

## 2. OLYMPIA SITES AND INVESTIGATORS

### ABCSG: AUSTRIAN BREAST & COLORECTAL CANCER STUDY GROUP

|                                                               |         |                         |
|---------------------------------------------------------------|---------|-------------------------|
| Krankenhaus Hietzing, Abt. für Atmungs- und Lungenkrankheiten | Austria | Paul Sevelda            |
| KH Voecklabruck, Abt. f. Innere Medizin                       | Austria | Ferdinand Haslbauer     |
| Krankenhaus der Barmherzigen Schwestern Ried                  | Austria | Monika Penzinger        |
| St. Josef KH, Interne Abt.                                    | Austria | Leopold Öhler           |
| LKH Leoben                                                    | Austria | Christoph Tinchon       |
| Universitätsklinikum Salzburg                                 | Austria | Richard Greil           |
| Klinikum Wels-Grieskirchen                                    | Austria | Sonja Heibl             |
| Allgemeines Krankenhaus der Stadt Wien                        | Austria | Rupert Bartsch          |
| Aerztezentrum - Ordination Dr. Viktor Wette                   | Austria | Viktor Wette            |
| Allgemeines Krankenhaus der Stadt Wien                        | Austria | Christian Singer        |
| LKH Villach, Gynaekologisch-Geburtshilfliche Abt.             | Austria | Claudia Pasterk         |
| Krankenhaus der Barmherzigen Schwestern Linz                  | Austria | Ruth Helfgott           |
| LKH-Universitätsklinikum Klinikum Graz                        | Austria | Gunda Pristauz-Telsnigg |
| LKH-Universitätsklinikum Klinikum Graz                        | Austria | Herbert Stöger          |
| Elisabethinen Hospital                                        | Austria | Angsar Weltermann       |
| Universitätsklinik Innsbruck                                  | Austria | Daniel Egle             |
| Ordination Dr. Irene Thiel                                    | Austria | Irene Thiel             |
| TumorZentrum Kepler Universitätsklinikum Linz                 | Austria | David Fuchs             |
| LKH Rankweil                                                  | Austria | Holger Rumpold          |
| Wilhelminenspital der Stadt Wien, 3. Med. Abteilung           | Austria | Kathrin Strasser-Weippl |

### AGO-B: ARBEITSGEMEINSCHAFT GYNÄKOLOGISCHE ONKOLOGIE BREAST STUDY GROUP

|                                                   |         |                    |
|---------------------------------------------------|---------|--------------------|
| Universitätsklinikum Freiburg                     | Germany | Beate Rautenberg   |
| Universitäts Hamburg-Eppendorf                    | Germany | Volkmar Müller     |
| Universitätsmedizin Mainz                         | Germany | Marcus Schmidt     |
| Klinikum rechts der Isar der TU Muenchen          | Germany | Stefan Paepke      |
| Klinikum Bremen-Mitte                             | Germany | Mustafa Aydogdu    |
| Martin-Luther-Universität Halle-Wittenberg        | Germany | Christoph Thomssen |
| Klinikum Frankfurt Höchst GmbH                    | Germany | Joachim Rom        |
| Helios-Kliniken Berlin - Buch                     | Germany | Christine Mau      |
| Friedrich-Alexander-Universität Erlangen-Nürnberg | Germany | Peter Fasching     |
| Johanniter-Krankenhaus Bonn                       | Germany | Uwe-Jochen Göhring |
| Klinikum Esslingen GmbH                           | Germany | Thorsten Kühn      |
| Gynäkologisch-onkologische Praxis                 | Germany | Stefanie Noeding   |
| Universitätsklinikum Essen (AöR)                  | Germany | Sherko Kümmel      |
| Marien Hospital Witten gGmbH                      | Germany | John Hackmann      |
| Universitätsklinikum Aachen                       | Germany | Elmar Stickeler    |

---

## **BCT-ANZ: BREAST CANCER TRIALS - AUSTRALIA & NEW ZEALAND**

|                                          |           |                          |
|------------------------------------------|-----------|--------------------------|
| The Townsville Hospital                  | Australia | Abhishek Joshi           |
| Sir Charles Gairdner Hospital            | Australia | Joanna Dewar             |
| Prince of Wales Hospital                 | Australia | Michael Friedlander      |
| Peter MacCallum Cancer Centre            | Australia | Kelly-Anne Phillips      |
| Cabrini Hospital                         | Australia | Yoland Antill            |
| Mater Cancer Care Centre                 | Australia | Natasha Woodward         |
| The Tweed Hospital                       | Australia | Ehtesham Abdi            |
| Gosford Hospital                         | Australia | Susan Tiley              |
| Tamworth Rural Referral Hospital         | Australia | Mathew George            |
| Royal Hobart Hospital                    | Australia | David Boadle             |
| Concord Repatriation General Hospital    | Australia | Annabel Goodwin          |
| Calvary Mater Newcastle                  | Australia | Andre van der Westhuizen |
| Ballarat Oncology & Haematology Services | Australia | George Kannourakis       |
| Royal Adelaide Hospital                  | Australia | Nicholas Murray          |
| ICON Cancer Care Wesley                  | Australia | Nicole McCarthy          |

## **BOOG: BORSTKANKER ONDERZOEK GROEP**

|                                                               |             |                    |
|---------------------------------------------------------------|-------------|--------------------|
| Leids Universitair Medisch Centrum                            | Netherlands | Judith Kroep       |
| Maastricht Universitair Medisch Centrum                       | Netherlands | Maaïke de Boer     |
| Amphia Ziekenhuis                                             | Netherlands | Joan Heijns        |
| Erasmus Medisch Centrum                                       | Netherlands | Agnes Jager        |
| Zuyderland Medisch Centrum Sittard-Geleen                     | Netherlands | Franciscus Erdkamp |
| Zaans Medisch Centrum                                         | Netherlands | Sandra Bakker      |
| Nederlands Kanker Instituut Antoni van Leeuwenhoek Ziekenhuis | Netherlands | Gabe Sonke         |

## **CCTG: CANADIAN CANCER TRIALS GROUP**

|                                                |        |                    |
|------------------------------------------------|--------|--------------------|
| Saskatchewan Cancer Agency                     | Canada | Amer Sami          |
| Cross Cancer Institute                         | Canada | John Mackey        |
| CISSSMC - Hospital Charles Le Moyne            | Canada | Catherine Prady    |
| Sunnybrook Health Sciences Centre              | Canada | Andrea Eisen       |
| CHAUQ Hopital du St-Sacrement                  | Canada | Christine Desbiens |
| Centre Hospitalier de l'Universite de Montreal | Canada | Erica Patocskai    |
| Hopital General Juif                           | Canada | Cristiano Ferrario |
| BCCA - Vancouver Centre                        | Canada | Karen Gelmon       |
| Juravinski Cancer Centre                       | Canada | Louise Bordeleau   |
| Allan Blair Cancer Centre                      | Canada | Haji Chalchal      |
| CancerCare Manitoba                            | Canada | Saroj Niraula      |

## **CEEEOG: CENTRAL AND EAST EUROPEAN ONCOLOGY GROUP**

|                                            |        |                 |
|--------------------------------------------|--------|-----------------|
| Tel Aviv Sourasky Medical Center Ichilov   | Israel | ido wolf        |
| Uniwersyteckie Centrum Kliniczne w Gdańsku | Poland | Elżbieta Senkus |



---

## **EORTC: EUROPEAN ORGANISATION FOR RESEARCH AND TREATMENT OF CANCER**

|                                                          |                |                             |
|----------------------------------------------------------|----------------|-----------------------------|
| Cliniques Universitaires Saint-Luc                       | Belgium        | François Duhoux             |
| A.Z. Damiaan                                             | Belgium        | Randal d'Hondt              |
| Cliniques universitaires de Bruxelles - Hôpital Érasme   | Belgium        | Sylvie Luce                 |
| Institut Jules Bordet                                    | Belgium        | Daphné t'Kint de Roodenbeke |
| Universitair Ziekenhuis Antwerpen (UZA)                  | Belgium        | Konstantinos Papadimitriou  |
| AZ Groeninge                                             | Belgium        | Marleen Borms               |
| CHU UCL Namur                                            | Belgium        | Claire Quaghebeur           |
| Institut du Cancer de Montpellier Val d'Aurelle          | France         | William Jacot               |
| Institut Curie - Hôpital René Huguenin                   | France         | Etienne Brain               |
| CHU de Limoges - Hôpital Dupuytren                       | France         | Laurence Venat-Bouvet       |
| Hôpital Privé du Confluent                               | France         | Alain Lortholary            |
| Narodowy Instytut Onkologii im. Marii Skłodowskiej-Curie | Poland         | Zbigniew Nowecki            |
| Centro Clínico Champalimaud                              | Portugal       | Fátima Cardoso              |
| Western General Hospital                                 | United Kingdom | Richard Hayward             |

## **GAICO: GRUPO ARGENTINO DE INVESTIGACIÓN CLÍNICA EN ONCOLOGÍA**

|                                                           |           |                            |
|-----------------------------------------------------------|-----------|----------------------------|
| Clinica Universitaria Privada Reina Fabiola               | Argentina | Santiago Bella             |
| Centro Oncologico de Integracion Regional                 | Argentina | Mauricio Fernández Lazzaro |
| Clínica Privada Colombo                                   | Argentina | Norma Pilnik               |
| Instituto de Oncología de Rosario                         | Argentina | Luis Fein                  |
| Clinica ISIS                                              | Argentina | Cesar Blajman              |
| CENIT Centro Medico de Neuro, Investigacion y Tratamiento | Argentina | Guillermo Lerzo            |
| Centro de Oncologia e Investigacion en Buenos Aires       | Argentina | Mirta Varela               |
| Centro Medico San Roque                                   | Argentina | Juan Jose Zarba            |
| Centro Oncologico Riojano Integral (Cori)                 | Argentina | Diego Kaen                 |
| Instituto Medico Especializado Alexander Fleming          | Argentina | Maria Victoria Constanzo   |

## **GBG: GERMAN BREAST GROUP**

|                                                  |         |                    |
|--------------------------------------------------|---------|--------------------|
| Universitätsklinikum Münster                     | Germany | Joke Tio           |
| Henriettenstiftung, Hannover                     | Germany | Wulf Siggelkow     |
| Klinikum Offenbach                               | Germany | Christian Jackisch |
| Klinikum der Eberhard-Karls-Universität Tübingen | Germany | Eva Maria Grischke |
| Wald-Klinikum Gera                               | Germany | Dirk Zahm          |
| DONAUISAR Klinikum Deggendorf                    | Germany | Sara Tato-Varela   |
| Elisabeth-Krankenhaus Kassel                     | Germany | Sabine Schmatloch  |
| Praxisklinik Berlin                              | Germany | Peter Klare        |
| Johanniter-Krankenhaus der Altmark Stendal       | Germany | Andrea Stefek      |
| Universitätsklinikum Köln                        | Germany | Kerstin Rhiem      |
| Universitätsklinikum Essen (AÖR)                 | Germany | Oliver Hoffmann    |
| Kliniken Essen-Mitte                             | Germany | Sherko Kümmel      |
| Caritasklinik St. Theresia, Saarbrücken          | Germany | Mustafa Deryal     |
| Praxis und Tagesklinik, Ebersberg                | Germany | Isolde Gröll       |
| Städtisches Klinikum Brandenburg                 | Germany | Peter Ledwon       |

|                                                           |         |                           |
|-----------------------------------------------------------|---------|---------------------------|
| Gemeinschaftspraxis, Hildesheim                           | Germany | Christoph Uleer           |
| Klinikum Chemnitz                                         | Germany | Petra Krabisch            |
| Ev. Waldkrankenhaus Spandau, Berlin                       | Germany | Jochem Potenberg          |
| Luisenkrankenhaus GmbH&Co.KG Düsseldorf                   | Germany | Maren Darsow              |
| Medizinische Hochschule Hannover                          | Germany | Tjoung-Won Park-Simon     |
| MVZ Osthessen GmbH, Fulda                                 | Germany | Heinz-Gert Höffkes        |
| Oncologianova GmbH, Recklinghausen                        | Germany | Till-Oliver Emde          |
| Studienzentrum Zehlendorf, Berlin                         | Germany | Gerd Graffunder           |
| St.-Vincentius Kliniken gAG Karlsruhe                     | Germany | Oliver Tomé               |
| Universitätsklinikum Leipzig AÖR                          | Germany | Dirk Forstmeyer           |
| Praxis Dr. med. Jürgen Terhaag, Eggenfelden               | Germany | Jürgen Terhaag            |
| Rotkreuzklinikum Munich                                   | Germany | Christoph Salat           |
| Universitätsklinikum Carl Gustav Carus der TU Dresden     | Germany | Karin Kast                |
| Gemeinschaftspraxis für Hämatologie und Onkologie, Erfurt | Germany | Steffi Weniger            |
| Onkologisch Hämatologische Schwerpunktpraxis, Bremen      | Germany | Carsten Schreiber         |
| Gemeinschaftspraxis, Augsburg                             | Germany | Bernhard Heinrich         |
| Klinikum Südstadt, Rostock                                | Germany | Max Dieterich             |
| St. Vincenz Krankenhaus, Karlsruhe                        | Germany | Michaela Penelope Wüllner |

#### **GEICAM: SPANISH BREAST CANCER GROUP**

|                                                   |       |                                 |
|---------------------------------------------------|-------|---------------------------------|
| Hospital Clinico Universitario Lozano Blesa       | Spain | Raquel Andrés Conejero          |
| Hospital Clinico Universitario San Carlos         | Spain | José Ángel García Sáenz         |
| Complejo Hospitalario Universitario A Coruña      | Spain | Lourdes Calvo Martínez          |
| Consorti Sanitari de Terrassa                     | Spain | Angels Arcusa Lanza             |
| Hospital Arnau de Vilanova (Lleida)               | Spain | Serafín Morales Murillo         |
| Hospital Universitario Virgen Macarena            | Spain | Fernando Henao Carrasco         |
| Fundación Instituto Valenciano de Oncología (IVO) | Spain | Salvador Blanch Tormo           |
| Hospital Universitario de Donostia                | Spain | Isabel Álvarez López            |
| Hospital Infanta Cristina                         | Spain | Juan Ignacio Delgado Mingorance |
| Hospital Lucus Augusti de Lugo                    | Spain | Elena Álvarez Gomez             |
| Clínica Universitaria de Navarra                  | Spain | Marta Santisteban               |
| Hospital Universitario de Canarias (Tenerife)     | Spain | Josefina Cruz Jurado            |
| Hospital Germans Trias i Pujol                    | Spain | Vanesa Quiroga                  |
| Hospital Universitario Virgen del Rocio           | Spain | Manuel Ruiz Borrego             |
| Hospital Provincial Centre de Castello            | Spain | Eduardo Martínez de Dueñas      |
| Complejo Asistencial de Avila                     | Spain | Jose Enrique Alés Martínez      |
| Hospital Universitario Reina Sofía                | Spain | Juan De la Haba                 |
| Hospital Universitario Ramón y Cajal              | Spain | Noelia Martínez Jañez           |
| Hospital General Universitario de Elche           | Spain | Álvaro Rodríguez Lescure        |
| Hospital Miguel Servet                            | Spain | Antonio Antón Torres            |
| Corporació Sanitària Parc Taulí                   | Spain | Gema Llorc Crusades             |
| Hospital San Pedro de Alcántara                   | Spain | Santiago González-Santiago      |
| Hospital Clínico Univ. Virgen de la Victoria      | Spain | Antonia Marquez Aragones        |
| Complejo Hospitalario de Jaen                     | Spain | Ana Laura Ortega                |
| Hospital de la Santa Creu i Sant Pau              | Spain | Agusti Barnadas Molins          |
| Toledo, H. V. de la Salud, Oncología              | Spain | José Ignacio Chacón López-Muñiz |

|                                                 |       |                        |
|-------------------------------------------------|-------|------------------------|
| Hospital General Universitario Gregorio Marañón | Spain | Miguel Martín Jiménez  |
| Hospital Universitari i Politècnic La Fe        | Spain | Ana Santaballa Bertrán |
| Hospital Clínico Universitario de Salamanca     | Spain | César Rodríguez        |
| Hospital Quiron de Madrid                       | Spain | Lucía González Cortijo |

### **GOIRC: ITALIAN ONCOLOGY GROUP FOR CLINICAL RESEARCH**

|                                                              |       |                     |
|--------------------------------------------------------------|-------|---------------------|
| Ospedale Generale Regionale Bolzano Boheler Lorenz           | Italy | Elisabetta Cretella |
| Azienda Ospedaliera Policlinico di Modena                    | Italy | Laura Cortesi       |
| Ospedale di Belcolle                                         | Italy | Enzo Maria Ruggeri  |
| AO Busto Arsizio - Presidio di Saronno - SC Oncologia Medica | Italy | Claudio Verusio     |
| Ospedale Sacro Cuore                                         | Italy | Stefania Gori       |
| Azienda Ospedaliera "Mater Salutis"/Aulss 9                  | Italy | Andrea Bonetti      |
| Ospedale S.Maria della Misericordia                          | Italy | Anna Maria Mosconi  |

### **IBCG: ICELANDIC BREAST CANCER GROUP**

|                                  |         |                  |
|----------------------------------|---------|------------------|
| Landspítali, University Hospital | Iceland | Oskar Johannsson |
|----------------------------------|---------|------------------|

### **IBCSG: INTERNATIONAL BREAST CANCER STUDY GROUP**

|                                               |             |                   |
|-----------------------------------------------|-------------|-------------------|
| CHU de Liège                                  | Belgium     | Guy Jerusalem     |
| UZ Leuven                                     | Belgium     | Patrick Neven     |
| Országos Onkológiai Intézet                   | Hungary     | Tünde Nagy        |
| A. O. Ospedale di Circolo e Fondazione MACCHI | Italy       | Graziella Pinotti |
| European Institute of Oncology                | Italy       | Marco Colleoni    |
| Fondazione S. Maugeri                         | Italy       | Antonio Bernardo  |
| Ospedale Infermi - Rimini                     | Italy       | Lorenzo Gianni    |
| Multimedica Castellanza                       | Italy       | Eraldo Bucci      |
| Ospedale Misericordia e Dolce                 | Italy       | Laura Biganzoli   |
| University Hospital of Zurich                 | Switzerland | Konstantin Dedes  |
| Inselspital Bern                              | Switzerland | Urban Novak       |
| Centre Hospitalier Universitaire Vaudois      | Switzerland | Khalil Zaman      |

### **ICR CTSU: INSTITUTE OF CANCER RESEARCH – CLINICAL TRIALS & STATISTICS UNIT**

|                                            |                |                   |
|--------------------------------------------|----------------|-------------------|
| Bristol Royal Infirmary, Dept of Oncology  | United Kingdom | Jeremy Braybrooke |
| Weston Park Hospital, Oncology             | United Kingdom | Matthew Winter    |
| Queen Elizabeth Hospital                   | United Kingdom | Daniel Rea        |
| St Georges Hospital, Dept of Oncology      | United Kingdom | Muireann Kelleher |
| The Beatson West of Scotland Cancer Centre | United Kingdom | Sophie Barrett    |
| Nottingham City Hospital                   | United Kingdom | Stephen Chan      |
| Royal Bournemouth Hospital                 | United Kingdom | Tamas Hickish     |
| Belfast City Hospital                      | United Kingdom | Jane Hurwitz      |
| St Bartholomew's Hospital                  | United Kingdom | John Conibear     |

|                                                        |                |                    |
|--------------------------------------------------------|----------------|--------------------|
| CNS/Manager for Cancer and Haematology Clinical Trials | United Kingdom | Apurna Jegannathen |
| Royal Marsden Hospital                                 | United Kingdom | Marina Parton      |
| Guys And St Thomas Hospital                            | United Kingdom | Andrew Tutt        |
| Russells Hall Hospital                                 | United Kingdom | Rozenn Allerton    |
| Velindre Cancer Centre                                 | United Kingdom | Annabel Borley     |
| The Christie Hospital NHS Foundation Trust             | United Kingdom | Anne Armstrong     |
| Southampton General Hospital                           | United Kingdom | Ellen Copson       |
| Churchill Hospital                                     | United Kingdom | Nicola Levitt      |
| Addenbrooke's Hospital                                 | United Kingdom | Jean Abraham       |
| St James' University Hospital                          | United Kingdom | Timothy Perren     |
| University College Hospitals London                    | United Kingdom | Rebecca Roylance   |

### **JBCRG: JAPAN BREAST CANCER RESEARCH GROUP**

|                                                         |       |                    |
|---------------------------------------------------------|-------|--------------------|
| Iwate Medical University Hospital                       | Japan | Kazushige Ishida   |
| Nagoya City University Hospital                         | Japan | Tatsuya Toyama     |
| National Hospital Organization Osaka National Hospital  | Japan | Norikazu Masuda    |
| Shizuoka Cancer Center                                  | Japan | Junichiro Watanabe |
| National Hospital Organization Kyushu Cancer Center     | Japan | Eriko Tokunaga     |
| National Cancer Center Hospital                         | Japan | Takayuki Kinoshita |
| Hakuaikai Sagara Hospital                               | Japan | Yoshiaki Rai       |
| Kyoto University Hospital                               | Japan | Masahiro Takada    |
| Gunma Prefectural Cancer Center                         | Japan | Yasuhiro Yanagita  |
| Chiba Cancer Center                                     | Japan | Rikiya Nakamura    |
| Osaka International Cancer Institute                    | Japan | Takahiro Nakayama  |
| Osaka University Hospital                               | Japan | Yasuto Naoi        |
| Aichi Cancer Center Hospital                            | Japan | Hiroji Iwata       |
| Showa University Hospital                               | Japan | Seigo Nakamura     |
| National Hospital Organization Hokkaido Cancer Center   | Japan | Masato Takahashi   |
| National Hospital Organization Shikoku Cancer Center    | Japan | Kenjiro Aogi       |
| St Marianna University School of Medicine               | Japan | Koichiro Tsugawa   |
| National Cancer Center Hospital East                    | Japan | Hirofumi Mukai     |
| The Cancer Institute Hospital of JFCR                   | Japan | Toshimi Takano     |
| Saitama Medical University International Medical Center | Japan | Akihiko Osaki      |
| Niigata Cancer Center Hospital                          | Japan | Nobuaki Sato       |
| St. Luke's International Hospital                       | Japan | Hideko Yamauchi    |
| Tokai University Hospital                               | Japan | Yutaka Tokuda      |
| Hiroshima City Hospital                                 | Japan | Mitsuya Ito        |
| Kochi Medical School Hospital                           | Japan | Takeki Sugimoto    |

---

**NCI NATIONAL CLINICAL TRIALS NETWORK: COMPRISED OF NRG ONCOLOGY, ALLIANCE FOR CLINICAL TRIALS IN ONCOLOGY, ECOG-ACRIN CANCER RESEARCH GROUP AND SOUTHWEST ONCOLOGY GROUP**

|                                                                       |     |                           |
|-----------------------------------------------------------------------|-----|---------------------------|
| Mercy Hospital Fort Smith                                             | USA | Carlson, Jay W.           |
| Banner MD Anderson Cancer Center                                      | USA | Bahadur, Shakeela Wazeen  |
| UCLA / Jonsson Comprehensive Cancer Center                            | USA | Ganz, Patricia A.         |
| USC / Norris Comprehensive Cancer Center                              | USA | Lu, Min Janice            |
| Los Angeles County-USC Medical Center                                 | USA | Lu, Min Janice            |
| Cedars-Sinai Medical Center                                           | USA | Mita, Monica Mirela       |
| City of Hope Comprehensive Cancer Center                              | USA | Mortimer, Joanne E.       |
| Kaiser Permanente-Fontana                                             | USA | Polikoff, Jonathan A.     |
| Palo Alto Medical Foundation Health Care                              | USA | D'Andre, Stacy D.         |
| Stanford Cancer Institute Palo Alto                                   | USA | Telli, Melinda L.         |
| Kaiser Permanente San Leandro                                         | USA | Seaward, Samantha Andrews |
| Kaiser Permanente-Vallejo                                             | USA | Fehrenbacher, Louis       |
| Kaiser Permanente-Oakland                                             | USA | Seaward, Samantha Andrews |
| Kaiser Permanente-Santa Teresa-San Jose                               | USA | Fehrenbacher, Louis       |
| Saint Joseph's Medical Center                                         | USA | Puthillath, Ajithkumar    |
| Kaiser Permanente Los Angeles Medical Center                          | USA | Polikoff, Jonathan A.     |
| Kaiser Permanente-Fresno                                              | USA | Fehrenbacher, Louis       |
| Sutter Medical Center Sacramento                                      | USA | D'Andre, Stacy D.         |
| Kaiser Permanente-Santa Rosa                                          | USA | Fehrenbacher, Louis       |
| Kaiser Permanente-Woodland Hills                                      | USA | Polikoff, Jonathan A.     |
| Kaiser Permanente-Baldwin Park                                        | USA | Polikoff, Jonathan A.     |
| Contra Costa Regional Medical Center                                  | USA | Feusner, James Henry      |
| Sutter Roseville Medical Center                                       | USA | Bobolis, Kristie Ann      |
| Kaiser Permanente West Los Angeles                                    | USA | Polikoff, Jonathan A.     |
| Marin Cancer Care Inc                                                 | USA | Eisenberg, Peter David    |
| Kaiser Permanente Medical Center-Vacaville                            | USA | Fehrenbacher, Louis       |
| Kaiser Permanente-San Marcos                                          | USA | Polikoff, Jonathan A.     |
| Palo Alto Medical Foundation-Santa Cruz                               | USA | D'Andre, Stacy D.         |
| Palo Alto Medical Foundation-Sunnyvale                                | USA | Bobolis, Kristie Ann      |
| University of Colorado Hospital                                       | USA | Borges, Virginia F.       |
| Shaw Cancer Center                                                    | USA | Urquhart, Alexander Terry |
| Yale University                                                       | USA | Hofstatter, Erin Wysong   |
| Smilow Cancer Hospital Care Center-Trumbull                           | USA | Hofstatter, Erin Wysong   |
| Smilow Cancer Hospital-Waterbury Care Center                          | USA | Hofstatter, Erin Wysong   |
| MedStar Georgetown University Hospital                                | USA | McCarron, Edward C.       |
| MedStar Washington Hospital Center                                    | USA | McCarron, Edward C.       |
| Helen F Graham Cancer Center                                          | USA | Grubbs, Stephen Scott     |
| Halifax Health Medical Center-Centers for Oncology                    | USA | Deveras, Ruby Anne E.     |
| University of Miami Miller School of Medicine-Sylvester Cancer Center | USA | Mahtani, Reshma Lillaney  |
| UM Sylvester Comprehensive Cancer Center at Deerfield Beach           | USA | Mahtani, Reshma Lillaney  |
| UM Sylvester Comprehensive Cancer Center at Plantation                | USA | Mahtani, Reshma Lillaney  |

|                                                           |     |                            |
|-----------------------------------------------------------|-----|----------------------------|
| Emory University Hospital/Winship Cancer Institute        | USA | Paplomata, Elisavet        |
| Medical Center of Central Georgia                         | USA | Sumrall, Bradley Thomas    |
| Northside Hospital                                        | USA | Jones, Cheryl F.           |
| South Georgia Medical Center/Pearlman Cancer Center       | USA | Ofori, Samuel N.           |
| Straub Clinic and Hospital                                | USA | Sumida, Kenneth N.M.       |
| Pali Momi Medical Center                                  | USA | Sumida, Kenneth N.M.       |
| University of Iowa/Holden Comprehensive Cancer Center     | USA | Thomas, Alexandra          |
| Oncology Associates at Mercy Medical Center               | USA | Wilbur, Deborah Weil       |
| Mercy Medical Center - North Iowa                         | USA | Singh, Joginder (Joe)      |
| Genesis Medical Center - East Campus                      | USA | Spector, David Martens     |
| Saint Alphonsus Cancer Care Center-Boise                  | USA | Stella, Philip J.          |
| Kootenai Cancer Center                                    | USA | Marchello, Benjamin T.     |
| NorthShore University HealthSystem-Highland Park Hospital | USA | Merkel, Douglas Edward     |
| Loyola University Medical Center                          | USA | Lo, Shelly S.              |
| Mount Sinai Hospital Medical Center                       | USA | Khosla, Pam G.             |
| Northwestern University                                   | USA | Cristofanilli, Massimo     |
| University of Illinois                                    | USA | Hoskins, Kent F.           |
| Rush University Medical Center                            | USA | Cobleigh, Melody Ann       |
| Swedish Covenant Hospital                                 | USA | Lambiase, Elyse Anne       |
| University of Chicago Comprehensive Cancer Center         | USA | Hahn, Olwen Mary           |
| Presence Saint Joseph Hospital-Chicago                    | USA | Oliff, Ira Anton           |
| Decatur Memorial Hospital                                 | USA | Faller, Bryan A.           |
| Illinois CancerCare-Peoria                                | USA | Wade, James Lloyd          |
| Joliet Oncology-Hematology Associates Limited             | USA | Burhani, Nafisa D.         |
| Cancer Care Specialists of Illinois - Decatur             | USA | Wade, James Lloyd          |
| Elmhurst Memorial Hospital                                | USA | Gil, Amaryllis             |
| SwedishAmerican Regional Cancer Center                    | USA | Einhorn, Harvey E.         |
| Indiana University/Melvin and Bren Simon Cancer Center    | USA | Storniolo, Anna Maria Vita |
| Parkview Hospital Randallia                               | USA | Chang, Brian K.            |
| IU Health Ball Memorial Hospital                          | USA | Kalra, Maitri              |
| The Community Hospital                                    | USA | Robin, Erwin L.            |
| Michiana Hematology Oncology PC-Mishawaka                 | USA | Ansari, Bilal              |
| University of Kansas Cancer Center                        | USA | Sharma, Priyanka           |
| Olathe Health Cancer Center                               | USA | Sharma, Priyanka           |
| Cancer Center of Kansas - Wichita                         | USA | Dakhil, Shaker R.          |
| University of Kansas Health System Saint Francis Campus   | USA | Sharma, Priyanka           |
| Cancer Center of Kansas-Wichita Medical Arts Tower        | USA | Dakhil, Shaker R.          |
| University of Kansas Cancer Center-West                   | USA | Sharma, Priyanka           |
| Saint Joseph Hospital East                                | USA | Deming, Richard L.         |
| Ochsner Medical Center Jefferson                          | USA | Cole, John Thomas          |
| CHRISTUS Highland Medical Center                          | USA | Cole, John Thomas          |
| Ochsner Health Center-Summa                               | USA | Cole, John Thomas          |
| Our Lady of the Lake Physician Group                      | USA | Hanson, David S.           |
| Louisiana Hematology Oncology Associates LLC              | USA | Ochoa, Augusto C.          |
| Ochsner Medical Center Kenner                             | USA | Cole, John Thomas          |
| Mary Bird Perkins Cancer Center - Covington               | USA | Ochoa, Augusto C.          |
| Dana-Farber/Harvard Cancer Center                         | USA | Garber, Judy Ellen         |

|                                                      |     |                           |
|------------------------------------------------------|-----|---------------------------|
| Beth Israel Deaconess Medical Center                 | USA | Garber, Judy Ellen        |
| Berkshire Medical Center - Cancer Center             | USA | Zimble, Harvey            |
| Suburban Hospital                                    | USA | Armstrong, Deborah Kay    |
| University of Maryland/Greenebaum Cancer Center      | USA | Tkaczuk, Katherine H. Rak |
| Mercy Medical Center                                 | USA | Riseberg, David Andrew    |
| Johns Hopkins University/Sidney Kimmel Cancer Center | USA | Armstrong, Deborah Kay    |
| Frederick Memorial Hospital                          | USA | O'Connor, Brian Marcial   |
| Eastern Maine Medical Center                         | USA | Openshaw, Thomas H.       |
| Penobscot Bay Medical Center                         | USA | Openshaw, Thomas H.       |
| Harold Alfond Center for Cancer Care                 | USA | Openshaw, Thomas H.       |
| William Beaumont Hospital-Royal Oak                  | USA | Zakalik, Dana             |
| Ascension Providence Hospitals - Southfield          | USA | Vakhariya, Cynthia Mahesh |
| Saint Joseph Mercy Hospital                          | USA | Stella, Philip J.         |
| University of Michigan Comprehensive Cancer Center   | USA | Schott, Anne F.           |
| Wayne State University/Karmanos Cancer Institute     | USA | Simon, Michael Steven     |
| Henry Ford Hospital                                  | USA | Doyle, Thomas J.          |
| Ascension Saint John Hospital                        | USA | Stella, Philip J.         |
| Alliance Health                                      | USA | Stella, Philip J.         |
| Spectrum Health at Butterworth Campus                | USA | Yost, Kathleen J.         |
| Genesys Hurley Cancer Institute                      | USA | Stella, Philip J.         |
| Regions Hospital                                     | USA | Flynn, Patrick James      |
| Mercy Hospital                                       | USA | Zera, Richard T.          |
| Essentia Health Cancer Center                        | USA | Friday, Bret E.B.         |
| Mayo Clinic                                          | USA | Ruddy, Kathryn J.         |
| Saint Francis Regional Medical Center                | USA | Zera, Richard T.          |
| Mayo Clinic Health Systems-Mankato                   | USA | Ruddy, Kathryn J.         |
| Sanford Joe Lueken Cancer Center                     | USA | Steen, Preston D.         |
| Fairview Clinics and Surgery Center Maple Grove      | USA | Flynn, Patrick James      |
| Washington University School of Medicine             | USA | Ademuyiwa, Foluso Olabisi |
| Mercy Hospital Saint Louis                           | USA | Carlson, Jay W.           |
| CoxHealth South Hospital                             | USA | Carlson, Jay W.           |
| Mercy Hospital Springfield                           | USA | Carlson, Jay W.           |
| Saint Louis Cancer and Breast Institute-South City   | USA | Carlson, Jay W.           |
| University of Kansas Cancer Center - Lee's Summit    | USA | Sharma, Priyanka          |
| Kalispell Regional Medical Center                    | USA | Marchello, Benjamin T.    |
| Wake Forest University Health Sciences               | USA | Levine, Edward A.         |
| Duke University Medical Center                       | USA | Marcom, Paul Kelly        |
| Mission Hospital                                     | USA | Harkness, Cameron Blair   |
| Carolinas Medical Center/Levine Cancer Institute     | USA | Tan, Antoinette R.        |
| CaroMont Regional Medical Center                     | USA | Charles, William J.       |
| FirstHealth of the Carolinas-Moore Regional Hospital | USA | Kuzma, Charles S.         |
| Margaret R Pardee Memorial Hospital                  | USA | Radford, James Earl       |
| Southeastern Medical Oncology Center-Jacksonville    | USA | Atkins, James N.          |
| Sanford Roger Maris Cancer Center                    | USA | Steen, Preston D.         |
| Trinity Cancer Care Center                           | USA | Unnikrishnan, Madhu       |
| Altru Cancer Center                                  | USA | Seeger, Grant Richard     |
| Nebraska Methodist Hospital                          | USA | Leu, Kirsten M. Hotton    |

|                                                                |     |                                |
|----------------------------------------------------------------|-----|--------------------------------|
| CHI Health Saint Francis                                       | USA | Copur, Mehmet Sitki            |
| Southeast Nebraska Cancer Center - 68th Street Place           | USA | Hauke, Ralph J.                |
| Nebraska Hematology and Oncology                               | USA | Soori, Gamini S.               |
| Faith Regional Health Services Carson Cancer Center            | USA | Hauke, Ralph J.                |
| Dartmouth-Hitchcock Medical Center/Norris Cotton Cancer Center | USA | Arrick, Bradley A.             |
| Morristown Medical Center                                      | USA | Reeder, Jennifer G.            |
| Rutgers Cancer Institute of New Jersey                         | USA | Toppmeyer, Deborah Lynn        |
| Lovelace Medical Center-Downtown                               | USA | Dayao, Zoneddy Ruiz            |
| University of New Mexico Cancer Center                         | USA | Dayao, Zoneddy Ruiz            |
| Laura and Isaac Perlmutter Cancer Center at NYU Langone        | USA | Adams, Sylvia                  |
| NYP/Weill Cornell Medical Center                               | USA | Cigler, Tessa                  |
| University of Rochester                                        | USA | Barr, Paul Michael             |
|                                                                |     | Anampa Mesias, Jesus Del Santo |
| Montefiore Medical Center-Einstein Campus                      | USA | Weiselberg, Lora R.            |
| Northwell Health/Center for Advanced Medicine                  | USA | Ramaswamy, Bhuvaneshwari       |
| Ohio State University Comprehensive Cancer Center              | USA | Gerds, Aaron Thomas            |
| Cleveland Clinic Foundation                                    | USA | Shenk, Robert R.               |
| UH Seidman Cancer Center at Southwest General Hospital         | USA | Gross, Howard M.               |
| Kettering Medical Center                                       | USA | Trehan, Shruti                 |
| Aultman Health Foundation                                      | USA | Gross, Howard M.               |
| Miami Valley Hospital North                                    | USA | Gross, Howard M.               |
| Blanchard Valley Hospital                                      | USA | Gross, Howard M.               |
| Dayton Physician LLC-Miami Valley Hospital North               | USA | Shenk, Robert R.               |
| UHHS-Chagrin Highlands Medical Center                          | USA | Gross, Howard M.               |
| Springfield Regional Cancer Center                             | USA | Shenk, Robert R.               |
| Mercy Cancer Center-Elyria                                     | USA | Razaq, Wajeeha                 |
| University of Oklahoma Health Sciences Center                  | USA | Razaq, Wajeeha                 |
| Oklahoma Cancer Specialists and Research Institute-Tulsa       | USA | Mansoor, Abdul Hai             |
| Kaiser Permanente Northwest                                    | USA | Julian, Thomas Benjamin        |
| Allegheny General Hospital                                     | USA | Brufsky, Adam Matthew          |
| University of Pittsburgh Cancer Institute (UPCI)               | USA | Boyle, L. Eamonn               |
| WellSpan Health-York Hospital                                  | USA | Chowdhury, Nabila              |
| Delaware County Memorial Hospital                              | USA | DeNittis, Albert S.            |
| Riddle Memorial Hospital                                       | USA | Domchek, Susan M.              |
| University of Pennsylvania/Abramson Cancer Center              | USA | Obeid, Elias                   |
| Fox Chase Cancer Center                                        | USA | Cescon, Terrence Paul          |
| Reading Hospital                                               | USA | Rovito, Marc A.                |
| Penn State Health Saint Joseph Medical Center                  | USA | DeNittis, Albert S.            |
| Paoli Memorial Hospital                                        | USA | DeNittis, Albert S.            |
| Lankenau Medical Center                                        | USA | Vogel, Victor G.               |
| Geisinger Wyoming Valley/Henry Cancer Center                   | USA | Julian, Thomas Benjamin        |
| Jefferson Hospital                                             | USA | Boyle, L. Eamonn               |
| Adams Cancer Center                                            | USA | Baez-Diaz, Luis                |
| San Juan City Hospital                                         | USA | Brescia, Frank J.              |
| Medical University of South Carolina                           | USA | Doster, John Eric              |
| AnMed Health Cancer Center                                     | USA |                                |



|                                                                     |     |                           |
|---------------------------------------------------------------------|-----|---------------------------|
| Saint Francis Cancer Center                                         | USA | Siegel, Robert D.         |
| Sanford USD Medical Center - Sioux Falls                            | USA | Steen, Preston D.         |
| Scott and White Memorial Hospital                                   | USA | Wong, Lucas               |
| Houston Methodist Hospital                                          | USA | Patel, Tejal              |
| Baylor College of Medicine/Dan L Duncan Comprehensive Cancer Center | USA | Nangia, Julie Rani        |
| Texas Tech University Health Sciences Center-Lubbock                | USA | Jones, Catherine Anne     |
| McKay-Dee Hospital Center                                           | USA | Cannon, George M.         |
| Utah Valley Regional Medical Center                                 | USA | Cannon, George M.         |
| Virginia Commonwealth University/Massey Cancer Center               | USA | Bear, Harry Douglas       |
| Centra Lynchburg Hematology-Oncology Clinic Inc                     | USA | Bear, Harry Douglas       |
| VCU Community Memorial Health Center                                | USA | Bear, Harry Douglas       |
| Hematology Oncology Associates of Fredericksburg Inc                | USA | Bear, Harry Douglas       |
| Inova Schar Cancer Institute                                        | USA | Harnden, Kathleen Kiernan |
| University of Vermont and State Agricultural College                | USA | Wood, Marie Elizabeth     |
| Central Vermont Medical Center                                      | USA | Wood, Marie Elizabeth     |
| Swedish Medical Center-First Hill                                   | USA | Alluri, Krishna Chaitanya |
| Providence Regional Cancer System-Centralia                         | USA | Bridges, Benjamin Buckner |
| Seattle Cancer Care Alliance at EvergreenHealth                     | USA | Specht, Jennifer Marie    |
| Seattle Cancer Care Alliance                                        | USA | Specht, Jennifer Marie    |
| Kadlec Clinic Hematology and Oncology                               | USA | Alluri, Krishna Chaitanya |
| Aurora Saint Luke's Medical Center                                  | USA | Qamar, Rubina             |
| Saint Vincent Hospital Cancer Center at Saint Mary's                | USA | Ryan, Matthew L.          |
| Mayo Clinic Health System-Franciscan Healthcare                     | USA | Ruddy, Kathryn J.         |
| Aurora Cancer Care-Southern Lakes VLCC                              | USA | Qamar, Rubina             |
| Aurora BayCare Medical Center                                       | USA | Qamar, Rubina             |
| Marshfield Medical Center - Weston                                  | USA | Gayle, Arlene A.          |
| Aurora Cancer Care-Grafton                                          | USA | Qamar, Rubina             |
| Aurora Health Center-Fond du Lac                                    | USA | Qamar, Rubina             |
| West Virginia University Charleston Division                        | USA | Jubelirer, Steven James   |
| Camden Clark Medical Center                                         | USA | Kurian, Sobha             |
| West Virginia University Healthcare                                 | USA | Salkeni, Mohamad Adham    |

### **SABO: SWEDISH ASSOCIATION OF BREAST ONCOLOGISTS**

|                                               |        |                               |
|-----------------------------------------------|--------|-------------------------------|
| Skånes Universitetssjukhus Lund               | Sweden | Niklas Loman                  |
| Sahlgrenska Universitetssjukhuset, Gothenburg | Sweden | Barbro Linderholm             |
| Norrlands Universitetssjukhus, Umeå           | Sweden | Gustav Silander               |
| Linköpings Universitetssjukhus, Linköping     | Sweden | Anna-Lotta Hallbeck           |
| Södersjukhuset, Stockholm                     | Sweden | Anna von Wachenfeldt Våppling |

### **SOLTI**

|                                           |          |                  |
|-------------------------------------------|----------|------------------|
| Hôpital Jean Minjoz                       | France   | Elsa Curtit      |
| IPO Lisboa, Serviço de Oncologia Médica 2 | Portugal | Catarina Cardoso |
| Hospital CUF Descobertas                  | Portugal | Sofia Braga      |
| IPO Porto, Serviço de Oncologia Médica    | Portugal | Miguel Abreu     |

|                                                        |          |                             |
|--------------------------------------------------------|----------|-----------------------------|
| Hospital Beatriz Ângelo, Hospital de Dia Oncologia     | Portugal | Mafalda Casa-Nova           |
| Hospital da Luz                                        | Portugal | Mónica Nave                 |
| Hospital Universitario 12 de Octubre                   | Spain    | Eva María Ciruelos Gil      |
| Hospital Vall d'Hebron                                 | Spain    | Judith Balmaña Gelpi        |
| Institut Catala d'Oncologia Hospitalet                 | Spain    | Adela Fernández Ortega      |
| Hospital San Joan de Reus                              | Spain    | Josep Gumà Padró            |
| Hospital Clínico Universitario de Valencia             | Spain    | Begoña Bermejo de las Heras |
| Usp Institut Universitari Dexeus                       | Spain    | María González Cao          |
| Complejo Hospitalario Universitario de Santiago (CHUS) | Spain    | Juan Cueva Bañuelos         |
| Hospital Universitario Son Espases                     | Spain    | Jesús Alarcon Company       |
| Hospital Josep Trueta                                  | Spain    | Gemma Viñas Villaró         |
| MD Anderson Cancer Center                              | Spain    | Laura García Estevez        |

## SUCCESS

|                                                     |         |                        |
|-----------------------------------------------------|---------|------------------------|
| Universitätsklinikum Ulm                            | Germany | Jens Huober            |
| Brustzentrum Mittelthüringen                        | Germany | Steffi Busch           |
| Universitätsklinikum Düsseldorf                     | Germany | Tanja Fehm             |
| Stadtklinik Baden-Baden                             | Germany | Antje Hahn             |
| Südharz-Krankenhaus Nordhausen gGmbH                | Germany | Andrea Grafe           |
| Kreiskrankenhaus Hameln                             | Germany | Thomas Noesselt        |
| Klinikum Gifhorn GmbH                               | Germany | Thomas Dewitz          |
| Gemeinschaftspraxis Drs. med. Wilke/Wagner          | Germany | Harald Wagner          |
| Klinikum Memmingen                                  | Germany | Christina Bechtner     |
| Leopoldina-Krankenhaus der Stadt Schweinfurt        | Germany | Michael Weigel         |
| Marienhospital Bottrop gGmbH                        | Germany | Hans-Christian Kolberg |
| Onkologie Ravensburg                                | Germany | Thomas Decker          |
| Institut für Versorgungsforschung in der Onkologie  | Germany | Jörg Thomalla          |
| Diakoniekrankenhaus Rotenburg (Wümme) gGmbH         | Germany | Tobias Hesse           |
| Klinikum der Ludwig-Maximilians-Universität München | Germany | Nadia Harbeck          |
| Onkologische Schwerpunktpraxis Mülheim              | Germany | Jan Schröder           |
| Charité - Universitätsmedizin Berlin                | Germany | Jens-Uwe Blohmer       |
| Universitätsklinikum Mannheim                       | Germany | Marc Wolf Sütterlin    |
| SweBCG Swedish Breast Cancer Group                  |         |                        |
| Karolinska Universitetssjukhuset, Solna             | Sweden  | Renske Altena          |

## TCOG: TAIWAN COOPERATIVE ONCOLOGY GROUP

|                                                         |        |                   |
|---------------------------------------------------------|--------|-------------------|
| China Medical University Hospital                       | Taiwan | Chang-Fang Chiu   |
| Chang-Gung Medical Foundation Linkou                    | Taiwan | Shin-Cheh Chen    |
| Kaohsiung Medical University Chung-Ho Memorial Hospital | Taiwan | Ming-Feng Hou     |
| Mackay Memorial Hospital                                | Taiwan | Yuan-Ching Chang  |
| Chi Mei Hospital-Liou Yin                               | Taiwan | Shang-Hung Chen   |
| Changhua Christian Hospital                             | Taiwan | Shou-Tung Chen    |
| National Taiwan University Hospital                     | Taiwan | Chiun-Sheng Huang |
| Veterans General Hospital Taichung                      | Taiwan | Dah-Cherng Yeh    |
| Triple Service General Hospital                         | Taiwan | Jyh-Cherng Yu     |

|                                                |        |                 |
|------------------------------------------------|--------|-----------------|
| Veteran General Hospital Taipei                | Taiwan | Ling-Ming Tseng |
| National Cheng Kung University (NCKU) Hospital | Taiwan | Wei-Pang Chung  |

### UCBG: UNICANCER BREAST GROUP

|                                                      |        |                           |
|------------------------------------------------------|--------|---------------------------|
| Centre Oscar Lambret                                 | France | Audrey Mailliez           |
| Centre Paul Strauss                                  | France | Thierry Petit             |
| Institut Gustave Roussy                              | France | Suzette DELALOGÉ          |
| Centre François Baclesse                             | France | Christelle Lévy           |
| Hôpital Européen de Marseille                        | France | Philippe Dalivoust        |
| Institut Paoli Calmettes                             | France | Jean-Marc Extra           |
| Centre Jean Perrin                                   | France | Marie-Ange Mouret-Reynier |
| Centre CARIO-HPCA                                    | France | Anne-Claire Hardy-Bessard |
| CHU Morvan-Institut de Cancerologie et d'Hematologie | France | Hélène Simon              |
| Centre Hospitalier Départemental Les Oudairies       | France | Tiffenn L'Haridon         |
| Institut Sainte Catherine                            | France | Alice Mege                |
| Hôpital Saint Louis                                  | France | Sylvie Giacchetti         |
| Institut Bergonié                                    | France | Camille Chakiba-Brugere   |
| Clinique Pasteur                                     | France | Alain Gratet              |
| Centre Léonard de Vinci                              | France | Virginie Pottier          |
| Centre Antoine Lacassagne                            | France | Jean-Marc FERRERO         |
| Centre Henri Becquerel                               | France | Isabelle Tennevet         |
| Centre Eugène Marquis                                | France | Christophe Perrin         |

### INDEPENDENT SITES

|                                                              |         |                |
|--------------------------------------------------------------|---------|----------------|
| Grand Hôpital de Charleroi (GHdC)                            | Belgium | Jean-Luc Canon |
| Universitair Ziekenhuis Brussel                              | Belgium | Sofie Joris    |
| Fudan University Shanghai Cancer Center                      | China   | Zhimin Shao    |
| Cancer Hospital, CAMS&PUMC                                   | China   | Binghe Xu      |
| PLA 307 hospital                                             | China   | ZeFei Jiang    |
| Peking Union Medical College Hospital                        | China   | Qiang Sun      |
| Ruijin hospital Shanghai Jiaotong University of medicine     | China   | Kunwei Shen    |
| Harbin Medical University Cancer Hospital                    | China   | Da Pang        |
| Tianjin Medical University Cancer Institute and Hospital     | China   | Jin Zhang      |
| Jiangsu Province Hospital                                    | China   | Shui Wang      |
| Zhejiang Cancer Hospital                                     | China   | Hongjian Yang  |
| Guangdong Provincial People's Hospital                       | China   | Ning Liao      |
| West China Hospital, Sichuan University                      | China   | Hong Zheng     |
| The 1st Affiliated Hospital of Medical School of Zhejiang Un | China   | Peifen Fu      |
| The Union Hospital affiliated to Fujian Medical University   | China   | Chuangui Song  |
| ShanDong Cancer Hospital                                     | China   | Yongsheng Wang |
| The First Hospital of Jilin University                       | China   | Zhimin Fan     |
| Hebei Medical University Fourth Hospital                     | China   | Cuizhi Geng    |

|                                                            |             |                         |
|------------------------------------------------------------|-------------|-------------------------|
| Centre Léon Bérard                                         | France      | Olivier Tredan          |
| Uzsoki utcai Kórház                                        | Hungary     | László Landherr         |
| Chaim Sheba Medical Centre at Tel Hashomer                 | Israel      | Bella Kaufman           |
| Rabin Medical Center                                       | Israel      | Rinat Yerushalmi        |
| Hadassah Hebrew University Medical Center                  | Israel      | Beatrice Uziely         |
| Istituto Oncologico Veneto                                 | Italy       | Pierfranco Conte        |
| A.O.U. di Bologna – Policlinico Sant'Orsola-Malpighi       | Italy       | Claudio Zamagni         |
| Ospedale S. Raffaele - Milano                              | Italy       | Giampaolo Bianchini     |
| Istituto Nazionale Tumori Fondazione Pascale IRCCS         | Italy       | Michelino De Laurentiis |
| Ospedali Riuniti - Azienda Ospedaliera Papa Giovanni XXIII | Italy       | Carlo Tondini           |
| La Maddalena Clinic For Cancer University Of Palermo       | Italy       | Vittorio Gebbia         |
| Azienda Ospedaliera Vito Fazzi                             | Italy       | Mariangela Ciccarese    |
| Magodent Szpital Elbląska                                  | Poland      | Tomasz Sarosiek         |
| Med Polonia Sp.Z.o.o NSZOZ                                 | Poland      | Jacek Mackiewicz        |
| SPZOZ MSWiA z Warmińsko-Mazurskim Centrum Onkologii        | Poland      | Anna Słowińska          |
| Instytut Centrum Zdrowia Matki Polki                       | Poland      | Ewa Kalinka             |
| Niepubliczny Zakład Opieki Zdrowotnej Innowacyjna Medycyna | Poland      | Tomasz Huzarski         |
| Seoul National University Hospital                         | South Korea | Seock-Ah Im             |
| Asan Medical Center                                        | South Korea | Kyung Hae Jung          |
| Yonsei University Severance Hospital                       | South Korea | Joo Hyuk Sohn           |
| Seoul National University Bundang Hospital                 | South Korea | Jee Hyun Kim            |
| National Cancer Center                                     | South Korea | Keun Seok Lee           |
| Samsung Medical Center                                     | South Korea | Yeon Hee Park           |
| Ewha Womans University Mokdong Hospital                    | South Korea | Kyoung Eun Lee          |
| Chilgok Kyungpook National University Medical Center       | South Korea | Yee Soo Chae            |
| Gachon University Gil Hospital                             | South Korea | Eun Kyung Cho           |

---

### 3. SUPPLEMENTARY METHODS

#### 3.1 DUAL PLATFORM MODEL USED TO CONDUCT THE OLYMPIA TRIAL

This trial was conducted as a partnership between academia, non-profit organisations, government agencies, participating hospitals and industry. The Breast International Group (BIG), Frontier Science and Technology Research Foundation (and its Affiliate, Frontier Science (Scotland) Ltd), the National Cancer Institute, NRG Oncology and AstraZeneca have all played key roles. The guiding principles for the conduct of the study are those of BIG and NRG/ NCI. Data is collected, reviewed and analysed following the Standard Operating Procedures of Frontier Science (non-profit organisation) and NRG/ NCI. All of these organisations have representation on the trial Steering Committee along with representatives of the geographic areas involved in the trial and consumer representatives. A detailed Publication Policy governs all publications using trial data and decisions to publish come from the Steering Committee, not from any individual or individual organization.

Two protocols, identical in terms of study objectives and scientific content differing only in logistical and regulatory content appropriate for the country(ies) they covered (eg. drug distribution, mechanisms for SAE reporting during the study, etc), are employed in the study. The protocol under AZ sponsorship covers all patients recruited from non-US sites and the protocol under NRG sponsorship covers patients within the US. The protocols were developed as a collaboration between the partners described above.

The trial used a single randomization system hosted by Frontier Science (FS) and is reported as one study. Randomization was done using a permuted block algorithm with block-size 4. The randomization system has a built-in random number generator to start the allocations, and blocks are generated randomly as they are required, so there are no random lists generated ahead of time. Non-US sites used the FS front end to get into the randomization system. US sites used the NCI OPEN system which collected pre-randomization information and then connected to the FS system to complete randomization. All patients, treating physicians, and study personnel were blinded to treatment allocation with exception of the Independent Statistical Center, which was provided with treatment codes by the randomization system administrator in order to prepare reports for the Independent Data Monitoring Committee (IDMC).

The collection of the patient data is done using two instances of Rave EDC system (one for the US patients, maintained by NRG, and one for all other patients outside of the US, maintained by FS)). FS and NRG collaborated on the design of the two databases and the respective eCRFs to ensure as much consistency as possible in the data collection. Some differences have been necessary due to differences in company and/or regional data collection standards and these differences are all documented in consistency documentation maintained by AZ. Quality control of the data is done by Frontier Science and NRG for the respective Rave instances. The data from both databases are routinely combined into a single consolidated database at regular intervals. All statistical analyses as well as reports for periodic review by the IDMC have been conducted and reported from the single consolidated database, built, maintained and held by Frontier Science. The Sponsors (NRG/ NCI and AstraZeneca) had no access to this database during the conduct of the trial. Subsets of blinded data were provided for specific purposes as required, e.g. DSUR reporting data to AZ and a subset of PRO data to NRG to allow them to test analysis programs.

---

## 3.2 ELIGIBILITY CRITERIA

### Inclusion criteria

1. Provision of informed consent prior to any study specific procedures
  2. Female or male patients must be  $\geq 18$  years of age
  - 3A. For patients who underwent initial surgery and received adjuvant chemotherapy
    - TNBC patients must have been axillary node-positive ( $\geq pN1$ , any tumour size) or axillary node-negative (pN0) with invasive primary tumour pathological size  $> 2$  cm ( $\geq pT2$ )
    - ER and/or PgR positive/HER 2 negative patients must have had  $\geq 4$  pathologically confirmed positive lymph nodes
  - 3B. For patients who underwent neoadjuvant chemotherapy followed by surgery
    - TNBC patients must have residual invasive breast cancer in the breast and/or resected lymph nodes (non pCR)
    - ER and/or PgR positive/HER 2 negative patients must have residual invasive cancer in the breast and/or the resected lymph nodes (non pCR) AND a CPS&EG score  $\geq 3$ . Instructions how to calculate CPS&EG score ([Mittendorf et al 2011](#); [Jeruss et al 2008](#)) are provided in [Appendix 4](#) in the protocol.
  4. Histologically confirmed non-metastatic primary invasive adenocarcinoma of the breast that is one of the two following phenotypes:
    - a) TNBC defined as:
      - ER and PgR negative defined as IHC nuclear staining  $< 1\%$ .
    - AND**
      - HER2 negative (not eligible for anti-HER2 therapy) defined as:
        - o IHC 0, 1+ without ISH **OR**
        - o IHC 2+ and ISH non-amplified with ratio less than 2.0 and if reported, average HER2 copy number  $< 4$  signals/cells **OR**
        - o ISH non-amplified with ratio less than 2.0 and if reported, average HER2 copy number  $< 4$  signals/cells (without IHC)
    - b) ER and/or PgR positive, HER2 negative breast cancer defined as:
      - ER and/or PgR positive defined as IHC nuclear staining  $\geq 1\%$ .
    - AND**
      - HER2 negative (not eligible for anti-HER2 therapy) defined as:
        - o IHC 0, 1+ without ISH **OR**
        - o IHC 2+ and ISH non-amplified with ratio less than 2.0 and if reported, average HER2 copy number  $< 4$  signals/cells **OR**
        - o ISH non-amplified with ratio less than 2.0 and if reported, average HER2 copy number  $< 4$  signals/cells (without IHC)
- Patients with multifocal or multicentric invasive disease are eligible as long as all the lesions for which HER2 characterization is available are HER2 negative.

---

Patients with synchronous bilateral invasive disease are eligible as long as all the lesions assessed for HER2 on both sides are negative.

In both the above cases the lesion considered at highest risk for recurrence based on the investigator's discretion will be used for eligibility determination.

5. Documented germline mutation in *BRCA1* or *BRCA2* that is predicted to be deleterious or suspected deleterious (known or predicted to be detrimental/lead to loss of function).

Local *gBRCA* testing results, if available, will be used for establishing eligibility. If local *gBRCA* testing results are not available, central testing will be provided for those patients who otherwise appear to be eligible (see Section 6.2.1 in the protocol).

- 6A. Completed adequate breast surgery defined as:

- The inked margins of breast conservation surgery or mastectomy must be histologically free of invasive breast cancer and ductal carcinoma in situ with the exception of the posterior margin if this margin is the pectoralis major fascia or the anterior margin if this is the dermis. Patients with resection margins positive for lobular carcinoma *in situ* are eligible.
- Patients with breast conservation must have adjuvant radiotherapy. Patients having mastectomy may have adjuvant radiotherapy according to local policy and/or international guidelines.

- 6B. Completed adequate axilla surgery defined as:

Adjuvant Chemotherapy Patients:

- Sentinel lymph node biopsy alone if negative or if lymph node(s) only contain micrometastases ( $\leq 2.0$  mm) **OR**
- Positive sentinel lymph node biopsy followed by axillary nodal dissection or radiotherapy as per local guidelines **OR**
- Axillary dissection

Neoadjuvant Chemotherapy Patients:

- Sentinel lymph node biopsy performed *before* neoadjuvant chemotherapy:
  - o If negative or if lymph node(s) only contain micrometastases ( $\leq 2.0$  mm) additional axillary surgery is not required
  - o If positive, axillary node dissection or axillary nodal radiotherapy should follow completion of neoadjuvant chemotherapy
- Sentinel lymph node biopsy performed *after* neoadjuvant chemotherapy:
  - o If negative, additional axillary surgery not mandated
  - o If positive (micrometastases are regarded as positive), additional axillary surgery is required unless the patient is enrolled in a Phase III multicenter clinical trial proposing radiotherapy as alternative treatment of the axilla. The trial must be pre-approved by the OlympiA Executive Committee
- Axillary dissection

7. Completed at least 6 cycles of neoadjuvant or adjuvant chemotherapy containing anthracyclines, taxanes or the combination of both. Prior platinum as potentially curative treatment for prior cancer (e.g. ovarian)

---

or as adjuvant or neoadjuvant treatment for breast cancer is allowed. (For neoadjuvant patients all chemotherapy should be delivered prior to surgery. No further cycles of chemotherapy post surgery are allowed.)

8. Patients must have adequate organ and bone marrow function measured within 28 days prior to randomisation with no blood transfusions (packed red blood cells and/or platelet transfusions) in the past 28 days prior to testing for organ and bone marrow function as defined below:

- Haemoglobin  $\geq 10.0$  g/dL
- Absolute neutrophil count (ANC)  $\geq 1.5 \times 10^9/L$
- Platelet count  $\geq 100 \times 10^9/L$
- Total Bilirubin  $\leq$  ULN (institutional upper limit of normal) except elevated total bilirubin  $< 1.5 \times$  ULN due to Gilbert's disease or similar syndrome involving slow conjugation of bilirubin
- AST (SGOT)/ALT (SGPT)  $\leq 2.5 \times$  ULN
- ALP  $\leq 2.5 \times$  ULN

To rule out metastatic breast cancer, patients with screening ALT/AST or ALP above institutional upper limit of normal should have liver ultrasound, CT or MRI at any time point between diagnosis of current breast cancer and randomisation.

Screening bone scan is required if ALP and/or corrected calcium level are above the institutional upper limit. (Note: PET CT scan may be used as an alternative imaging technique).

9. Serum or plasma creatinine  $\leq 1.5 \times$  ULN

10. ECOG performance status 0-1

11A. Women who are not postmenopausal or have not undergone hysterectomy must have documented negative pregnancy test within 28 days prior to randomisation:

Postmenopausal is defined as:

- Age  $\geq 60$  years
- Age  $< 60$  years and amenorrhic for 1 year or more in the absence of chemotherapy and/or hormonal treatment
- Follicle stimulating hormone (FSH) and plasma estradiol levels in the postmenopausal range for women under 60 years
- Radiation-induced oophorectomy with last menses  $> 1$  year ago
- Bilateral oophorectomy

11B. Women of child bearing potential and their partners, who are sexually active, must agree to the use of two highly effective forms of contraception in combination. This should be started from the signing of the informed consent and continue, throughout the period of taking study treatment and for at least 1 month after last dose of study drug, or they must totally/truly abstain from any form of sexual intercourse. Male patients must use a condom during treatment and for 3 months after last dose of study drug when having sexual intercourse with a pregnant woman or with a woman of childbearing potential. Female partners of male patients should also use a highly effective form of contraception (see [Appendix E](#) in the protocol for acceptable methods) if they are of childbearing potential.

12. Patient is willing and able to comply with the protocol for the duration of the study including undergoing treatment and scheduled visits and examinations



---

13. Formalin fixed, paraffin embedded (FFPE) tumour sample from the primary tumour, mandatory\*.

\*NOTE: For adjuvant patients, this refers to the surgical specimen; for neoadjuvant patients, both the pre-treatment core biopsy and the surgical specimen with residual disease are requested but only one is mandatory. If the surgery tumour blocks are available, but cannot be submitted, sites may submit a portion of invasive tumour from the original block, either by taking at least one core of at least 3 mm in diameter, or by splitting the original block in two parts, and re-embedding one in a new block for central submission. If blocks containing pre-neoadjuvant treatment core biopsies are available but cannot be submitted, sections mounted on glass slides prepared from the block can be provided. If tumour sample can't be provided as requested above or if it's not available, approval by Study Team for patient's entry into the trial is required.

14. Patient should be randomised in the trial ideally within a maximum of 8 weeks of completion of their last treatment (surgery, chemotherapy or radiotherapy), but in no case longer than 12 weeks.

---

### **Exclusion criteria (protocol text abbreviated)**

1. Involvement in the planning and/or conduct of the study
2. BRCA1 and/or BRCA2 mutations that are considered non detrimental
3. Previous randomisation in the present study
4. Evidence of metastatic breast cancer
5. Exposure to an investigational product within 30 days or 5 half-lives (whichever is longer) prior to randomisation
6. Previous treatment with a PARP inhibitor and/or known hypersensitivity to any of the excipients of study treatment
7. Patients with second primary cancer, unless they meet protocol-specified exceptions
8. Resting ECG with QTc > 470 msec detected on 2 or more time points within a 24-hour period or family history of long QT syndrome
9. Patients receiving systemic chemotherapy within 3 weeks prior to randomisation
10. Patients receiving adjuvant radiotherapy within 2 weeks prior to randomisation
11. Concomitant use of known strong or moderate CYP3A inhibitors or Concomitant use of known strong or moderate CYP3A inducers.
12. Persistent toxicities ( $\geq$ CTCAE grade 2) caused by previous cancer therapy
13. Patients with current or past history of hematologic malignancies and any clonal non-malignant haematological disorder which predisposes the patient to develop a haematological malignancy. Exception: lymphoma (refer to Exclusion Criterion 7).
14. Major surgery within 2 weeks of starting study treatment
15. Patients considered a poor medical risk due to a serious, uncontrolled medical disorder, non-malignant systemic disease or active, uncontrolled infection
16. Patients unable to swallow orally administered medication and patients with gastrointestinal disorders likely to interfere with absorption of the study medication
17. Pregnant or breastfeeding women
18. Patients with known active Hepatitis B or C or HIV
19. Previous allogeneic bone marrow transplant
20. Whole blood transfusions in the last 120 days prior to entry to the study which may interfere with gBRCA testing

---

### 3.3 CALCULATION FOR THE CPS&EG STAGING SYSTEM

The CPS&EG score is a staging system for disease specific survival in patients with breast cancer treated with neoadjuvant chemotherapy.<sup>1</sup> This incorporates pretreatment clinical stage, estrogen receptor status, nuclear grade and post-neoadjuvant chemotherapy pathological stage.

Calculation instructions: Add the points for Clinical Stage + Pathologic Stage + ER status + Nuclear grade to derive a sum (CPS&EG score) between 0 and 6.

| Stage/feature                                 |                 | Points |
|-----------------------------------------------|-----------------|--------|
| <b>Clinical Stage</b><br>(AJCC staging [1])   | 0               | 0      |
|                                               | IIA             | 0      |
|                                               | IIB             | 1      |
|                                               | IIIA            | 1      |
|                                               | IIIB            | 2      |
|                                               | IIIC            | 2      |
| <b>Pathologic Stage</b><br>(AJCC staging [1]) | 0               | 0      |
|                                               | I               | 0      |
|                                               | IIA             | 1      |
|                                               | IIB             | 1      |
|                                               | IIIA            | 1      |
|                                               | IIIB            | 1      |
|                                               | IIIC            | 2      |
| Receptor status                               | ER negative [2] | 1      |
| Nuclear grade [3]                             | Nuclear grade 3 | 1      |

[1] AJCC: American Joint Committee on Cancer (<https://cancerstaging.org/Pages/default.aspx>).

[2] ER: Estrogen receptor; definitions for ER negativity see eligibility criteria in the protocol Section 4.1.4.a.

---

[3] In the unlikely situation nuclear grade cannot be determined, regular histologic grade should be used; if only Nottingham overall grade is reported, the Nottingham overall grade must be 9 to be scored as 1 point in the CPS&EG score (<http://pathology.jhu.edu/breast/grade.php>).

---

### 3.4 POOLING STRATEGY FOR STRATIFICATION FACTORS

The primary stratified log-rank test of IDFS will be based on the stratification factors determined from the following pooling strategy.

In the event that there are fewer than 5 IDFS events per treatment arm within any individual stratum (initially starting with 16 strata;  $16=2 \times 2 \times 2 \times 2$  including treatment group), one stratification factor will be removed at a time until there are at least 5 IDFS events within each individual stratum in the following order:

1. Prior platinum use for breast cancer (yes/no)
2. Prior chemotherapy (neo-adjuvant vs. adjuvant)
3. Hormone receptor status (ER and/or PgR positive/HER2 negative vs. TNBC)

**Result:** When all three factors were included, there were strata with fewer than 5 IDFS events per treatment arm. Hence, prior platinum was removed as a stratification factor. When the remaining two factors were included, there were strata with fewer than 5 IDFS events per treatment arm. Hence, prior chemotherapy was removed as a stratification factor. Therefore, the primary stratified Cox proportional hazards model and the stratified log-rank test of IDFS were based on the stratification factor of hormone receptor status only.

---

### 3.5 SENSITIVITY ANALYSES

The protocol specified that seven (7) sensitivity analyses were to be performed if specific criteria were met. In this section we describe the sensitivity analyses, and, for those that met the criteria for conducting the sensitivity analysis, results are presented in tables within this Supplementary Appendix.

#### **1: Confirmed (central Myriad test) germline *BRCA1* and *BRCA2* deleterious/suspected deleterious variant**

The protocol specified that, If applicable, an analysis would be performed for IDFS based on all randomised patients confirmed to have *BRCA1* or *BRCA2* germline deleterious/suspected deleterious variant (gBRCA-D/SD-variant) by the central Myriad test. This analysis is only required if the analysis population differs from the primary ITT population (i.e. only required if any of the randomised patients are not confirmed to have gBRCA-D/SD-variant by the central Myriad test).

1539 patients had a Myriad confirmed gBRCA D/SD variant (see Table S2A in this Supplementary Appendix).

**Results:** The results of this analysis are presented within Table S9 in this Supplementary Appendix.

#### **2: Mis-stratification in the randomisation system**

Any patients mis-stratified in the randomisation system (i.e. incorrect details are entered at the time of randomisation) were included in the primary stratified analysis based on the information from the randomisation system. Cross-tabulations of stratification factors from the randomisation system and the correct baseline data from the eCRF were performed. If >5% of randomised patients are incorrectly stratified (i.e. randomisation system data does not match baseline data confirmed in the eCRF) then a sensitivity analysis would be performed for IDFS using the same model as described above but using the eCRF information instead of the randomisation system information. [Note: For all patients, the characteristics reported in the eCRF were used to determine subgroups for the subgroup analyses, while the randomisation system information was used to stratify the logrank and Cox model analyses.]

In accordance with the pooling strategy only hormone receptor status was fitted as a stratification factor. Of the 1836 in the ITT population, 32 (1.7%) had discordant hormone receptor status between what was reported in the randomisation system and what was reported on the eCRF.

**Results:** Because the 5% threshold was not met, this sensitivity analysis was not performed.

#### **3: Central pathology review**

The protocol specified that if the results of ER and PgR status from the local and central labs differ in >5% of randomised patients, then a sensitivity analysis would be performed for IDFS using the same model as described above, but using the central lab result to determine the HR status stratification factor and compared with the primary analysis result.

---

Of the 1452 patients that have both a central and a local hormone receptor status, 147 (10%) have discordant results (Table S5 in this Supplementary Appendix). 247 patients did not have material available for central pathology review because of regulatory requirements by authorities in China. Central receptor status review results excluding patients from China are shown in Table S4 in this Supplementary Appendix.

**Results:** Because the 5% threshold for discordance between local and central hormone receptor status was met, this sensitivity analysis was performed. The results of this analysis are presented in Table S9 in this Supplementary Appendix.

#### **4: Important protocol deviations (IPDS)**

Important protocol deviations (IPD)s are a concise list of pre-defined protocol deviations which have a very high likelihood of influencing the primary efficacy and/or the secondary safety results. The protocol stated that a 'deviation bias' sensitivity analysis may be performed excluding patients with IPD's that may affect the efficacy of the trial therapy. This sensitivity analysis would be performed excluding patients with IPD's that may affect the efficacy of the trial therapy if > 10% of patients in either treatment group did not have the intended disease or indication or did not receive any randomised therapy.

Of the 1836 patients in the ITT population, 30 (1.6%) did not have intended disease or indication, or did not receive any randomised treatment (see Table S18 in this Supplementary Appendix).

**Results:** Because the 10% threshold for IPDs was not met, this sensitivity analysis was not performed.

#### **5. Unadjusted analysis**

The protocol stated that an unadjusted (unstratified Cox model) analysis would be performed as a sensitivity analysis and compared with the primary results.

**Results:** This unstratified Cox model analysis was performed. The results of this analysis are presented in Table S9 in this Supplementary Appendix.

#### **6. Assumption of proportional hazards**

The protocol stated that the assumption of proportional hazards underlying the log-rank test and the Cox model used for the primary analysis would be assessed. Proportionality will be assessed using two approaches, firstly by inspecting plots of complementary log-log (time) versus log (time) and secondly by formally testing using the Grambsch–Therneau test (G-T) based on scaled Schoenfeld residuals from a Cox model including treatment group as a factor. If the G-T test is significant ( $p < 0.05$ ), and proportionality is rejected, Restricted Mean Survival Time (RMST) methods would be used to estimate and test the treatment difference while allowing for non-proportional hazards.

**Results:** The G-T tests reached the  $p < 0.05$  threshold. This indicates that proportional hazards cannot be assumed. a rejection of the null hypothesis of proportional hazards. The p-value for the G-T test with identity transformation of time was  $p = 0.02$ , and the p-value for the G-T test with rank transformation of time was  $p = 0.02$  (see Table S9 in this Supplementary Appendix).

---

Because the null hypothesis of proportionality was rejected, as specified in the Statistical Analysis Plan, a sensitivity analysis was performed based on the restricted mean survival time (RMST) method, restricting the calculation of RMST to within the first 4.1 years (49 months) of follow-up. The restriction time was defined as the minimum of the maximum of the longest IDFS event time between the two treatment groups. Under non-proportional hazards, the estimated hazard ratio can be interpreted as an average hazard ratio over the observed follow-up period. This hazard ratio may under and overestimate the hazard during different periods of the follow-up. The results of the RMST analysis reach the same conclusion as the main analysis of IDFS, that there is a treatment benefit for the olaparib group. The results of the RMST analysis is presented in Table S9 in this Supplementary Appendix.

## **7. Interval censored cox regression**

The protocol stated that an interval censored analysis would be performed as a sensitivity analysis and compared with the primary results. Patients whose visit schedule has not been according to the protocol are fitted in the Cox model using interval censoring,

- For patients experiencing an event, and without follow-up according to the protocol (defined as over 18 months between the event and the last visit), the interval from the last date at which the subject was known to be IDFS free to the date of recurrence or death, will be used.
- For patients that were previously censored, or had an event and were seen according to the protocol defined visit schedule, the lower limit of the interval will be set to the censoring/event date, while the upper limit will be set to missing.

**Results:** No patients met the criteria to initiate this sensitivity analysis.



## 4. SUPPLEMENTARY FIGURES

FIGURE S1: OLYMPIA TRIAL SCHEMA

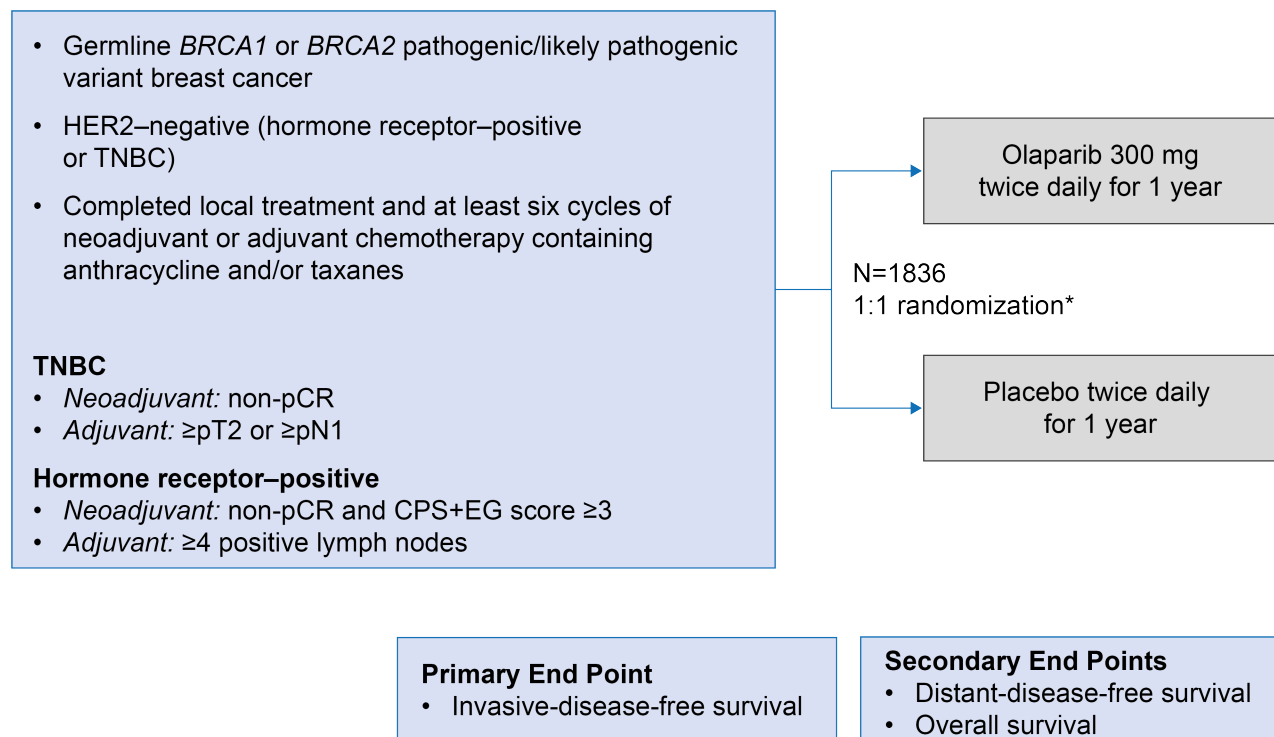

CPS+EG score (see Section 3.3) incorporates pretreatment clinical stage, estrogen receptor status, nuclear grade and pathological stage after neoadjuvant chemotherapy<sup>1</sup>; HER2 denotes human epidermal growth factor receptor 2; pCR denotes pathologic complete response; TNBC denotes triple negative breast cancer.

\* Stratification factors: (i) hormone receptor–positive vs. TNBC; (ii) neoadjuvant vs. adjuvant; (iii) prior platinum-based chemotherapy (yes vs. no).

**FIGURE S2: AVAILABILITY OF BRCA TESTING RESULTS: LOCALLY (INCLUDING BGI GENOMICS FOR ALL PATIENTS IN CHINA) AND CENTRALLY BY MYRIAD GENETICS [1]**

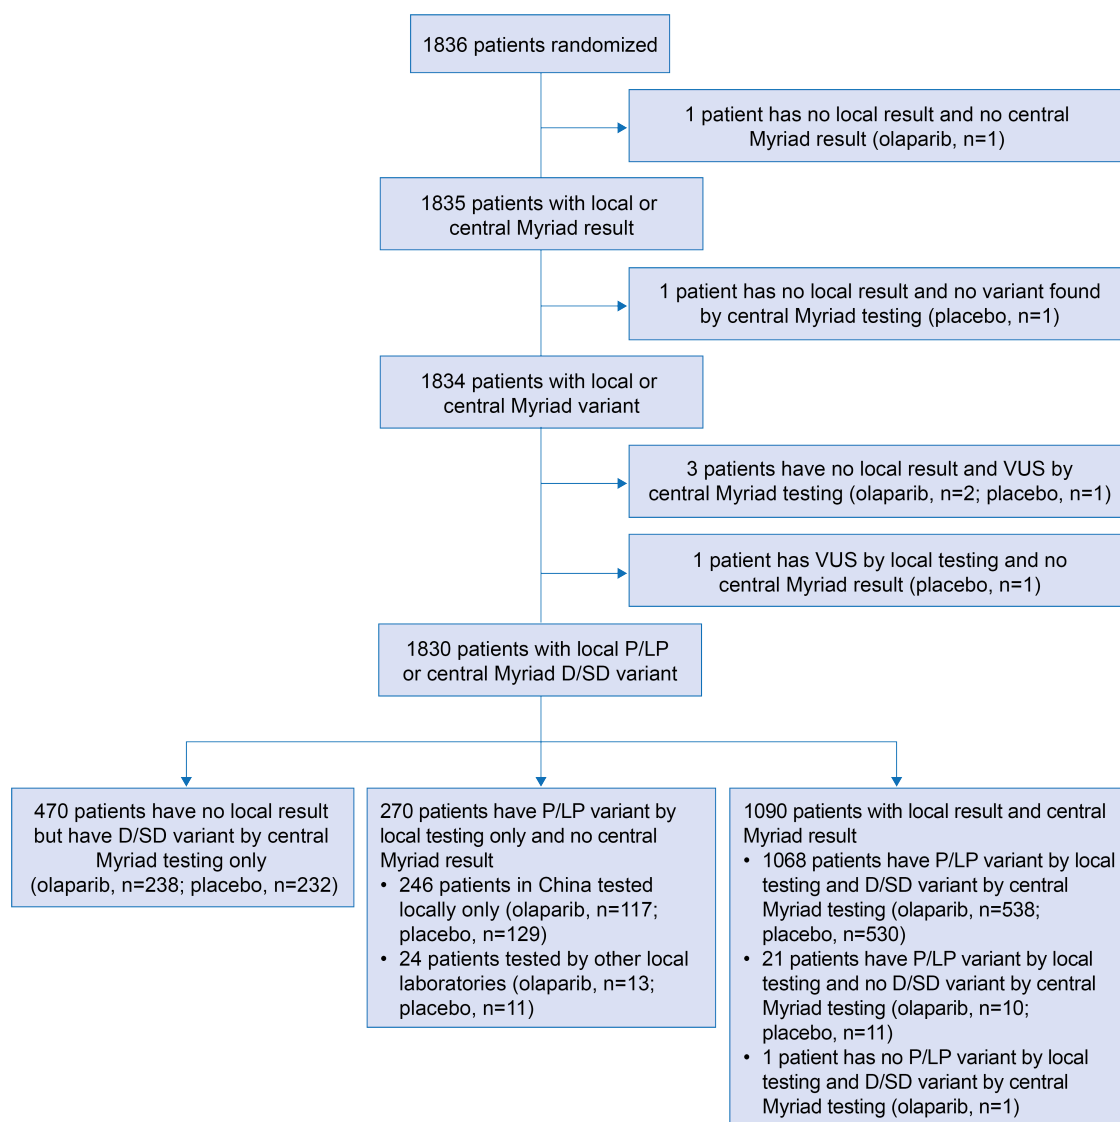

---

[1] This schema illustrates the availability of *BRCA1* and *BRCA2* testing in OlympiA. If testing results were not available for patients who otherwise appeared to be eligible, screening was conducted using BGI Genomics in China and Myriad elsewhere. 6 patients who enrolled in the study without confirmed evidence of a gBRCA-P/LP (D/SD)-variant are described in the top 4 boxes on the right side of the figure (the 1 patient with VUS was screened in China at BGI Genomics). The bottom 3 boxes describe 470 patients with gBRCA-D/SD-variant by central Myriad test but no local result available, 270 patients with gBRCA-P/LP-variant by local test but no central Myriad test result available (246 of whom were screened in China at a single laboratory - BGI Genomics), and 1090 patients with both local and central Myriad results available, showing that 22 of these 1090 patients (2.0%) had discordant local versus central results. Please see Table S2B for the P/LP (D/SD) BRCA 1/2 variants occurring in more than 1 patient. These have been reviewed by a Genetic Advisory Committee made up of academic cancer geneticists and oncologists independent of the sponsors and Co-chaired by J Garber (Co-PI and author) and J Balmana (author) with membership listed on page 4).

**FIGURE S3: MULTIPLE TESTING PROCEDURE AT THE INTERIM ANALYSIS**

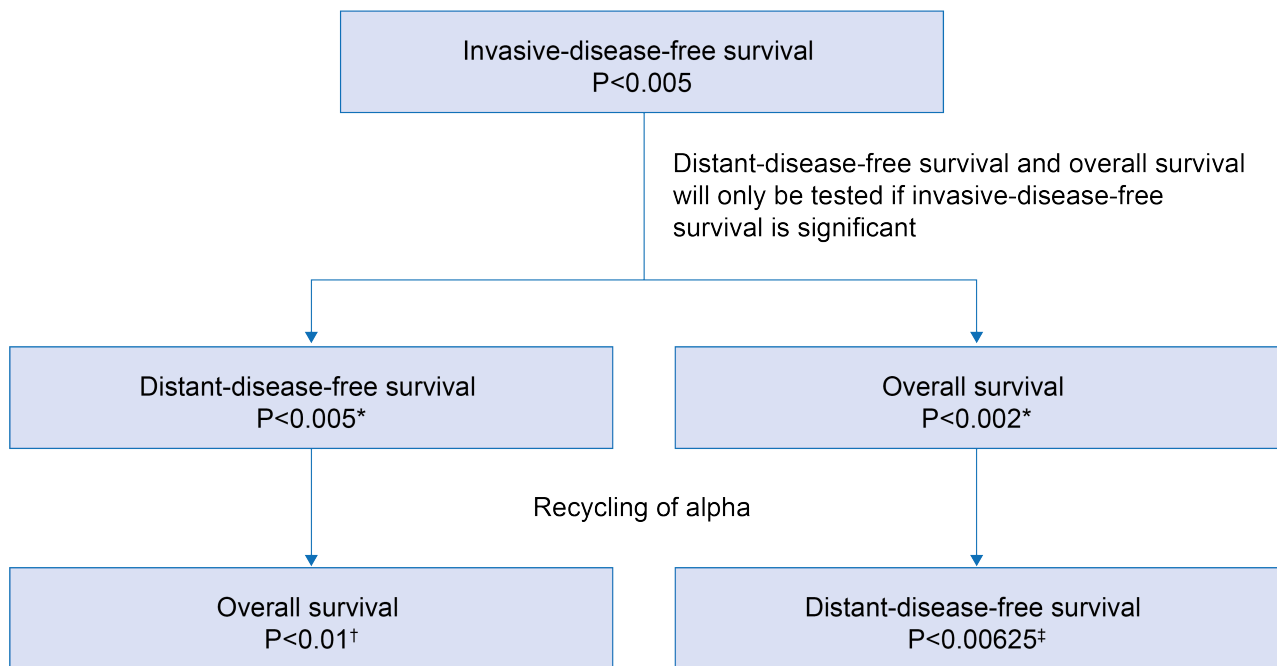

\* Distant-disease-free survival and overall survival will be tested only if invasive-disease-free survival is significant.

† If distant-disease-free survival is significant, overall survival will be tested at  $P < 0.01$ .

‡ If overall survival is significant, distant-disease-free survival will be tested at  $P < 0.00625$ .

**FIGURE S4: CONSORT DIAGRAM FOR THE OLYMPIA TRIAL - PATIENT POPULATION AND DISPOSITION**

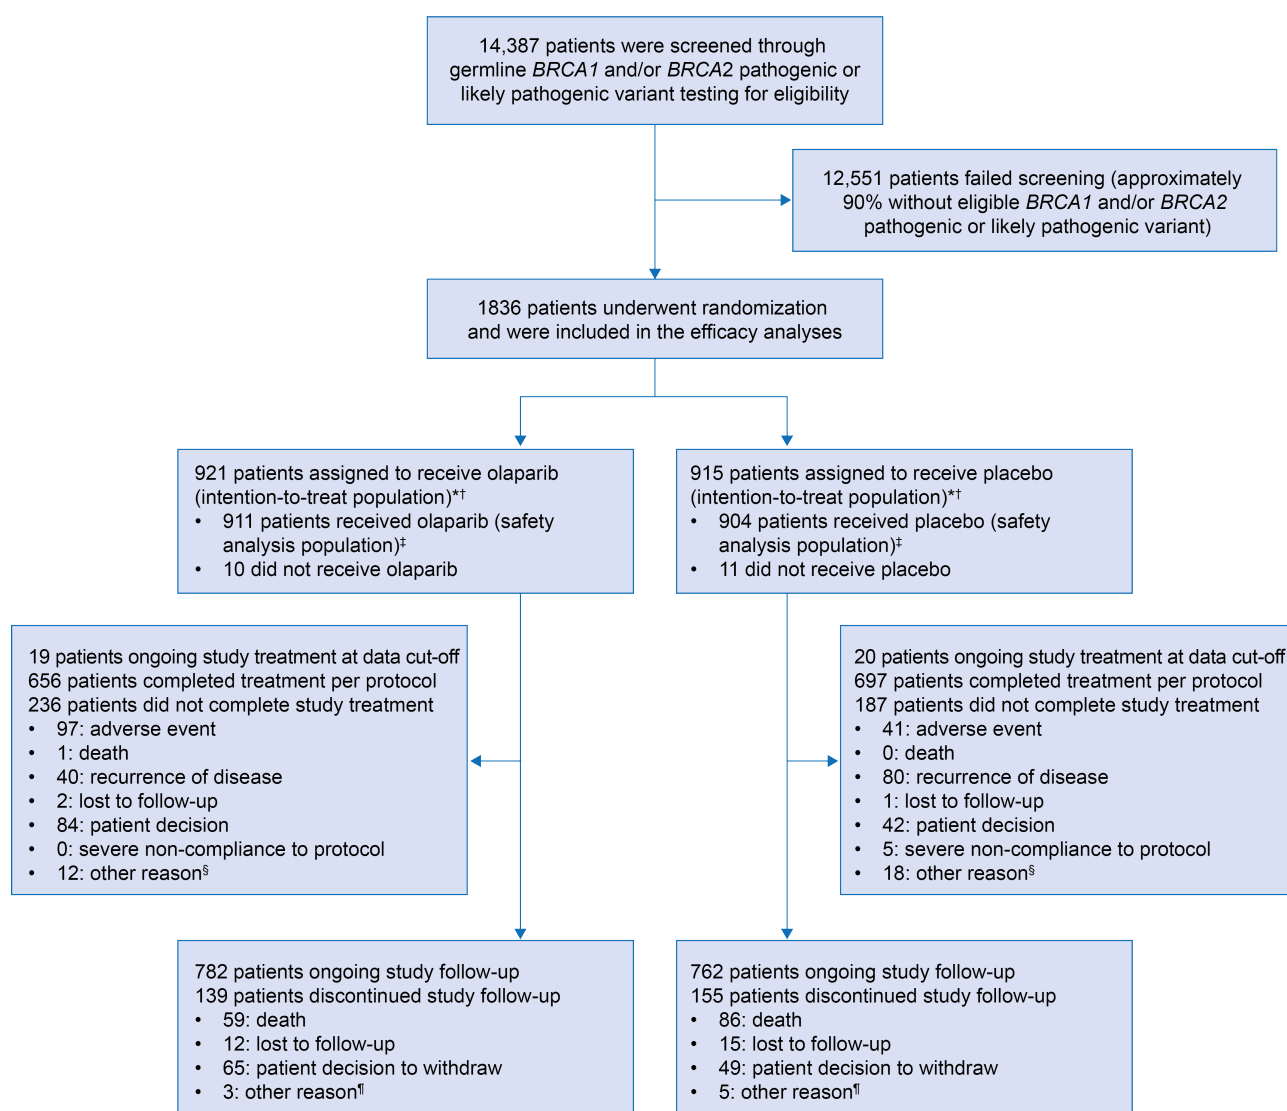

\*All randomized patients were included in the intention-to-treat population. The invasive disease free survival time was censored at 0.5 days for 14 patients because: a) they had had an event prior to randomization (olaparib, n = 2; placebo, n = 3); b) were identified as inadvertent randomisations (i.e. patient was randomised and the site later realised that they should not have been randomised, they have had no follow-up nor did they receive treatment) (olaparib, n = 1; placebo, n = 2); or c) have withdrawn consent, received no treatment, and will not be providing any follow-up data (olaparib, n = 2; placebo, n = 4).

---

† The first 900 patients randomized were included in the mature cohort evaluated by the Independent Data Monitoring Committee at the time of the prospectively planned interim analysis (olaparib, n = 449; placebo, n = 451).

‡ 21 patients who did not receive any study treatment were not included in the safety populations (olaparib, n=10; placebo, n=11).

§ Other reasons for discontinuation of treatment include: For olaparib: site error (n=8); surgery (n=2); Investigator's decision (n=1); Patient has lost insurance and could no longer come in for the study treatment (n=1); Patient was waiting to initiate IP (never started) and then was diagnosed with second primary (n=1). For placebo: site error (n=14); surgery (n=2); Treating investigator's decision (n=1); Patient had a chronic infection that did not resolve for months following her registration to study (n=1).

¶ Other reasons for discontinuation of study follow-up include; For olaparib: Investigator and sponsor decision (n=1); Randomized by mistake while waiting for radiotherapy treatment (n=1); Recurrence prior to randomization (n=1). For placebo: Incorrect randomization (unmet inclusion criteria 3b) (n=1); MD and patient decision to come off study (n=1); Non-compliance to protocol, patient is RAD51C and BRCA negative (n=1); Patient was randomized by mistake, in study physician's opinion patient was not eligible as ER+ and node negative (n=1); physician decision to withdraw patient (n=1).

### FIGURE S5: EORTC QLQ-C30 GHQ SCORE

The Patient Reported Outcomes (PRO) sub-study will be reported separately. In order to provide some quality of life data for this report of the primary outcome, we have analyzed the 2-item General Health Status/Quality of Life (GHQ) scale of the EORTC QLQ-C30 questionnaire. The PRO data analysis plan stratifies the study sample and considers separate analyses for those who received neoadjuvant or adjuvant chemotherapy prior to trial randomization. Here we show plots of mean EORTC QLQ-C-30 GHQ score by treatment assignment for patients who received neoadjuvant therapy and adjuvant chemotherapy. These indicate that GHQ did not decline during the 12 months of treatment with either olaparib or placebo and improved slightly in both groups between 12 and 24 months. A clinically meaningful difference in GHQ would be greater than 10 points, and the difference between the treatment arms is clinically insignificant.

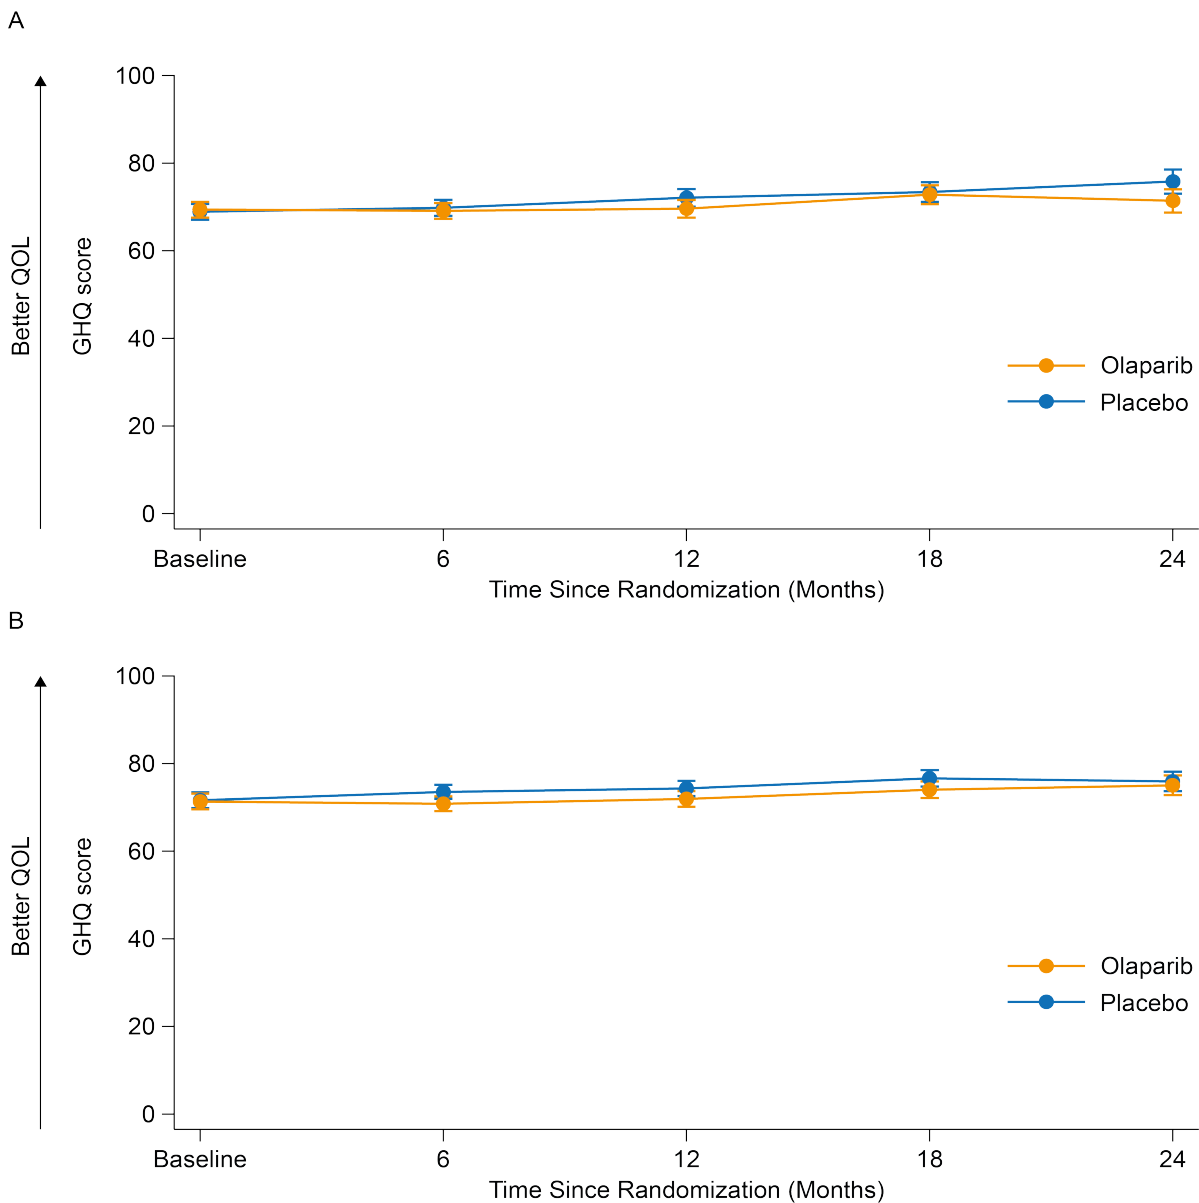

---

Legend: Mean response of EORTC QLQ-C30 GHQ score over time by treatment group. Panel A: patients who have completed neoadjuvant chemotherapy. Panel B: patients who have completed adjuvant chemotherapy. GHQ score ranges from 0 to 100, higher score indicates better QOL. Adjusted least-square mean responses and 95% CI for time points other than baseline are obtained from mixed model for repeated measures analysis of the GHQ score. The model includes treatment, time and treatment by time interaction, corresponding baseline score, and the baseline score by time interaction. Mean and 95% CI at baseline are based on the raw data.



**FIGURE S6: KM PLOTS FOR IDFS IN THE MATURE COHORT**

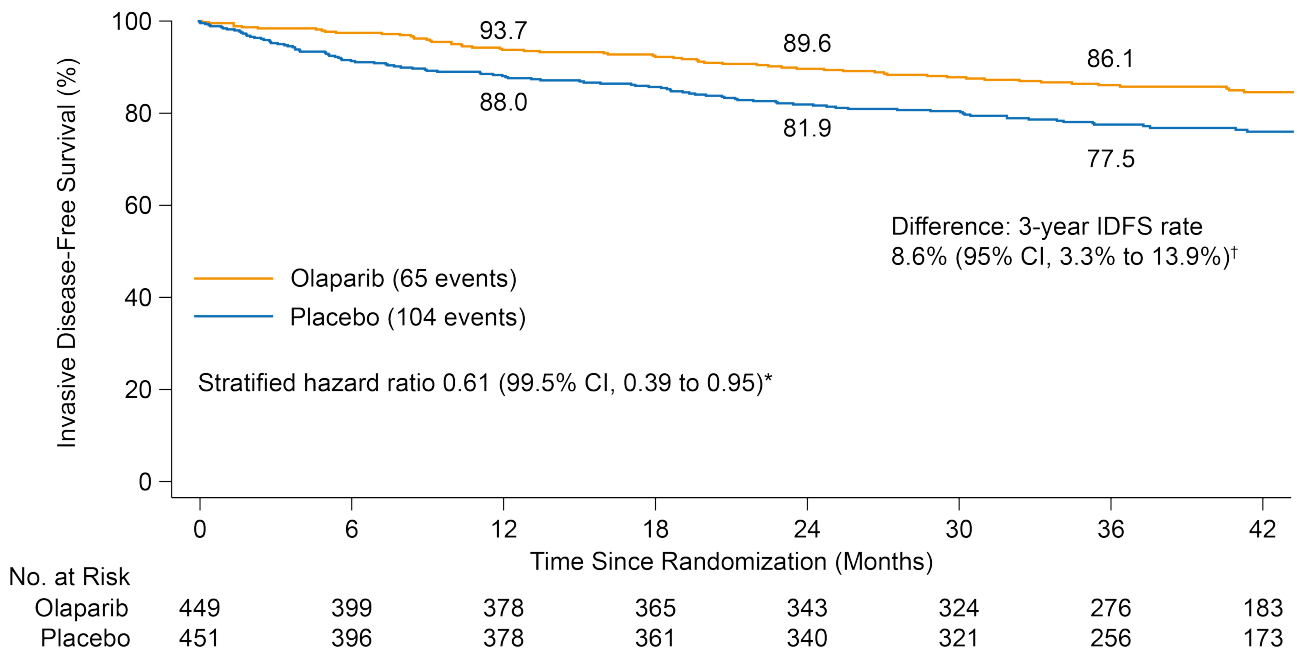

CI denotes confidence interval.

\* Stratified Cox proportional hazards model.

† Kaplan–Meier estimates.

## 5. SUPPLEMENTARY TABLES

**TABLE S1: PATIENTS RANDOMIZED IN OLYMPIA, BY COUNTRY**

| Country                                                    | Olaparib<br>(N = 921)      |        | Placebo<br>(N = 915) |        | Total<br>(N = 1836) |        |
|------------------------------------------------------------|----------------------------|--------|----------------------|--------|---------------------|--------|
|                                                            | <i>no. of patients (%)</i> |        |                      |        |                     |        |
| Argentina                                                  | 16                         | (1.7)  | 12                   | (1.3)  | 28                  | (1.5)  |
| Australia                                                  | 30                         | (3.3)  | 30                   | (3.3)  | 60                  | (3.3)  |
| Austria                                                    | 28                         | (3.0)  | 25                   | (2.7)  | 53                  | (2.9)  |
| Belgium                                                    | 12                         | (1.3)  | 26                   | (2.8)  | 38                  | (2.1)  |
| Canada                                                     | 11                         | (1.2)  | 23                   | (2.5)  | 34                  | (1.9)  |
| China                                                      | 117                        | (12.7) | 130                  | (14.2) | 247                 | (13.5) |
| France                                                     | 77                         | (8.4)  | 65                   | (7.1)  | 142                 | (7.7)  |
| Germany                                                    | 106                        | (11.5) | 92                   | (10.1) | 198                 | (10.8) |
| Hungary                                                    | 8                          | (0.9)  | 9                    | (1.0)  | 17                  | (0.9)  |
| Iceland                                                    | 5                          | (0.5)  | 1                    | (0.1)  | 6                   | (0.3)  |
| Israel                                                     | 30                         | (3.3)  | 35                   | (3.8)  | 65                  | (3.5)  |
| Italy                                                      | 30                         | (3.3)  | 27                   | (3.0)  | 57                  | (3.1)  |
| Japan                                                      | 64                         | (6.9)  | 76                   | (8.3)  | 140                 | (7.6)  |
| Korea (Republic of)                                        | 53                         | (5.8)  | 44                   | (4.8)  | 97                  | (5.3)  |
| Netherlands                                                | 11                         | (1.2)  | 18                   | (2.0)  | 29                  | (1.6)  |
| Poland                                                     | 50                         | (5.4)  | 59                   | (6.4)  | 109                 | (5.9)  |
| Portugal                                                   | 7                          | (0.8)  | 6                    | (0.7)  | 13                  | (0.7)  |
| Spain                                                      | 63                         | (6.8)  | 46                   | (5.0)  | 109                 | (5.9)  |
| Sweden                                                     | 20                         | (2.2)  | 15                   | (1.6)  | 35                  | (1.9)  |
| Switzerland                                                | 4                          | (0.4)  | 17                   | (1.9)  | 21                  | (1.1)  |
| Taiwan                                                     | 8                          | (0.9)  | 4                    | (0.4)  | 12                  | (0.7)  |
| United Kingdom of<br>Great Britain and<br>Northern Ireland | 60                         | (6.5)  | 46                   | (5.0)  | 106                 | (5.8)  |
| United States of<br>America                                | 111                        | (12.1) | 109                  | (11.9) | 220                 | (12.0) |

**TABLE S2A: BRCA1/2 VARIANT STATUS ANALYSED LOCALLY AND/OR CENTRALLY AT MYRIAD GENETICS [1]**

|                                                          | <b>Olaparib 300 mg bd<br/>(N=921)</b> | <b>Placebo<br/>(N=915)</b><br><i>no. of patients (%)</i> | <b>Overall<br/>(N=1836)</b> |
|----------------------------------------------------------|---------------------------------------|----------------------------------------------------------|-----------------------------|
| <b>Local germline BRCA1 or BRCA2 status [2]</b>          |                                       |                                                          |                             |
| gBRCA-P/LP variant                                       | 679 (73.7)                            | 680 (74.3)                                               | 1359 (74.0)                 |
| Variant of Uncertain Significance (VUS)                  | 1 (0.1)                               | 1 (0.1)                                                  | 2 (0.1)                     |
| No variant                                               | 0 (0.0)                               | 0 (0.0)                                                  | 0 (0.0)                     |
| No local result available                                | 241 (26.2)                            | 234 (25.6)                                               | 475 (25.9)                  |
| <b>BRCA1</b>                                             |                                       |                                                          |                             |
| gBRCA-P/LP variant                                       | 490 (53.2)                            | 508 (55.5)                                               | 998 (54.4)                  |
| Variant of Uncertain Significance (VUS)                  | 0 (0.0)                               | 1 (0.1)                                                  | 1 (0.1)                     |
| <b>BRCA2</b>                                             |                                       |                                                          |                             |
| gBRCA-P/LP variant                                       | 188 (20.4)                            | 168 (18.4)                                               | 356 (19.4)                  |
| Variant of Uncertain Significance (VUS)                  | 1 (0.1)                               | 0 (0.0)                                                  | 1 (0.1)                     |
| <b>BRCA1 &amp; BRCA2</b>                                 |                                       |                                                          |                             |
| gBRCA1-P/LP variant + gBRCA2-P/LP variant                | 1 (0.1)                               | 4 (0.4)                                                  | 5 (0.3)                     |
| <b>Central Myriad germline BRCA1 or BRCA2 status [3]</b> |                                       |                                                          |                             |
| gBRCA-D/SD-variant                                       | 777 (84.4)                            | 762 (83.3)                                               | 1539 (83.8)                 |
| Variant of Uncertain Significance (VUS)                  | 12 (1.3)                              | 8 (0.9)                                                  | 20 (1.1)                    |
| No variant                                               | 1 (0.1)                               | 4 (0.4)                                                  | 5 (0.3)                     |
| No central Myriad result available [4]                   | 131 (14.2)                            | 141 (15.4)                                               | 272 (14.8)                  |
| <b>BRCA1</b>                                             |                                       |                                                          |                             |
| gBRCA1-D/SD-variant                                      | 552 (59.9)                            | 553 (60.4)                                               | 1105 (60.2)                 |
| Variant of Uncertain Significance (VUS)                  | 6 (0.7)                               | 5 (0.5)                                                  | 11 (0.6)                    |
| <b>BRCA2</b>                                             |                                       |                                                          |                             |
| gBRCA2-D/SD-variant                                      | 224 (24.3)                            | 206 (22.5)                                               | 430 (23.4)                  |
| Variant of Uncertain Significance (VUS)                  | 6 (0.7)                               | 3 (0.3)                                                  | 9 (0.5)                     |
| <b>BRCA1 &amp; BRCA2</b>                                 |                                       |                                                          |                             |
| gBRCA1-D/SD-variant + gBRCA2-D/SD-variant                | 1 (0.1)                               | 3 (0.3)                                                  | 4 (0.2)                     |

[1] Local results include BGI Genomics results for China. Central testing was done by Myriad. OlympiA eligibility required either local results considered Pathogenic (P)/ Likely Pathogenic (LP) variants, as now reported by convention in cancer genetics, or Myriad central laboratory results reported as Deleterious (D)/ Suspected Deleterious (SD) for the same variant status.

---

[2] Local BRCA results are available only for patients for whose germline *BRCA1* or *BRCA2* variant status was known prior to study entry. Central Myriad results are not available for 247 patients enrolled from China. For countries other than China, central Myriad results are available for 1564 of the 1589 patients (98.4%) (see Supplementary Appendix Figure S2).

[3] Result of confirmatory test carried out centrally by Myriad.

[4] Includes 246 patients randomized in China (olaparib, n=117, placebo, n=129) whose local result from BGI Genomics in China confirmed gBRCA-P/LP-variant that meets study eligibility criteria and 1 patient screened in China with a variant of uncertain significance in the placebo arm. Also includes 25 patients from other countries (olaparib, n=14, placebo, n=11) tested locally with eligible gBRCA1- or gBRCA2-P/LP-variants for whom central Myriad results are not available, 2 of whom (olaparib, n=1; placebo, n=1) have neither local nor central Myriad P/LP variant.

**TABLE S2B: P/LP BRCA1/2 VARIANTS FOR >1 PATIENT [1]**

| <b>Gene Name</b> | <b>Variant listing</b>                                                                                                                                                                                                                                                                                                                                                                                                                                                                                                                                                                                                                                                                                                                                                                                                                                                                                                                                                                                                                                                                                                                                                                                                                                                                                                                                                                                                                                                                                                                                                                                                                                                                                                                                                                                                                                                                                                                                         | <b>No. patients with variant</b> |
|------------------|----------------------------------------------------------------------------------------------------------------------------------------------------------------------------------------------------------------------------------------------------------------------------------------------------------------------------------------------------------------------------------------------------------------------------------------------------------------------------------------------------------------------------------------------------------------------------------------------------------------------------------------------------------------------------------------------------------------------------------------------------------------------------------------------------------------------------------------------------------------------------------------------------------------------------------------------------------------------------------------------------------------------------------------------------------------------------------------------------------------------------------------------------------------------------------------------------------------------------------------------------------------------------------------------------------------------------------------------------------------------------------------------------------------------------------------------------------------------------------------------------------------------------------------------------------------------------------------------------------------------------------------------------------------------------------------------------------------------------------------------------------------------------------------------------------------------------------------------------------------------------------------------------------------------------------------------------------------|----------------------------------|
| <i>BRCA1</i>     | c.5266dupC (p.Gln1756Profs*74)                                                                                                                                                                                                                                                                                                                                                                                                                                                                                                                                                                                                                                                                                                                                                                                                                                                                                                                                                                                                                                                                                                                                                                                                                                                                                                                                                                                                                                                                                                                                                                                                                                                                                                                                                                                                                                                                                                                                 | N = 134                          |
| <i>BRCA1</i>     | c.68_69del (p.Glu23Valfs*17)                                                                                                                                                                                                                                                                                                                                                                                                                                                                                                                                                                                                                                                                                                                                                                                                                                                                                                                                                                                                                                                                                                                                                                                                                                                                                                                                                                                                                                                                                                                                                                                                                                                                                                                                                                                                                                                                                                                                   | N = 72                           |
| <i>BRCA1</i>     | c.181T>G (p.Cys61Gly)                                                                                                                                                                                                                                                                                                                                                                                                                                                                                                                                                                                                                                                                                                                                                                                                                                                                                                                                                                                                                                                                                                                                                                                                                                                                                                                                                                                                                                                                                                                                                                                                                                                                                                                                                                                                                                                                                                                                          | N = 44                           |
| <i>BRCA1</i>     | c.188T>A (p.Leu63*)                                                                                                                                                                                                                                                                                                                                                                                                                                                                                                                                                                                                                                                                                                                                                                                                                                                                                                                                                                                                                                                                                                                                                                                                                                                                                                                                                                                                                                                                                                                                                                                                                                                                                                                                                                                                                                                                                                                                            | N = 29                           |
| <i>BRCA1</i>     | c.5470_5477DEL                                                                                                                                                                                                                                                                                                                                                                                                                                                                                                                                                                                                                                                                                                                                                                                                                                                                                                                                                                                                                                                                                                                                                                                                                                                                                                                                                                                                                                                                                                                                                                                                                                                                                                                                                                                                                                                                                                                                                 | N = 24                           |
| <i>BRCA1</i>     | c.1687C>T (p.Gln563*); c.3700_3704del (p.Val1234Glnfs*8); c.4065_4068del (p.Asn1355Lysfs*10); c.2800C>T (p.Gln934*); c.4327C>T (p.Arg1443*); c.211A>G (p.Arg71Gly); c.5333-36_5406+400del; c.5251C>T (p.Arg1751*); c.3756_3759del (p.Ser1253Argfs*10); c.3607C>T (p.Arg1203*)                                                                                                                                                                                                                                                                                                                                                                                                                                                                                                                                                                                                                                                                                                                                                                                                                                                                                                                                                                                                                                                                                                                                                                                                                                                                                                                                                                                                                                                                                                                                                                                                                                                                                  | N = 10 - 19<br>(total = 121)     |
| <i>BRCA2</i>     | c.5946del (p.Ser1982Argfs*22); c.2808_2811del (p.Ala938Profs*21); c.6275_6276del (p.Leu2092Profs*7); c.7480C>T (p.Arg2494*)                                                                                                                                                                                                                                                                                                                                                                                                                                                                                                                                                                                                                                                                                                                                                                                                                                                                                                                                                                                                                                                                                                                                                                                                                                                                                                                                                                                                                                                                                                                                                                                                                                                                                                                                                                                                                                    | N = 10 - 19<br>(total = 56)      |
| <i>BRCA1</i>     | c.3481_3491del (p.Glu1161Phefs*3); c.4186-1787_4358-1668dup; c.2722G>T (p.Glu908*); c.5095C>T (p.Arg1699Trp); c.3485del (p.Asp1162Valfs*48); c.5123C>A (p.Ala1708Glu); c.2338C>T (p.Gln780*); c.66dupA (p.Glu23Argfs*18); c.1961del (p.Lys654Serfs*47); c.2685_2686del (p.Pro897Lysfs*5); c.3048_3052dup (p.Asn1018Metfs*8); c.4035del (p.Glu1346Lysfs*20); c.5030_5033del (p.Thr1677Ilefs*2); c.798_799del (p.Ser267Lysfs*19); c.815_824dup (p.Thr276Alafs*14); C.5521DEL; C.981_982DEL; c.5503C>T (p.Arg1835*); c.5445G>A (p.Trp1815*); c.390C>A (p.Tyr130*); c.4689C>G (p.Tyr1563*); c.3018_3021del (p.His1006Glnfs*17); c.5496_5506delinsA (p.Val1833Serfs*7); c.470_471del (p.Ser157*); c.843_846del (p.Ser282Tyrfs*15); c.(134+1_135-1)_(441+1_442-1)del; c.427G>T (p.Glu143*); c.5080G>T (p.Glu1694*); c.212+3A>G; c.5324T>G (p.Met1775Arg); c.4065_4068DEL; c.5444G>A (p.Trp1815*); c.1016dupA (p.Val340Glyfs*6); c.1504_1508del (p.Leu502Alafs*2); c.2269del (p.Val757Phefs*8); c.2681_2682del (p.Lys894Thrfs*8); c.3331_3334del (p.Gln1111Asnfs*5); c.3442del (p.Glu1148Argfs*7); c.3627dupA (p.Glu1210Argfs*9); c.5137del (p.Val1713*); c.191G>A (p.Cys64Tyr); c.(5193+1_5194-1)_(5277+1_5278-1)del; c.4675+1G>A; c.213-11T>G; c.213-12A>G; c.1A>G (p.Met1?); c.2572C>T; C.3770_3771DEL; c.4183C>T (p.Gln1395*); c.962G>A (p.Trp321*); c.4287C>A (p.Tyr1429*); c.930del (p.Gln310Hisfs*4); c.981_982del (p.Cys328*); c.19_47del (p.Arg7Cysfs*24); c.1510del (p.Arg504Valfs*28); c.1831del (p.Leu611*); c.1874_1877dupTAGT (p.Val627Serfs*4); c.2125_2126insA (p.Phe709Tyrfs*3); c.2433del (p.Lys812Argfs*3); c.2475del (p.Asp825Glufs*21); c.3228_3229del (p.Gly1077Alafs*8); c.3770_3771del (p.Glu1257Glyfs*9); c.4335_4338dupAGAA (p.Gln1447Argfs*16); c.4936del (p.Val1646Serfs*12); c.4964_4982del (p.Ser1655Tyrfs*16); c.5035_5039del (p.Leu1679Tyrfs*2); c.676del (p.Cys226Valfs*8); c.190T>C (p.Cys64Arg); c.(134+1_135-1)_(212+1_213-1)del; | N = 2 - 9<br>(total = 509)       |

c.(441+1\_442-1)\_(547+1\_548-1)del; c.(80+1\_81-1)\_(4986+1\_4987-1)del;  
c.4986+3G>C; c.4986+6T>C; c.5278-1G>C; c.5467+1G>A; c.2035A>T (p.Lys679\*);  
c.3442DEL; c.3607C>T; c.4801A>T; c.5074G>A; c.5332+1G>A; c.5333-2A>G;  
c.3841C>T (p.Gln1281\*); c.928C>T (p.Gln310\*); c.1082\_1092del (p.Ser361\*);  
c.1121\_1123delinsT (p.Thr374Ilefs\*3); c.1175\_1214del (p.Leu392Glnfs\*5);  
c.1380dupA (p.Phe461Ilefs\*19); c.1508del (p.Lys503Serfs\*29); c.70\_80del  
(p.Cys24Serfs\*13); c.1823\_1826del (p.Lys608Ilefs\*3); c.1892dupT  
(p.Ser632Lysfs\*4); c.2019del (p.Glu673Aspfs\*28); c.2110\_2111del  
(p.Asn704Cysfs\*7); c.2197\_2201del (p.Glu733Thrfs\*5); c.2214dupT (p.Lys739\*);  
c.117\_118del (p.Cys39\*); c.124del (p.Ile42Tyrfs\*8); c.2359dupG  
(p.Glu787Glyfs\*3); c.131\_132del (p.Cys44\*); c.2679\_2682del  
(p.Lys893Asnfs\*106); c.2940del (p.Pro981Hisfs\*19); c.3013del  
(p.Glu1005Asnfs\*19); c.3108dupT (p.Lys1037\*); c.3296del (p.Pro1099Leufs\*10);  
c.3549\_3550delinsT (p.Lys1183Asnfs\*27); c.3820dupG (p.Val1274Glyfs\*13);  
c.3839\_3843delinsAGGC (p.Ser1280\*); c.3901\_3902del (p.Ser1301\*);  
c.4041\_4042del (p.Gly1348Asnfs\*7); c.4165\_4166del (p.Ser1389\*); c.4243del  
(p.Glu1415Lysfs\*4); c.116G>A (p.Cys39Tyr); c.131G>T (p.Cys44Phe); c.5074G>A  
(p.Asp1692Asn); c.(80+1\_81-1)\_(134+1\_135-1)del; c.(4357+1\_4358-  
1)\_(4986+1\_4987-1)del; c.(441+1\_442-1)\_(4357+1\_4358-1)del; c.(547+1\_548-  
1)\_(4185+1\_4186-1)del; c.(5074+1\_5075-1)\_(5193+1\_5194-1)dup; c.3661G>T  
(p.Glu1221\*); c.3748G>T (p.Glu1250\*); c.5092G>T (p.Glu1698\*); c.4357+1G>C;  
c.4986+4A>T; c.5193+1G>A; c.213-2A>C; c.5339T>C (p.Leu1780Pro); c.1916T>A  
(p.Leu639\*); c.1608DEL; c.1660G>T; c.2012\_2013DUP; c.2110\_2111DEL;  
c.212G>A; c.2960DEL; c.3359\_3363DEL; c.3472G>T; c.4185+1G>A; c.4755DEL;  
c.5030\_5033DEL; c.5074+1G>A; c.5153-1G>T; c.5511G>C; c.66DUP;  
EXON13DELETION; EXON18-19DELETION; EXON18-20DELETION; EXON2-  
22DELETION; c.4186C>T (p.Gln1396\*); c.2309C>A (p.Ser770\*); c.5072C>A  
(p.Thr1691Lys); c.5154G>A (p.Trp1718\*); c.1266T>G (p.Tyr422\*); c.1965C>A  
(p.Tyr655\*)

BRCA2

c.5576\_5579del (p.Ile1859Lysfs\*3); c.6952C>T (p.Arg2318\*); c.9371A>T  
(p.Asn3124Ile); c.3264dupT (p.Gln1089Serfs\*10); c.6405\_6409del  
(p.Asn2135Lysfs\*3); c.9117G>A (p.Pro3039Pro); c.1813dupA (p.Ile605Asnfs\*11);  
c.3847\_3848del (p.Val1283Lysfs\*2); c.5722\_5723del (p.Leu1908Argfs\*2);  
c.9097dupA (p.Thr3033Asnfs\*11); c.9076C>T (p.Gln3026\*); c.5682C>G  
(p.Tyr1894\*); c.1310\_1313del (p.Lys437Ilefs\*22); c.658\_659del (p.Val220Ilefs\*4);  
c.7007G>A (p.Arg2336His); c.9382C>T (p.Arg3128\*); c.5645C>A (p.Ser1882\*);  
c.2701del (p.Ala902Leufs\*2); c.3545\_3546del (p.Phe1182\*);  
c.3975\_3978dupTGCT (p.Ala1327Cysfs\*4); c.5351dupA (p.Asn1784Lysfs\*3);  
c.8904del (p.Val2969Cysfs\*7); c.9403del (p.Leu3135Phefs\*28); c.771\_775del  
(p.Asn257Lysfs\*17); c.8167G>C (p.Asp2723His); c.5857G>T (p.Glu1953\*);  
c.9004G>A (p.Glu3002Lys); c.156\_157insAlu; c.2312T>G (p.Leu771\*); c.7558C>T  
(p.Arg2520\*); c.1599\_1600del (p.Glu534Serfs\*3); c.3170\_3174del  
(p.Lys1057Thrfs\*8); c.3195\_3198del (p.Asn1066Leufs\*10); c.3680\_3681del  
(p.Leu1227Glnfs\*5); c.3744\_3747del (p.Ser1248Argfs\*10); c.3860del  
(p.Asn1287Ilefs\*6); c.4449del (p.Asp1484Thrfs\*2); c.4936\_4939del  
(p.Glu1646Glnfs\*23); c.5073dupA (p.Trp1692Metfs\*3); c.5197\_5198del  
(p.Ser1733Argfs\*9); c.5213\_5216del (p.Thr1738Ilefs\*2); c.5217\_5223del  
(p.Tyr1739\*); c.5303\_5304del (p.Leu1768Argfs\*5); c.6024dupG  
(p.Gln2009Alafs\*9); c.6468\_6469del (p.Gln2157Ilefs\*18); c.6486\_6489del

N = 2 - 9  
(total = 203)

---

(p.Lys2162Asnfs\*5); c.469\_470del (p.Lys157Valfs\*25); c.7913\_7917del (p.Phe2638\*); c.8575del (p.Gln2859Lysfs\*4); c.662\_663del (p.Phe221Serfs\*3); c.9026\_9030del (p.Tyr3009Serfs\*7); c.156\_157insAlu; c.(7007+1\_7008-1)\_(7805+1\_7806-1)del; c.8629G>T (p.Glu2877\*); c.7806-2A>G; c.8487+1G>A; NM\_000059.3(BRCA2):C.3109C>T; c.3860DEL; c.5164\_5165DEL; c.6591\_6592DEL; c.7007G>T; c.9401DEL; c.3883C>T (p.Gln1295\*); c.8002A>T (p.Arg2668\*); c.9154C>T (p.Arg3052Trp); c.4965C>G (p.Tyr1655\*)

---

[1] Variants are listed for patients with a P/LP variant, either by central Myriad result, BGI, or by other local test for those with no central Myriad P/LP variant. Variants are only presented if they were seen in more than one patient. There are 2 patients with P/LP variants in both *BRCA1* and *BRCA2* genes listed in Table S2B.

**TABLE S3: DISCORDANT LOCAL *BRCA1/2* STATUS VS CENTRAL MYRIAD *BRCA1/2* STATUS FOR 22 (2.0%) PATIENTS AMONG THE 1090 PATIENTS WITH BOTH LOCAL AND CENTRAL MYRIAD RESULTS AVAILABLE [1]**

|                            | Local germline <i>BRCA1</i> or <i>BRCA2</i> status | <i>gBRCA</i> D/SD variant | Central Myriad germline <i>BRCA1</i> or <i>BRCA2</i> status |            |
|----------------------------|----------------------------------------------------|---------------------------|-------------------------------------------------------------|------------|
|                            |                                                    |                           | <i>no. of patients (%)</i>                                  |            |
| Overall                    |                                                    |                           | Variant of Uncertain Significance (VUS)                     | No variant |
| Olaparib 300 mg bd (N=550) | gBRCA-P/LP variant                                 | N/A                       | 10 (1.8)                                                    | 1 (0.2)    |
|                            | Variant of Uncertain Significance (VUS)            | 1 (0.2)                   | N/A                                                         | 0 (0.0)    |
|                            | No variant                                         | 0 (0.0)                   | 0 (0.0)                                                     | N/A        |
| Placebo (N=540)            | gBRCA-P/LP variant                                 | N/A                       | 7 (1.3)                                                     | 3 (0.6)    |
|                            | Variant of Uncertain Significance (VUS)            | 0 (0.0)                   | 0 (0.0)                                                     | N/A        |
|                            | No variant                                         | 0 (0.0)                   | N/A                                                         | 0 (0.0)    |
| Total (N=1090)             | gBRCA-P/LP variant                                 | N/A                       | 17 (1.6)                                                    | 4 (0.4)    |
|                            | Variant of Uncertain Significance (VUS)            | 1 (0.1)                   | N/A                                                         | 0 (0.0)    |
|                            | No variant                                         | 0 (0.0)                   | 0 (0.0)                                                     | N/A        |

[1] Local results include BGI Genomics results for China; central testing was done by Myriad. Percentages presented are based on those for whom both local results and central Myriad results are available. (See Figure S2 in this Supplementary Appendix)



**TABLE S4: CENTRAL RECEPTOR STATUS EXCLUDING CHINESE PATIENTS**

|                                                | <b>Olaparib 300 mg bd<br/>(N=921)</b> | <b>Placebo<br/>(N=915)</b><br><i>no. of patients (%)</i> | <b>Overall<br/>(N=1836)</b> |
|------------------------------------------------|---------------------------------------|----------------------------------------------------------|-----------------------------|
| <b>Patients with central pathology results</b> | 781                                   | 767                                                      | 1548                        |
| <b>HER2 IHC results</b>                        |                                       |                                                          |                             |
| 0                                              | 661 (84.6)                            | 652 (85.0)                                               | 1313 (84.8)                 |
| 1+                                             | 64 (8.2)                              | 57 (7.4)                                                 | 121 (7.8)                   |
| 2+                                             | 16 (2.0)                              | 12 (1.6)                                                 | 28 (1.8)                    |
| 3+                                             | 0 (0.0)                               | 2 (0.3)                                                  | 2 (0.1)                     |
| Not interpretable                              | 0 (0.0)                               | 0 (0.0)                                                  | 0 (0.0)                     |
| Missing                                        | 40 (5.1)                              | 44 (5.7)                                                 | 84 (5.4)                    |
| <b>HER2 ISH results [1]</b>                    |                                       |                                                          |                             |
| Amplified                                      | 1 (0.1)                               | 3 (0.4)                                                  | 4 (0.3)                     |
| Equivocal                                      | 0 (0.0)                               | 0 (0.0)                                                  | 0 (0.0)                     |
| Not amplified                                  | 15 (1.9)                              | 11 (1.4)                                                 | 26 (1.7)                    |
| Not interpretable                              | 0 (0.0)                               | 0 (0.0)                                                  | 0 (0.0)                     |
| Missing                                        | 40 (5.1)                              | 44 (5.7)                                                 | 84 (5.4)                    |
| <b>Hormone Receptor status</b>                 |                                       |                                                          |                             |
| Positive                                       | 169 (21.6)                            | 177 (23.1)                                               | 346 (22.4)                  |
| Negative                                       | 563 (72.1)                            | 543 (70.8)                                               | 1106 (71.4)                 |
| Missing                                        | 49 (6.3)                              | 47 (6.1)                                                 | 96 (6.2)                    |
| <b>ER status</b>                               |                                       |                                                          |                             |
| Positive                                       | 149 (19.1)                            | 156 (20.3)                                               | 305 (19.7)                  |
| Negative                                       | 591 (75.7)                            | 571 (74.4)                                               | 1162 (75.1)                 |
| Missing                                        | 41 (5.2)                              | 40 (5.2)                                                 | 81 (5.2)                    |
| <b>PgR status</b>                              |                                       |                                                          |                             |
| Positive                                       | 118 (15.1)                            | 115 (15.0)                                               | 233 (15.1)                  |
| Negative                                       | 616 (78.9)                            | 604 (78.7)                                               | 1220 (78.8)                 |
| Missing                                        | 47 (6.0)                              | 48 (6.3)                                                 | 95 (6.1)                    |

Percentages based on those with central pathology results. Central pathology review was performed at the European Institute of Oncology (IEO) in Milan, Italy.

HR+ is defined as ER positive and/or PgR positive, where positive is defined as  $\geq 1\%$  of cells stained positive.

Missing includes status 'not done', 'unknown' or 'missing'.

[1] Only reported for those that are not IHC 0 or 1+

**TABLE S5: LOCAL VS CENTRAL LABORATORY RESULTS: HORMONE RECEPTOR STATUS**

|                               | Local Status | Central status[1] |                                     |             |
|-------------------------------|--------------|-------------------|-------------------------------------|-------------|
|                               |              | HR(+)             | HR(-)<br><i>no. of patients (%)</i> | Missing [2] |
| Olaparib 300 mg bd<br>(N=921) | HR(+)        | 121 (13.1)        | <b>25 (2.7)</b>                     | 22 (2.4)    |
|                               | HR(-)        | <b>48 (5.2)</b>   | 538 (58.4)                          | 167 (18.1)  |
| Placebo (N=915)               | HR(+)        | 119 (13.0)        | <b>16 (1.7)</b>                     | 23 (2.5)    |
|                               | HR(-)        | <b>58 (6.3)</b>   | 527 (57.6)                          | 172 (18.8)  |
| Overall (N=1836)              | HR(+)        | 240 (13.1)        | <b>41 (2.2)</b>                     | 45 (2.5)    |
|                               | HR(-)        | <b>106 (5.8)</b>  | 1065 (58.0)                         | 339 (18.5)  |

HR+ is defined as ER positive ( $\geq 1\%$ ) and/or PgR positive ( $\geq 1\%$ ).

[1] Central laboratory review was not possible for patients recruited in China. Central pathology review was performed at the European Institute of Oncology (IEO) in Milan, Italy.

[2] Missing includes HR status 'unknown' or 'missing', as well as all patients from China.

Of the 1452 patients that have both a central and a local hormone receptor status, 147 (10%) have discordant results.

**TABLE S6: DEMOGRAPHIC AND BASELINE DISEASE CHARACTERISTICS OF THE PATIENTS**

| <b>Characteristic</b>                                                                      | <b>Olaparib Group<br/>(N=921)</b> |         | <b>Placebo Group<br/>(N=915)</b> |         | <b>Overall<br/>(N = 1836)</b> |         |
|--------------------------------------------------------------------------------------------|-----------------------------------|---------|----------------------------------|---------|-------------------------------|---------|
| Age - median (IQR)                                                                         | 42                                | (36-49) | 43                               | (36-50) | 43                            | (36-50) |
| Female - no. of patients (%)                                                               | 919                               | (99.8)  | 911                              | (99.6)  | 1830                          | (99.7)  |
| Male - no. of patients (%)                                                                 | 2                                 | (0.2)   | 4                                | (0.4)   | 6                             | (0.3)   |
| BRCA gene - no. of patients (%) [1]                                                        |                                   |         |                                  |         |                               |         |
| <i>BRCA1</i>                                                                               | 657                               | (71.3)  | 670                              | (73.2)  | 1327                          | (72.3)  |
| <i>BRCA2</i>                                                                               | 261                               | (28.3)  | 239                              | (26.1)  | 500                           | (27.2)  |
| <i>BRCA1 &amp; BRCA2</i>                                                                   | 2                                 | (0.2)   | 5                                | (0.5)   | 7                             | (0.4)   |
| Missing                                                                                    | 1                                 | (0.1)   | 1                                | (0.1)   | 2                             | (0.1)   |
| Local or central Myriad <i>BRCA1</i> or <i>BRCA2</i> germline testing result available [1] | 920                               | (99.9)  | 915                              | (100)   | 1835                          | (99.9)  |
| Local or central Myriad <i>BRCA1</i> or <i>BRCA2</i> P/LP variant [2]                      | 918                               | (99.7)  | 912                              | (99.7)  | 1830                          | (99.7)  |
| Local testing only [3]                                                                     | 130                               | (14.1)  | 141                              | (15.4)  | 271                           | (14.8)  |
| Central Myriad testing only                                                                | 240                               | (26.0)  | 234                              | (25.6)  | 474                           | (25.8)  |
| No local or central Myriad testing available                                               | 1                                 | (0.1)   | 0                                | (0.0)   | 1                             | (0.1)   |
| Local and central BRCA result [4]                                                          | 550                               | (59.7)  | 540                              | (59.0)  | 1090                          | (59.4)  |
| Local (+)/Central (+)                                                                      | 538/550                           | (97.8)  | 530/540                          | (98.1)  | 1068/1090                     | (98.0)  |
| Local (-)/Central (+)                                                                      | 1/550                             | (0.2)   | 0/540                            | (0.0)   | 1/1090                        | (0.1)   |
| Local (+)/central (-)                                                                      | 11/550                            | (2.0)   | 10/540                           | (1.9)   | 21/1090                       | (1.9)   |
| Race - no. of patients (%)                                                                 |                                   |         |                                  |         |                               |         |
| White                                                                                      | 626                               | (68.0)  | 599                              | (65.5)  | 1225                          | (66.7)  |
| Black/African-American                                                                     | 19                                | (2.1)   | 29                               | (3.2)   | 48                            | (2.6)   |
| Asian                                                                                      | 259                               | (28.1)  | 272                              | (29.7)  | 531                           | (28.9)  |
| Other                                                                                      | 17                                | (1.8)   | 15                               | (1.6)   | 32                            | (1.7)   |
| Ethnicity - no. of patients (%)                                                            |                                   |         |                                  |         |                               |         |
| Hispanic or Latino                                                                         | 34                                | (3.7)   | 24                               | (2.6)   | 58                            | (3.2)   |
| Not Hispanic or Latino                                                                     | 805                               | (87.4)  | 812                              | (88.7)  | 1617                          | (88.1)  |
| Not known, not recorded or refused                                                         | 82                                | (8.9)   | 79                               | (8.6)   | 161                           | (8.8)   |
| Jewish descent - no. of patients (%) [5]                                                   |                                   |         |                                  |         |                               |         |
| Yes, of Ashkenazi descent                                                                  | 41                                | (4.5)   | 36                               | (3.9)   | 77                            | (4.2)   |
| Not of Ashkenazi descent                                                                   | 880                               | (95.5)  | 876                              | (95.7)  | 1756                          | (95.6)  |
| Geographic region - no. of patients (%)                                                    |                                   |         |                                  |         |                               |         |
| North America                                                                              | 122                               | (13.2)  | 132                              | (14.4)  | 254                           | (13.8)  |
| South America                                                                              | 16                                | (1.7)   | 12                               | (1.3)   | 28                            | (1.5)   |
| Europe                                                                                     | 481                               | (52.2)  | 452                              | (49.4)  | 933                           | (50.8)  |
| Asia Pacific and South Africa                                                              | 302                               | (32.8)  | 319                              | (34.9)  | 621                           | (33.8)  |
| Prior Neo/Adjuvant chemotherapy - no. of patients (%)                                      |                                   |         |                                  |         |                               |         |

|                                                                                   |         |        |         |        |           |        |
|-----------------------------------------------------------------------------------|---------|--------|---------|--------|-----------|--------|
| Adjuvant                                                                          | 461     | (50.1) | 455     | (49.7) | 916       | (49.9) |
| Neoadjuvant                                                                       | 460     | (49.9) | 460     | (50.3) | 920       | (50.1) |
| Anthracycline and taxane regimen                                                  | 871     | (94.6) | 849     | (92.8) | 1720      | (93.7) |
| Anthracycline regimen (without taxane)                                            | 7       | (0.8)  | 13      | (1.4)  | 20        | (1.1)  |
| Taxane regimen (without anthracycline)                                            | 43      | (4.7)  | 52      | (5.7)  | 95        | (5.2)  |
| Regimen not reported                                                              | 0       | (0.0)  | 1       | (0.1)  | 1         | (0.1)  |
| Less than 6 cycles (neo)adjuvant chemotherapy                                     | 7       | (0.8)  | 15      | (1.6)  | 22        | (1.2)  |
| Neo/ Adjuvant platinum therapy - no. of patients (%)                              |         |        |         |        |           |        |
| No                                                                                | 674     | (73.2) | 676     | (73.9) | 1350      | (73.5) |
| Yes                                                                               | 247     | (26.8) | 239     | (26.1) | 486       | (26.5) |
| Concurrent hormone therapy (hormone receptor positive only) - no. of patients (%) | 146/168 | (86.9) | 142/157 | (90.4) | 288/325   | (88.6) |
| Grade - no. of patients (%) [6]                                                   |         |        |         |        |           |        |
| Gx: Cannot be assessed                                                            | 11/714  | (1.5)  | 7/720   | (1.0)  | 18/1434   | (1.3)  |
| G1: Well differentiated                                                           | 2/714   | (0.3)  | 3/720   | (0.4)  | 5/1434    | (0.3)  |
| G2: Moderately differentiated                                                     | 128/714 | (17.9) | 114/720 | (15.8) | 242/1434  | (16.9) |
| G3: Poorly differentiated/undifferentiated                                        | 562/714 | (78.7) | 582/720 | (80.8) | 1144/1434 | (79.8) |
| Not done                                                                          | 11/714  | (1.5)  | 14/720  | (1.9)  | 25/1434   | (1.7)  |
| Pathological AJCC stage (adjuvant chemotherapy only) - no. of patients (%)        |         |        |         |        |           |        |
| 0                                                                                 | 0/461   | (0.0)  | 0/455   | (0.0)  | 0/916     | (0.0)  |
| IA [7]                                                                            | 5/461   | (1.1)  | 2/455   | (0.4)  | 7/916     | (0.8)  |
| IB                                                                                | 15/461  | (3.3)  | 11/455  | (2.4)  | 26/916    | (2.8)  |
| IIA                                                                               | 264/461 | (57.3) | 250/455 | (54.9) | 514/916   | (56.1) |
| IIB                                                                               | 70/461  | (15.2) | 75/455  | (16.5) | 145/916   | (15.8) |
| IIIA                                                                              | 73/461  | (15.8) | 70/455  | (15.4) | 143/916   | (15.6) |
| IIIB                                                                              | 0/461   | (0.0)  | 2/455   | (0.4)  | 2/916     | (0.2)  |
| IIIC                                                                              | 28/461  | (6.1)  | 41/455  | (9.0)  | 69/916    | (7.5)  |
| NA [8]                                                                            | 6/461   | (1.3)  | 4/455   | (0.9)  | 10/916    | (1.1)  |
| CPS + EG score (neo adjuvant chemotherapy only)                                   |         |        |         |        |           |        |
| no. of patients (%)                                                               |         |        |         |        |           |        |
| CPS+EG score of 2, 3 or 4                                                         | 398/460 | (86.5) | 387/460 | (84.1) | 785/920   | (85.3) |
| CPS+EG score of 5 or 6                                                            | 22/460  | (4.8)  | 15/460  | (3.3)  | 37/920    | (4.0)  |
| HR+/HER2-                                                                         |         |        |         |        |           |        |
| CPS+EG score ≤2 [7]                                                               | 13/460  | (2.8)  | 6/460   | (1.3)  | 19/920    | (2.1)  |
| CPS+EG score of 3 or 4                                                            | 88/460  | (19.1) | 85/460  | (18.5) | 173/920   | (18.8) |
| CPS+EG score of 5 or 6                                                            | 3/460   | (0.7)  | 1/460   | (0.2)  | 4/920     | (0.4)  |

|                                                                                          |         |        |         |        |           |        |
|------------------------------------------------------------------------------------------|---------|--------|---------|--------|-----------|--------|
| Not recorded                                                                             | 0/460   | (0.0)  | 0/460   | (0.0)  | 0/920     | (0.0)  |
| Triple Negative Breast Cancer                                                            |         |        |         |        |           |        |
| CPS+EG score ≤2                                                                          | 151/460 | (32.8) | 144/460 | (31.3) | 295/920   | (32.1) |
| CPS+EG score of 3 or 4                                                                   | 179/460 | (38.9) | 197/460 | (42.8) | 376/920   | (40.9) |
| CPS+EG score of 5 or 6                                                                   | 19/460  | (4.1)  | 14/460  | (3.0)  | 33/920    | (3.6)  |
| Not recorded                                                                             | 7/460   | (1.5)  | 13/460  | (2.8)  | 20/920    | (2.2)  |
| Hormone receptor status - no. of patients (%) [9]                                        |         |        |         |        |           |        |
| Hormone receptor + / HER2- [10]                                                          | 168     | (18.2) | 157     | (17.2) | 325       | (17.7) |
| Triple Negative Breast Cancer [11]                                                       | 751     | (81.5) | 758     | (82.8) | 1509      | (82.2) |
| Menopausal status (females only) - no. of patients (%)                                   |         |        |         |        |           |        |
| Premenopausal                                                                            | 572/919 | (62.2) | 553/911 | (60.7) | 1125/1830 | (61.5) |
| Postmenopausal                                                                           | 347/919 | (37.8) | 358/911 | (39.3) | 705/1830  | (38.5) |
| Bilateral invasive breast cancer - no. of patients (%)                                   |         |        |         |        |           |        |
| No                                                                                       | 881     | (95.7) | 888     | (97.0) | 1769      | (96.4) |
| Yes                                                                                      | 40      | (4.3)  | 27      | (3.0)  | 67        | (3.6)  |
| Primary breast cancer surgery - no. of patients (%)                                      |         |        |         |        |           |        |
| Mastectomy                                                                               | 698     | (75.8) | 673     | (73.6) | 1371      | (74.7) |
| Conservative surgery only                                                                | 223     | (24.2) | 240     | (26.2) | 463       | (25.2) |
| Missing                                                                                  | 0       | (0.0)  | 2       | (0.2)  | 2         | (0.1)  |
| Local therapy for primary breast cancer - no. of patients (%)                            |         |        |         |        |           |        |
| Mastectomy plus radiation therapy                                                        | 426     | (46.3) | 410     | (44.8) | 836       | (45.5) |
| Mastectomy without radiation therapy                                                     | 272     | (29.5) | 263     | (28.7) | 535       | (29.1) |
| Conservative surgery plus radiation therapy                                              | 215     | (23.3) | 231     | (25.2) | 446       | (24.3) |
| Conservative surgery without radiation therapy                                           | 8       | (0.9)  | 9       | (1.0)  | 17        | (0.9)  |
| Missing                                                                                  | 0       | (0.0)  | 2       | (0.2)  | 2         | (0.1)  |
| Bilateral mastectomy prior to randomisation - no. of patients (%)                        | 332     | (36.0) | 317     | (34.6) | 649       | (35.3) |
| Bilateral mastectomy after randomisation - no. of patients (%)                           | 98      | (10.6) | 108     | (11.8) | 206       | (11.2) |
| Bilateral oophorectomy and/or salpingectomy prior to randomisation - no. of patients (%) | 185     | (20.1) | 166     | (18.1) | 351       | (19.1) |
| Bilateral oophorectomy and/or salpingectomy after randomisation - no. of patients (%)    | 375     | (40.7) | 386     | (42.2) | 761       | (41.4) |

---

[1] For a detailed description of local and central Myriad *BRCA1/2* testing in patients enrolled on OlympiA please see Figure S2 in this Supplementary Appendix.

Variant interpretation by Myriad Genetics (BRCAAnalysis) (n=1564) and BGI Genomics (n=247) is performed using multiple established databases (e.g., ClinVar, ClinGen, ENIGMA) and published and internal functional and clinical data, compliant with ACMG published guidelines. The 24 P/LP variants from local labs without central Myriad confirmation were confirmed by the OlympiA Genetics Advisory Committee using published databases as above. Discordant data are enumerated.

[2] There are 6 patients with an important protocol deviation reported for no documented gBRCA-P/LP-variant in *BRCA1* or *BRCA2* (olaparib, n= 3; placebo n = 3) including 5 patients entered (olaparib, n= 2; placebo n = 3) where either the local or central Myriad testing was done, but with no evidence of a gBRCA-P/LP-variant, and 1 patient in the olaparib group where no local or central Myriad result is available. (See Supplementary Appendix Figure S2).

[3] Includes 246 patients randomized in China (olaparib, n=117, placebo, n=129) whose local result from BGI Genomics in China confirmed gBRCA-P/LP-variant that meets study eligibility criteria and 1 patient screened in China with a variant of uncertain significance in the placebo arm all of whom have no central Myriad result available. Also includes 24 patients from other countries (olaparib, n=13, placebo, n=11) for whom central Myriad results are not available. (See Supplementary Appendix Figure S2).

[4] Patients eligible for the trial are those with a gBRCA-P/LP (D/SD)-variant defined by local testing or central Myriad testing. Patients randomised based on a local test result should also have central Myriad testing done. *BRCA1* and *BRCA2* testing was done by BGI Genomics in China, there are no Myriad results available for these or 25 other patients tested locally only (See Supplementary Appendix Figure S2).

[5] Not Ashkenazi Jewish can mean that the patient is either Jewish but not Ashkenazi Jewish, not Jewish or descent recorded as unknown.

[6] Includes only those patients receiving neoadjuvant chemotherapy for whom eCRF indicates histological grade was assessed on treatment naïve core biopsy and on all patients receiving adjuvant chemotherapy

[7] Reported as protocol deviations.

[8] These include 2 occult BC (placebo, n = 2), 6 pTx (olaparib, n = 4; placebo, n = 2) and 2 pNx (olaparib, n = 2).

[9] Defined by local test results.

[10] The original protocol activated in 2014 was developed for patients with HER2-negative disease but included only patients with TNBC following regulatory review. When hormone-receptor-positive recurrence risk and combination olaparib and endocrine combination safety rationale was accepted by regulators the protocol was amended in 2015 to include patients with high-risk hormone-receptor positive disease and increase the sample size to the current 1800 level (see Protocol History on [www.nejm.org](http://www.nejm.org)). The first patient with hormone-receptor positive disease was enrolled in December 2015.

---

[11] Triple negative breast cancer was defined in eligibility criteria as: ER and PgR negative defined as IHC nuclear staining <1%. AND HER2 negative (not eligible for anti-HER2 therapy) defined as: IHC 0, 1+ without ISH OR IHC 2+ and ISH non-amplified with ratio less than 2.0 and if reported, average HER2 copy number < 4 signals/cells OR ISH non-amplified with ratio less than 2.0 and if reported, average HER2 copy number < 4 signals/cells (without IHC)

Two patients are excluded from the summary of the TNBC subset because they do not have confirmed negative HER2 status.

**TABLE S7: TYPE OF FIRST IDFS EVENT [1]**

|                                                                      | Olaparib 300 mg bd<br>(N=921)<br><i>no. of patients (%)</i> | Placebo<br>(N=915) |
|----------------------------------------------------------------------|-------------------------------------------------------------|--------------------|
| <b>IDFS events</b>                                                   | <b>106 (11.5)</b>                                           | <b>178 (19.5)</b>  |
| <b>Distant</b>                                                       | <b>72 (7.8)</b>                                             | <b>120 (13.1)</b>  |
| <b>Distant CNS recurrence</b>                                        | <b>22 (2.4)</b>                                             | <b>36 (3.9)</b>    |
| Brain metastasis                                                     | 21 (2.3)                                                    | 36 (3.9)           |
| Meningitis carcinomatosa                                             | 1 (0.1)                                                     | 0 (0.0)            |
| <b>Distant excl. CNS recurrence</b>                                  | <b>50 (5.4)</b>                                             | <b>84 (9.2)</b>    |
| Bone                                                                 | 5 (0.5)                                                     | 14 (1.5)           |
| Lymph nodes (other than local or regional)                           | 5 (0.5)                                                     | 9 (1.0)            |
| Lung                                                                 | 16 (1.7)                                                    | 34 (3.7)           |
| Liver                                                                | 20 (2.2)                                                    | 23 (2.5)           |
| Pleural effusion                                                     | 3 (0.3)                                                     | 4 (0.4)            |
| Other                                                                | 1 (0.1)                                                     | 0 (0.0)            |
| <b>Regional (ipsilateral) recurrence</b>                             | <b>6 (0.7)</b>                                              | <b>14 (1.5)</b>    |
| Axillary lymph nodes                                                 | 6 (0.7)                                                     | 9 (1.0)            |
| Supraclavicular lymph nodes                                          | 0 (0.0)                                                     | 3 (0.3)            |
| Internal mammary lymph nodes                                         | 0 (0.0)                                                     | 1 (0.1)            |
| Skin or soft tissue within the regional area                         | 0 (0.0)                                                     | 1 (0.1)            |
| <b>Local (ipsilateral) recurrence</b>                                | <b>7 (0.8)</b>                                              | <b>11 (1.2)</b>    |
| Breast surgical scar                                                 | 1 (0.1)                                                     | 3 (0.3)            |
| Breast                                                               | 3 (0.3)                                                     | 4 (0.4)            |
| Anterior chest wall                                                  | 2 (0.2)                                                     | 2 (0.2)            |
| Skin or soft tissue within the local area                            | 1 (0.1)                                                     | 2 (0.2)            |
| <b>Contralateral invasive breast cancer</b>                          | <b>8 (0.9)</b>                                              | <b>12 (1.3)</b>    |
| <b>Second primary malignancies</b>                                   | <b>11 (1.2)</b>                                             | <b>21 (2.3)</b>    |
| Second primary invasive non-breast ovarian/fallopian tube malignancy | 2 (0.2)                                                     | 8 (0.9)            |
| Second primary invasive non-breast non-ovarian malignancies          | 9 (1.0)                                                     | 13 (1.4)           |
| <b>Deaths without a prior IDFS event [2]</b>                         | <b>2 (0.2)</b>                                              | <b>0 (0.0)</b>     |

[1] If two recurrence events are reported within 2 months of each other this is referred to as a simultaneous event and will be considered as a single event. In this situation the worst case will be taken as the event 'type' but the date of recurrence will be the earliest date of the two events. (reference Hudis et al, 2007)

[2] The 2 deaths without a prior IDFS event were a cardiac arrest and cause unknown.



---

**TABLE S8: ALL DEATHS**

|                        | <b>Olaparib 300 mg bd<br/>(N=921)</b> | <b>Placebo<br/>(N=915)</b> |
|------------------------|---------------------------------------|----------------------------|
|                        | <i>no. of patients (%)</i>            |                            |
| Total number of deaths | 59 (6.4)                              | 86 (9.4)                   |
| Primary cause of death |                                       |                            |
| Breast cancer          | 55 (93.2)                             | 82 (95.3)                  |
| Adverse event [1]      | 1 (1.7)                               | 3 (3.5)                    |
| Other [2]              | 3 (5.1)                               | 1 (1.2)                    |
| Missing                | 0 (0.0)                               | 0 (0.0)                    |

[1] Olaparib: Cardiac arrest (n = 1); Placebo: AML (n = 2), Ovarian cancer (n = 1)

[2] Olaparib: Pulmonary embolism (n = 1), Unknown (n= 1), Pneumonia (n = 1); Placebo: Unknown (n=1)

**TABLE S9: RESULTS OF SENSITIVITY ANALYSES**

|                                                                                           | <b>Olaparib</b> | <b>Placebo</b> |
|-------------------------------------------------------------------------------------------|-----------------|----------------|
| <b>Sensitivity analysis of IDFS in confirmed Myriad gBRCA D/SD patients (n= 1539) [1]</b> |                 |                |
| Number of patients                                                                        | <b>777</b>      | <b>762</b>     |
| Number of events (%)                                                                      | 89 (11.5)       | 163 (21.4)     |
| Estimate of hazard ratio                                                                  | 0.51            |                |
| 99.5% CI for hazard ratio                                                                 | (0.35 , 0.73)   |                |
| <b>Sensitivity analysis of DDFS in confirmed Myriad gBRCA D/SD patients (n= 1539) [1]</b> |                 |                |
| Number of patients                                                                        | <b>777</b>      | <b>762</b>     |
| Any distant recurrence of disease, second primary cancer, or death (%)                    | 74 (9.5)        | 138 (18.1)     |
| Estimate of hazard ratio                                                                  | 0.50            |                |
| 99.5% CI for hazard ratio                                                                 | (0.33 , 0.75)   |                |
| <b>Sensitivity analysis of OS in confirmed Myriad gBRCA D/SD patients (n= 1539) [1]</b>   |                 |                |
| Number of patients                                                                        | <b>777</b>      | <b>762</b>     |
| Number of deaths (%)                                                                      | 47 (6.0)        | 79 (10.4)      |
| Estimate of hazard ratio                                                                  | 0.58            |                |
| 99% CI for hazard ratio                                                                   | (0.35 , 0.92)   |                |
| Number of deaths deemed attributable to breast cancer                                     | 44 (5.7)        | 75 (9.8)       |
| <b>Central pathology review IDFS analysis (n = 1452) [2]</b>                              |                 |                |
| Number of patients                                                                        | 732             | 720            |
| Number of events (%)                                                                      | 86 (11.7)       | 151 (21.0)     |
| Estimate of IDFS hazard ratio                                                             | 0.54            |                |
| 99.5% CI for IDFS hazard ratio                                                            | (0.36 , 0.78)   |                |
| <b>Unadjusted IDFS analysis (n= 1836) [3]</b>                                             |                 |                |
| Number of patients                                                                        | 921             | 915            |
| Number of events (%)                                                                      | 106 (11.5)      | 178 (19.5)     |
| Estimate of IDFS hazard ratio                                                             | 0.58            |                |
| 99.5% CI for hazard ratio                                                                 | (0.41,0.82)     |                |
| <b>Restricted mean survival time (RMST) for IDFS (n = 1836) [3]</b>                       |                 |                |
| Number of patients                                                                        | 921             | 915            |
| RMST ratio (olaparib/placebo) [4]                                                         | 1.085           |                |
| 99.5% CI for RMST ratio                                                                   | (1.034,1.139)   |                |
| Chi-square: p-value                                                                       | < 0.0001        |                |
| <b>Proportionality test p-value for IDFS (n=1836)</b>                                     |                 |                |
| GT test: Identity transformation of time [5]                                              | 0.02            |                |
| GT test: Rank transformation of time [6]                                                  | 0.02            |                |

---

**Proportionality test p-value for DDFS (n=1836)**

|                                              |      |
|----------------------------------------------|------|
| GT test: Identity transformation of time [5] | 0.20 |
| GT test: Rank transformation of time [6]     | 0.10 |

**Proportionality test p-value for OS (n=1836)**

|                                              |      |
|----------------------------------------------|------|
| GT test: Identity transformation of time [5] | 0.79 |
| GT test: Rank transformation of time [6]     | 0.71 |

---

CI, confidence interval

[1] Patients with confirmed Myriad gBRCA-D/SD-variant, excludes 247 patients randomised in China who do not have central Myriad testing available + another 50 patients from other countries who do not have a central confirmed gBRCA-D/SD-variant result.

[2] Includes patients with both central and local hormone receptor results (see Table S5 in this Supplementary Appendix). Excludes 247 from China and 137 from non-Chinese sites. Central pathology review was performed at the European Institute of Oncology (IEO) in Milan, Italy.

[3] Includes entire intention to treat population.

[4] RMST ratio is the RMST for olaparib divided by the RMST for placebo. Numbers greater than 1.0 reflect an increase in the average months free from an IDFS event for olaparib versus placebo - ie. numbers greater than 1.0 favor olaparib. Olaparib significantly increases restricted mean survival time compared with placebo.

[5] Grambsch-Therneau test using untransformed time in the scaled Schoenfeld residual test.

[6] Grambsch-Therneau test using rank transformation of time in the scaled Schoenfeld residual.

**TABLE S10: INVASIVE DISEASE FREE SURVIVAL SUBGROUP ANALYSIS**

| <b>Subgroup</b>                                                    | <b>N<br/>Olaparib/Placebo</b> | <b>Events (%)<br/>Olaparib /Placebo</b> | <b>Hazard ratio<br/>&amp; 95% CI [1]</b> |
|--------------------------------------------------------------------|-------------------------------|-----------------------------------------|------------------------------------------|
| <b>Overall</b>                                                     | <b>921 / 915</b>              | <b>106 (11.5) / 178 (19.5)</b>          | <b>0.58 (0.46, 0.74)</b>                 |
| <b>Prior Chemo</b>                                                 |                               |                                         |                                          |
| Adjuvant                                                           | 461 / 455                     | 36 (7.8) / 61 (13.4)                    | 0.60 (0.39, 0.90)                        |
| Neoadjuvant                                                        | 460 / 460                     | 70 (15.2) / 117 (25.4)                  | 0.56 (0.41, 0.75)                        |
| <b>Prior Platinum</b>                                              |                               |                                         |                                          |
| Yes                                                                | 247 / 239                     | 34 (13.8) / 43 (18.0)                   | 0.77 (0.49, 1.21)                        |
| No                                                                 | 674 / 676                     | 72 (10.7) / 135 (20.0)                  | 0.52 (0.39, 0.69)                        |
| <b>HR status</b>                                                   |                               |                                         |                                          |
| HR+/HER2- [2]                                                      | 168 / 157                     | 19 (11.3) / 25 (15.9)                   | 0.70 (0.38, 1.27)                        |
| TNBC [3]                                                           | 751 / 758                     | 87 (11.6) / 153 (20.2)                  | 0.56 (0.43, 0.73)                        |
| <b>BRCA variant type [4]</b>                                       |                               |                                         |                                          |
| BRCA1                                                              | 558 / 558                     | 70 (12.5) / 126 (22.6)                  | 0.52 (0.39, 0.70)                        |
| BRCA2                                                              | 230 / 209                     | 22 (9.6) / 38 (18.2)                    | 0.52 (0.30, 0.86)                        |
| BRCA1/2                                                            | 1 / 3                         | 0 (0.0) / 0 (0.0)                       |                                          |
| <b>HR status by prior chemotherapy setting</b>                     |                               |                                         |                                          |
| HR+/HER2- with neoadjuvant chemotherapy [2]                        | 104 / 92                      | 13 (12.5) / 20 (21.7)                   | 0.52 (0.25, 1.04)                        |
| HR+/HER2- with adjuvant chemotherapy [2]                           | 64 / 65                       | 6 (9.4) / 5 (7.7)                       | 1.36 (0.41, 4.71)                        |
| TNBC with neoadjuvant chemotherapy [3]                             | 354 / 368                     | 57 (16.1) / 97 (26.4)                   | 0.57 (0.41, 0.79)                        |
| TNBC with adjuvant chemotherapy [3]                                | 397 / 390                     | 30 (7.6) / 56 (14.4)                    | 0.54 (0.34, 0.83)                        |
| <b>BRCA status by prior platinum therapy setting</b>               |                               |                                         |                                          |
| BRCA1 with prior platinum therapy for current breast cancer        | 174 / 179                     | 27 (15.5) / 35 (19.6)                   | 0.78 (0.47, 1.28)                        |
| BRCA1 with no prior platinum therapy for current breast cancer     | 384 / 379                     | 43 (11.2) / 91 (24.0)                   | 0.43 (0.30, 0.62)                        |
| BRCA2 with prior platinum therapy for current breast cancer        | 53 / 40                       | 4 (7.5) / 8 (20.0)                      |                                          |
| BRCA2 with no prior platinum therapy for current breast cancer     | 177 / 169                     | 18 (10.2) / 30 (17.8)                   | 0.55 (0.30, 0.98)                        |
| BRCA1/2 both with prior platinum therapy for current breast cancer | 0 / 1                         | 0 / 0 (0.0)                             |                                          |

|                                                                                       |           |                         |                   |
|---------------------------------------------------------------------------------------|-----------|-------------------------|-------------------|
| BRCA1/2 both with no prior platinum therapy for current breast cancer                 | 1 / 2     | 0 (0.0) / 0 (0.0)       |                   |
| <b>Prior platinum by Chemo</b>                                                        |           |                         |                   |
| Prior platinum / ACT                                                                  | 78 / 70   | 8 (10.3) / 4 (5.7)      |                   |
| Prior platinum / NACT                                                                 | 169 / 169 | 26 (15.4) / 39 (23.1)   | 0.66 (0.40, 1.07) |
| No prior platinum / ACT                                                               | 383 / 385 | 28 (7.3) / 57 (14.8)    | 0.51 (0.32, 0.79) |
| No prior platinum / NACT                                                              | 291 / 291 | 44 (15.1) / 78 (26.8)   | 0.51 (0.35, 0.73) |
| <b>Prior platinum by HR status</b>                                                    |           |                         |                   |
| Prior platinum / TNBC                                                                 | 218 / 216 | 28 (12.8) / 40 (18.5)   | 0.70 (0.43, 1.13) |
| Prior platinum / HR+/HER2-                                                            | 28 / 23   | 6 (21.4) / 3 (13.0)     |                   |
| No prior platinum / TNBC                                                              | 533 / 542 | 59 (11.1) / 113 (20.8)  | 0.51 (0.37, 0.70) |
| No prior platinum / HR+/HER2-                                                         | 140 / 134 | 13 (9.3) / 22 (16.4)    | 0.55 (0.27, 1.08) |
| <b>Type of prior Neoadjuvant/Adjuvant chemotherapy</b>                                |           |                         |                   |
| Anthracycline regimen (without taxane)                                                | 7 / 13    | 0 (0.0) / 2 (15.4)      |                   |
| Taxane regimen (without Anthracycline)                                                | 43 / 52   | 5 (11.6) / 8 (15.4)     | 0.64 (0.19, 1.93) |
| Anthracycline and taxane regimen                                                      | 871 / 849 | 101 (11.6) / 168 (19.8) | 0.58 (0.45, 0.74) |
| <b>Type of breast surgery prior to randomisation</b>                                  |           |                         |                   |
| Breast conservation [5]                                                               | 223 / 240 | 20 (9.0) / 46 (19.2)    | 0.46 (0.27, 0.76) |
| Mastectomy [6]                                                                        | 698 / 673 | 86 (12.3) / 131 (19.5)  | 0.51 (0.33, 0.77) |
| <b>Presence of at risk ovarian tissue prior to first dose of treatment</b>            |           |                         |                   |
| No bilateral oophorectomy                                                             | 732 / 739 | 92 (12.6) / 140 (18.9)  | 0.65 (0.50, 0.84) |
| Bilateral oophorectomy                                                                | 189 / 176 | 14 (7.4) / 38 (21.6)    | 0.34 (0.18, 0.62) |
| <b>Pathology axillary node (pN) status at surgery in the TNBC adjuvant cohort [7]</b> |           |                         |                   |
| Node negative                                                                         | 203 / 192 | 13 (6.4) / 22 (11.5)    | 0.61 (0.30, 1.19) |
| Node positive                                                                         | 174 / 177 | 15 (8.6) / 31 (17.5)    | 0.48 (0.25, 0.87) |
| <b>CPS+EG score (for the post neoadjuvant group only)[8]</b>                          |           |                         |                   |
| CPS+EG score of 2, 3 or 4                                                             | 398 / 387 | 55 (13.8) / 96 (24.8)   | 0.51 (0.37, 0.71) |
| CPS+EG score of 5 or 6                                                                | 22 / 15   | 11 (50.0) / 10 (66.7)   | 0.44 (0.19, 1.06) |
| <b>Age at randomisation</b>                                                           |           |                         |                   |
| Age < 50 years                                                                        | 699 / 673 | 79 (11.3) / 133 (19.8)  | 0.56 (0.42, 0.73) |
| Age 50 - 64 years                                                                     | 193 / 210 | 22 (11.4) / 41 (19.5)   | 0.58 (0.34, 0.96) |
| Age ≥65 years                                                                         | 29 / 32   | 5 (17.2) / 4 (12.5)     |                   |
| <b>Race</b>                                                                           |           |                         |                   |
| White                                                                                 | 626 / 599 | 75 (12.0) / 124 (20.7)  | 0.55 (0.41, 0.74) |
| Black/African-American                                                                | 19 / 29   | 4 (21.1) / 5 (17.2)     |                   |

|                                    |           |                         |                   |
|------------------------------------|-----------|-------------------------|-------------------|
| Asian                              | 259 / 272 | 25 (9.7) / 46 (16.9)    | 0.59 (0.36, 0.95) |
| Other                              | 17 / 15   | 2 (11.8) / 3 (20.0)     |                   |
| <b>Ethnicity</b>                   |           |                         |                   |
| Hispanic or Latino                 | 34 / 24   | 7 (20.6) / 7 (29.2)     | 0.65 (0.22, 1.89) |
| Not Hispanic or Latino             | 805 / 812 | 88 (10.9) / 153 (18.8)  | 0.58 (0.44, 0.75) |
| Not known, not recorded or refused | 82 / 79   | 11 (13.4) / 18 (22.8)   | 0.51 (0.24, 1.07) |
| <b>Jewish descent</b>              |           |                         |                   |
| Yes, of Ashkenazi descent          | 41 / 36   | 6 (14.6) / 9 (25.0)     | 0.49 (0.16, 1.35) |
| No, not of Ashkenazi descent [9]   | 880 / 876 | 100 (11.4) / 169 (19.3) | 0.58 (0.45, 0.74) |
| <b>Primary Study Database</b>      |           |                         |                   |
| Breast International Group (BIG)   | 810 / 806 | 95 (11.7) / 160 (19.9)  | 0.58 (0.45, 0.75) |
| NRG Oncology (US)                  | 111 / 109 | 11 (9.9) / 18 (16.5)    | 0.57 (0.26, 1.18) |
| <b>Geographic region</b>           |           |                         |                   |
| North America                      | 122 / 132 | 11 (9.0) / 23 (17.4)    | 0.48 (0.23, 0.97) |
| South America                      | 16 / 12   | 3 (18.8) / 5 (41.7)     |                   |
| Europe                             | 481 / 452 | 62 (12.9) / 95 (21.0)   | 0.59 (0.43, 0.81) |
| Asia Pacific and South Africa      | 302 / 319 | 30 (9.9) / 55 (17.2)    | 0.59 (0.37, 0.91) |

Hazard ratios are provided only if at least 5 IDFS events have occurred in each of the two treatment groups.

Even without correcting for multiple comparisons none of the tests for heterogeneity reached statistical significance

[1] The Cox model included factors for treatment group, subgroup factor and the treatment-by-subgroup interaction. All patients with non-missing subgroup data were included in the model. A hazard ratio <1 favors olaparib 300 mg bd. The CI was calculated using a profile likelihood approach. These analyses are not inferential. Statistics are provided only if at least 5 IDFS events have occurred in each of the two treatment groups.

[2] HR+ is defined as ER positive and/or PgR positive.

[3] Two patients are excluded from the summary of the TNBC subset because they do not have locally confirmed negative HER2 status.

[4] According to central Myriad testing.

[5] Breast conservation defined as partial mastectomy / breast quadrantectomy / breast segmentectomy / breast lumpectomy and breast re-excision of margins.

[6] Mastectomy defined as modified radical mastectomy, radical mastectomy (Halsted) or simple mastectomy, or bilateral mastectomy.

[7] TNBC, adjuvant patients only, with sentinel node sampling or axillary node dissection.

[8] Pre-specified subgroup analysis. Includes patients that received neoadjuvant chemotherapy, whether they had hormone receptor positive or triple negative disease.

---

[9] Not Ashkenazi Jewish can mean that the patient self identifies as either Jewish but not Ashkenazi Jewish, not Jewish or descent recorded as unknown.

**TABLE S11: EXPOSURE TO STUDY TREATMENT (SAFETY ANALYSIS SET)**

|                                           | <b>Olaparib 300 mg bd<br/>(N=911)</b> | <b>Placebo<br/>(N=904)</b> |
|-------------------------------------------|---------------------------------------|----------------------------|
| Total intended exposure (days) [1]        |                                       |                            |
| Mean                                      | 306.5                                 | 322.4                      |
| SD                                        | 114.80                                | 97.54                      |
| Median                                    | 364.0                                 | 364.0                      |
| Min                                       | 1                                     | 2                          |
| Max                                       | 492                                   | 414                        |
| Actual treatment exposure (days) [2]      |                                       |                            |
| Mean                                      | 294.4                                 | 315.1                      |
| SD                                        | 113.90                                | 97.59                      |
| Median                                    | 350.0                                 | 358.0                      |
| Min                                       | 1                                     | 2                          |
| Max                                       | 420                                   | 404                        |
| Number of days on 300 mg treatment bd [3] |                                       |                            |
| Mean                                      | 245.2                                 | 306.3                      |
| SD                                        | 141.68                                | 107.51                     |
| Median                                    | 338.0                                 | 358.0                      |
| Min                                       | 1                                     | 2                          |
| Max                                       | 420                                   | 404                        |

Patients with partial treatment end dates are excluded.

[1] Total intended exposure in days = (last dose date - first dose date + 1); does not take account of dose interruptions.

[2] Actual treatment exposure = intended exposure - total duration of dose interruptions, where intended exposure will be calculated as above.

[3] Number of days on 300mg olaparib/placebo bd (actual exposure for the assigned starting dose).



**TABLE S12: DOSE INTENSITY (SAFETY ANALYSIS SET)**

|                                             | <b>Olaparib 300 mg bd<br/>(N=911)</b> | <b>Placebo<br/>(N=904)</b> |
|---------------------------------------------|---------------------------------------|----------------------------|
| <b>Relative dose intensity (RDI) [1,2]</b>  |                                       |                            |
| No. patients                                | 910                                   | 903                        |
| Mean                                        | 91.9                                  | 96.7                       |
| SD                                          | 12.57                                 | 8.12                       |
| Median                                      | 99.6                                  | 100.0                      |
| Min                                         | 10                                    | 38                         |
| Q1                                          | 87                                    | 97                         |
| Q3                                          | 100                                   | 100                        |
| Max                                         | 103                                   | 100                        |
| <b>Percentage intended dose (PID) [1,3]</b> |                                       |                            |
| No. patients                                | 910                                   | 903                        |
| Mean                                        | 81.1                                  | 92.0                       |
| SD                                          | 27.51                                 | 17.87                      |
| Median                                      | 94.8                                  | 98.9                       |
| Min                                         | 0                                     | 1                          |
| Q1                                          | 75                                    | 94                         |
| Q3                                          | 100                                   | 100                        |
| Max                                         | 100                                   | 100                        |

Patients with partial treatment end dates are excluded.

[1] Treatment up to one year or until the date of invasive disease (whichever is earliest).

[2] Relative dose intensity (RDI) is the percentage of the actual total dose delivered relative to the intended total dose through to treatment discontinuation.

[3] Percentage intended dose (PID) is the percentage of the actual total dose delivered relative to the intended total dose through to invasive disease.

Due to the eCRF design, the actual cumulative dose does not capture all missed or forgotten doses within an individual day. This will be recorded as if the patient took a full daily dose, which could lead to an overestimation of RDI and PID.

---

**TABLE S13 OF CUMULATIVE EXPOSURE OVER TIME IN MONTHS (SAFETY ANALYSIS SET)**

---

| <b>Cumulative exposure over time<br/>(months) [1]</b> | <b>Olaparib 300 mg bd<br/>(N=911)</b> | <b>Placebo<br/>(N=904)</b> |
|-------------------------------------------------------|---------------------------------------|----------------------------|
|                                                       | <i>no. of patients (%)</i>            |                            |
| > 0 months                                            | 910 (99.9)                            | 903 (99.9)                 |
| ≥ 1 month                                             | 848 (93.1)                            | 872 (96.5)                 |
| ≥ 2 months                                            | 824 (90.5)                            | 847 (93.7)                 |
| ≥ 3 months                                            | 801 (87.9)                            | 836 (92.5)                 |
| ≥ 4 months                                            | 782 (85.8)                            | 821 (90.8)                 |
| ≥ 5 months                                            | 769 (84.4)                            | 805 (89.0)                 |
| ≥ 6 months                                            | 757 (83.1)                            | 794 (87.8)                 |
| ≥ 7 months                                            | 752 (82.5)                            | 782 (86.5)                 |
| ≥ 8 months                                            | 739 (81.1)                            | 771 (85.3)                 |
| ≥ 9 months                                            | 719 (78.9)                            | 758 (83.8)                 |
| ≥ 10 months                                           | 706 (77.5)                            | 753 (83.3)                 |
| ≥ 11 months                                           | 685 (75.2)                            | 733 (81.1)                 |

---

Patients with partial treatment end dates are excluded.

[1] Rows are cumulative and subjects are included if they have taken treatment up to and including that day.

**TABLE S14A: BLOOD TRANSFUSIONS (SAFETY ANALYSIS SET)**

|                                              | Olaparib 300 mg bd<br>(N=911) |  | Placebo<br>(N=904) |
|----------------------------------------------|-------------------------------|--|--------------------|
|                                              | <i>no. of patients (%)</i>    |  |                    |
| Patients with at least one blood transfusion | 53 (5.8)                      |  | 8 (0.9)            |
| With ≥ grade 3 anemia on treatment           | 42 (4.6)                      |  | 2 (0.2)            |
| With < grade 3 anemia on treatment           | 9 (1.0)                       |  | 2 (0.2)            |
| No anemia reported on treatment              | 2 (0.2)                       |  | 4 (0.4)            |
| Number of patients with only 1 transfusion   | 37 (4.1)                      |  | 6 (0.7)            |
| Number of patients with 2 transfusions       | 13 (1.4)                      |  | 2 (0.2)            |
| Number of patients with 3 transfusions       | 2 (0.2)                       |  | 0 (0.0)            |
| Number of patients with 5 transfusions       | 1 (0.1)                       |  | 0 (0.0)            |

Includes blood transfusions up to and including 30 days following the date of last dose date.

**TABLE S14B: BLOOD TRANSFUSIONS OVER TIME (SAFETY ANALYSIS SET)**

|                                                                   | Olaparib 300 mg bd<br>(N=911) |                                  | Placebo<br>(N=904)         |                                  |
|-------------------------------------------------------------------|-------------------------------|----------------------------------|----------------------------|----------------------------------|
|                                                                   | <i>no. of patients (%)</i>    | <i>Total no. of transfusions</i> | <i>no. of patients (%)</i> | <i>Total no. of transfusions</i> |
| <b>Treatment month during which blood transfusion is given[1]</b> |                               |                                  |                            |                                  |
| Up to month 1                                                     | 2 (0.2)                       | 2                                | 0 (0.0)                    | 0                                |
| >=1 - 2 months                                                    | 2 (0.2)                       | 2                                | 1 (0.1)                    | 2                                |
| >=2 - 3 months                                                    | 21 (2.3)                      | 22                               | 0 (0.0)                    | 0                                |
| >=3 - 4 months                                                    | 8 (0.9)                       | 10                               | 1 (0.1)                    | 1                                |
| >=4 - 5 months                                                    | 5 (0.5)                       | 5                                | 1 (0.1)                    | 1                                |
| >=5 - 6 months                                                    | 7 (0.8)                       | 8                                | 1 (0.1)                    | 1                                |
| >=6 - 7 months                                                    | 4 (0.4)                       | 4                                | 0 (0.0)                    | 0                                |
| >=7 - 8 months                                                    | 8 (0.9)                       | 8                                | 0 (0.0)                    | 0                                |
| >=8 - 9 months                                                    | 3 (0.3)                       | 3                                | 0 (0.0)                    | 0                                |
| >=9 - 10 months                                                   | 2 (0.2)                       | 2                                | 1 (0.1)                    | 1                                |
| >=10 - 11 months                                                  | 3 (0.3)                       | 3                                | 1 (0.1)                    | 1                                |
| >=11 months                                                       | 5 (0.5)                       | 5                                | 2 (0.2)                    | 3                                |

Includes blood transfusions up to and including 30 days following the date of last dose date.

[1] Patients with multiple transfusions within the same monthly period are counted once for that period.

**TABLE S15: TREATMENT DOSE REDUCTIONS (SAFETY ANALYSIS SET)[1]**

|                                          | <b>Olaparib 300 mg bd<br/>(N=911)</b> | <b>Placebo<br/>(N=904)</b> |
|------------------------------------------|---------------------------------------|----------------------------|
| Patients with no dose reduction (%)      | 683 (75.0)                            | 857 (94.8)                 |
| Patients with a dose reduction (%)       | 228 (25.0)                            | 47 (5.2)                   |
| Total number of dose reductions          | 287                                   | 54                         |
| Number of patients with a dose reduction |                                       |                            |
| 1 dose reduction (%)                     | 170 (18.7)                            | 40 (4.4)                   |
| 2 dose reductions (%)                    | 57 (6.3)                              | 7 (0.8)                    |
| 3 or more dose reductions (%)            | 1 (0.1)                               | 0 (0.0)                    |
| Reason for reduction [2]                 |                                       |                            |
| Adverse event (%)                        | 222 (24.4)                            | 35 (3.9)                   |
| Dosing error (%)                         | 6 (0.7)                               | 10 (1.1)                   |
| Administrative reasons (%)               | 2 (0.2)                               | 1 (0.1)                    |
| Other (%)                                | 0 (0.0)                               | 1 (0.1)                    |

[1] Dose reductions are based on investigator initiated decisions, reductions due to ‘Subject non-compliance’ are omitted.

[2] Reasons for dose reductions are not mutually exclusive for patients with multiple reductions although are counted only once per category.

**TABLE S16: MOST COMMON AES LEADING TO PERMANENT DISCONTINUATION OF TREATMENT (SAFETY ANALYSIS SET)**

| <b>Preferred Term</b>                       | <b>Olaparib 300 mg bd<br/>(N=911)</b><br><i>no. of patients (%)</i> | <b>Placebo<br/>(N=904)</b> |
|---------------------------------------------|---------------------------------------------------------------------|----------------------------|
| Any AE leading to permanent discontinuation | 90 (9.9)                                                            | 38 (4.2)                   |
| Nausea                                      | 18 (2.0)                                                            | 3 (0.3)                    |
| Anaemia                                     | 16 (1.8)                                                            | 0 (0.0)                    |
| Fatigue                                     | 12 (1.3)                                                            | 4 (0.4)                    |
| Neutrophil count decreased                  | 9 (1.0)                                                             | 1 (0.1)                    |
| Headache                                    | 7 (0.8)                                                             | 2 (0.2)                    |
| Vomiting                                    | 7 (0.8)                                                             | 0 (0.0)                    |
| White blood cell count decreased            | 6 (0.7)                                                             | 1 (0.1)                    |
| Dizziness                                   | 2 (0.2)                                                             | 3 (0.3)                    |
| Decreased appetite                          | 2 (0.2)                                                             | 2 (0.2)                    |
| Diarrhoea                                   | 3 (0.3)                                                             | 1 (0.1)                    |
| Breast cancer                               | 1 (0.1)                                                             | 2 (0.2)                    |
| Drug hypersensitivity                       | 3 (0.3)                                                             | 0 (0.0)                    |
| Pruritus                                    | 3 (0.3)                                                             | 0 (0.0)                    |
| Abdominal pain upper                        | 1 (0.1)                                                             | 1 (0.1)                    |
| Arthralgia                                  | 1 (0.1)                                                             | 1 (0.1)                    |

Table shows the number and percentage of patients with that adverse event

Includes AEs with an onset from date of first dose up to 30 days following date of last dose.

**TABLE S17: ANY CONCURRENT HORMONE THERAPY FOR PRIMARY BREAST CANCER IN THE HR+/HER2- SUBGROUP**

|                                                      | <b>Olaparib 300 mg bd<br/>(N=921)</b> | <b>Placebo<br/>(N=915)</b> | <b>Overall<br/>(N=1836)</b> |
|------------------------------------------------------|---------------------------------------|----------------------------|-----------------------------|
|                                                      | <i>no. of patients (%)</i>            |                            |                             |
| <b>All HR+/HER2- patients [1]</b>                    | <b>168 (100.0)</b>                    | <b>157 (100.0)</b>         | <b>325 (100.0)</b>          |
| <b>Any concurrent hormone therapy [2]</b>            | <b>146 (86.9)</b>                     | <b>142 (90.4)</b>          | <b>288 (88.6)</b>           |
| Endocrine therapy                                    | 146 (86.9)                            | 142 (90.4)                 | 288 (88.6)                  |
| Anti-estrogens                                       | 72 (42.9)                             | 61 (38.9)                  | 133 (40.9)                  |
| Tamoxifen                                            | 72 (42.9)                             | 59 (37.6)                  | 131 (40.3)                  |
| Toremifene                                           | 0 (0.0)                               | 2 (1.3)                    | 2 (0.6)                     |
| Aromatase inhibitors                                 | 83 (49.4)                             | 85 (54.1)                  | 168 (51.7)                  |
| Anastrozole                                          | 25 (14.9)                             | 30 (19.1)                  | 55 (16.9)                   |
| Exemestane                                           | 23 (13.7)                             | 23 (14.6)                  | 46 (14.2)                   |
| Letrozole                                            | 41 (24.4)                             | 37 (23.6)                  | 78 (24.0)                   |
| Pituitary and hypothalamic hormones<br>and analogues | 39 (23.2)                             | 33 (21.0)                  | 72 (23.7)                   |

Each treatment will be counted a maximum of once per patient. Percentages presented are based on those patients that have hormone receptor positive breast cancer.

Of the 325 patients with hormone-receptor positive disease, 147 had oophorectomy either before (n=74) or following (n=73) randomization. These numbers for olaparib are: 42, and 33; and for placebo are: 32 and 40.

[1] HR+ is defined as ER positive and/or PgR positive based on a cut-off for positivity of  $\geq 1\%$  of cells stained positive.

[2] NB. The protocol defines hormone-receptor positivity as  $\geq 1\%$  of cells stained positive but use of adjuvant endocrine therapy was determined by institutional and/ or national guidelines, which may not recommend endocrine therapy for patients with tumors with 1-9% staining of cells for estrogen receptor explaining the lack of endocrine therapy use in 11.4% of patients balanced between treatment arms.

## TABLE S18: IMPORTANT PROTOCOL DEVIATIONS

Important protocol deviations (IPD)s are a concise list of pre-defined protocol deviations which have a very high likelihood of influencing the primary efficacy and/or the secondary safety results. IPD's are also distinct from simple protocol deviations.

|                                                                                                                                        | Olaparib 300 mg bd<br>(N=921) | Placebo<br>(N=915) | Overall<br>(N=1836) |
|----------------------------------------------------------------------------------------------------------------------------------------|-------------------------------|--------------------|---------------------|
|                                                                                                                                        | <i>no. of patients (%)</i>    |                    |                     |
| <b>Number of patients with at least one important protocol deviation triggering a sensitivity analysis [1]</b>                         | 16 (1.7)                      | 14 (1.5)           | 30 (1.6)            |
| No histologically confirmed non-metastatic primary invasive adenocarcinoma of the breast [2]                                           | 3 (0.3)                       | 0 (0.0)            | 3 (0.2)             |
| No documented germline pathogenic /likely pathogenic variant in <i>BRCA1</i> or <i>BRCA2</i> [2]                                       | 3 (0.3)                       | 3 (0.3)            | 6 (0.3)             |
| Randomized but did not receive any study treatment [2]                                                                                 | 10 (1.1)                      | 11 (1.2)           | 21 (1.1)            |
| <b>Number of patients with at least one important protocol deviation excl. important GCP violations [3]</b>                            | 130 (14.1)                    | 122 (13.3)         | 252 (13.7)          |
| No histologically confirmed non-metastatic primary invasive adenocarcinoma of the breast [2]                                           | 3 (0.3)                       | 0 (0.0)            | 3 (0.2)             |
| No documented germline pathogenic /likely pathogenic variant in <i>BRCA1</i> or <i>BRCA2</i> [2]                                       | 3 (0.3)                       | 3 (0.3)            | 6 (0.3)             |
| Randomized but did not receive any study treatment [2]                                                                                 | 10 (1.1)                      | 11 (1.2)           | 21 (1.1)            |
| Not fulfilling criteria for high risk disease                                                                                          | 25 (2.7)                      | 12 (1.3)           | 37 (2.0)            |
| Inadequate breast surgery and/or radiotherapy                                                                                          | 7 (0.8)                       | 8 (0.9)            | 15 (0.8)            |
| Inadequate axilla surgery                                                                                                              | 5 (0.5)                       | 1 (0.1)            | 6 (0.3)             |
| Completed less than 6 cycles of neoadjuvant or adjuvant chemotherapy containing anthracyclines, taxanes or the combination of both     | 7 (0.8)                       | 15 (1.6)           | 22 (1.2)            |
| Peri-operative chemotherapy (patients who had both neoadjuvant and adjuvant therapy; 'unquantifiable risk of disease relapse')         | 4 (0.4)                       | 6 (0.7)            | 10 (0.5)            |
| Evidence of metastatic disease (to include only those patients who had suspicion or confirmation of recurrence prior to randomisation) | 2 (0.2)                       | 4 (0.4)            | 6 (0.3)             |
| No staging or insufficient staging                                                                                                     | 67 (7.3)                      | 66 (7.2)           | 133 (7.2)           |
| Prior PARP inhibitor use                                                                                                               | 0 (0.0)                       | 0 (0.0)            | 0 (0.0)             |
| Prior cancer < 5 years ago including MDS/t-AML                                                                                         | 0 (0.0)                       | 2 (0.2)            | 2 (0.1)             |

---

|                                                                                                                   |          |          |          |
|-------------------------------------------------------------------------------------------------------------------|----------|----------|----------|
| Received no study treatment whatsoever for a period of more than 7 days due to errors in dispensing of medication | 5 (0.5)  | 4 (0.4)  | 9 (0.5)  |
| Received an alternative study treatment to that which they were randomized                                        | 0 (0.0)  | 0 (0.0)  | 0 (0.0)  |
| Received prohibited concomitant medication                                                                        | 10 (1.1) | 12 (1.3) | 22 (1.2) |
| Received additional anti-cancer therapy prior to IDFS event [4]                                                   | 0 (0.0)  | 0 (0.0)  | 0 (0.0)  |
| Received other investigational agent prior to IDFS event                                                          | 0 (0.0)  | 0 (0.0)  | 0 (0.0)  |
| Lack of confirmatory exams for events that count towards the analysis end points, efficacy and safety             | 0 (0.0)  | 1 (0.1)  | 1 (0.1)  |

---

[1] Statistical Analysis Plan specified that a sensitivity analysis for primary efficacy be conducted if >10% of the full analysis set did not have the intended disease or indication or did not receive any study medication. This is shown in Table S9.

[2] An important protocol deviation (IPD) that triggers a sensitivity analysis

[3] The same patient may have had more than one important protocol deviation. Important protocol deviations are those that could have a strong influence on the interpretation of the efficacy or safety results.

[4] Other than hormone therapy or adjuvant bisphosphonates permitted in the protocol.



**TABLE S19: SUMMARY OF ADVERSE EVENTS IN THE SAFETY ANALYSIS SET [1]**

| <b>Adverse Event — no. of patients (%)</b>                          | <b>Olaparib (N=911)</b> | <b>Placebo (N=904)</b> |
|---------------------------------------------------------------------|-------------------------|------------------------|
| Any adverse event                                                   | 835 (91.7)              | 753 (83.3)             |
| Serious adverse event                                               | 79 (8.7)                | 76 (8.4)               |
| Adverse event of special interest [2]                               | 30 (3.3)                | 46 (5.1)               |
| MDS/AML                                                             | 2 (0.2)                 | 3 (0.3)                |
| Pneumonitis [3]                                                     | 9 (1.0)                 | 11 (1.2)               |
| New primary cancer [4]                                              | 19 (2.1)                | 32 (3.5)               |
| New primary invasive breast cancer                                  | 7                       | 8                      |
| New primary ductal carcinoma in situ                                | 3                       | 4                      |
| New primary ovarian malignancy [5]                                  | 1                       | 4                      |
| New primary fallopian tube cancer                                   | 1                       | 4                      |
| New primary lung cancer                                             | 1                       | 2                      |
| Malignant melanoma                                                  | 1                       | 3                      |
| Non-melanoma skin cancer                                            | 3                       | 2                      |
| Other [6]                                                           | 3                       | 6                      |
| Grade $\geq$ 3 adverse event                                        | 221 (24.3)              | 102 (11.3)             |
| Grade 4 adverse event [7]                                           | 17 (1.9)                | 4 (0.4)                |
| Decreased neutrophil count                                          | 5                       | 0                      |
| Anemia                                                              | 4                       | 0                      |
| Decreased lymphocyte count                                          | 3                       | 0                      |
| Depression                                                          | 0                       | 2                      |
| Other [8]                                                           | 6                       | 2                      |
| Adverse event leading to permanent discontinuation of treatment [9] | 90 (9.9)                | 38 (4.2)               |
| Adverse event leading to death [10]                                 | 1 (0.1)                 | 2 (0.2)                |

---

[1] Included are adverse events with an onset date on or after the date of the first dose and up to and including 30 days after the date of the last dose of olaparib or placebo. The safety analysis set excludes patients who did not receive any olaparib or placebo. AML denotes acute myeloid leukemia, and MDS myelodysplastic syndrome.

[2] Included are adverse events of special interest with an onset at any date after the first dose of olaparib or placebo. One patient in the olaparib group had both pneumonitis and a nonmelanoma skin cancer and is counted in both the pneumonitis and new primary cancer categories.

[3] In the olaparib group, seven patients had pneumonitis, and two patients had radiation pneumonitis. In the placebo group, eight patients had pneumonitis, and three patients had radiation pneumonitis.

[4] In the olaparib group, nineteen patients had twenty new primary cancers: one patient had both new primary breast cancer and new primary lung cancer and is counted in both categories. In the placebo group, thirty-two patients had thirty-three new primary cancers: one patient had new primary breast cancer and new serous tubular intraepithelial carcinoma, and is counted in both new primary invasive breast cancer and the 'other' categories.

[5] In the olaparib group, one patient had new primary ovarian cancer (a possible recurrence of ovarian cancer > 5 years before randomization).

[6] In the olaparib group, one patient each in the 'other' category had colorectal cancer, endometrial adenocarcinoma, and meningioma. In the placebo group, one patient each in the 'other' category had cervical carcinoma, endometrial adenocarcinoma, pancreatic carcinoma, rectal carcinoma, transitional-cell carcinoma, and new serous tubular intraepithelial carcinoma (in a patient who also had new primary invasive breast cancer).

[7] A total of 18 grade 4 adverse events were reported in 17 patients who received olaparib; one patient had both grade 4 anemia and decreased neutrophil count and is counted in both of anemia and decreased neutrophil count categories.

[8] In the olaparib group, one patient each in the 'other' category had AML, bipolar disorder, fatigue, febrile neutropenia, abnormal hepatic function, and a suicide attempt. In the placebo group, one patient each in the 'other' category had increased aspartate aminotransferase level and acute cholecystitis.

[9] The most common adverse events, occurring in at least 1% of the patients, that led to discontinuation of olaparib were nausea (2.0%), anemia (1.8%), fatigue (1.3%), and decreased neutrophil count (1.0%); there were no adverse events that occurred in at least 1% of patients that led to discontinuation of placebo.

[10] In the olaparib group, cardiac arrest led to death in one patient. In the placebo group, AML and ovarian cancer led to death in one patient each.

---

---

## 6. REFERENCE

1. Mittendorf EA, Jeruss JS, Tucker SL, et al. Validation of a novel staging system for disease-specific survival in patients with breast cancer treated with neoadjuvant chemotherapy. *J Clin Oncol* 2011;29:1956–62.
